# Supplementary material
Source: PubMed Central journal article supplement (PMC449705)
Supplement: 1471-2164-5-37-S1.pdf [file 1471-2164-5-37-S1.pdf]

**SUPPLEMENTARY TABLES**  
**Predicting N-terminal Myristoylation Sites in Plant Proteins**

Sheila Podell and Michael Gribskov

San Diego Supercomputer Center and Department of Biology, University of California San Diego, 9500 Gilman Drive,  
La Jolla, CA 92093-0537

## Contents

| Title                                                                                                                                      | Page |
|--------------------------------------------------------------------------------------------------------------------------------------------|------|
| Supplementary Table 1. Plant proteins used in myristoylation classified positive set.                                                      | 1    |
| Supplementary Table 2. Plant proteins used in myristoylation classified negative set                                                       | 6    |
| Supplementary Table 3. Plant proteins used to supplement myristoylation positive training set, to build a second generation of HMM models. | 19   |
| Supplementary Table 4. <i>Arabidopsis thaliana</i> proteins predicted to contain N-terminal myristoylation sites.                          | 38   |
| Supplementary Table 5. Non- <i>Arabidopsis</i> plant proteins predicted to contain N-terminal myristoylation sites.                        | 56   |
| Supplementary Table 6. Predicted internal myristoylation sites in <i>Arabidopsis thaliana</i> .                                            | 69   |

**Supplementary Table 1.** Plant proteins used in myristoylation classified positive set.

| Sequence (Classified Positives)    | ID                          | Description | Species              | Basis                         | Reference                                                                    |
|------------------------------------|-----------------------------|-------------|----------------------|-------------------------------|------------------------------------------------------------------------------|
| <b>Kinases - Calcium Dependent</b> |                             |             |                      |                               |                                                                              |
| MGNTCVGPSRNGFLQSVSAAMWRPR          | gi 15237928 ref NP_197815.1 | CPK 01      | Arabidopsis thaliana | homology<br>+ memb<br>localiz | First 7 residues identical to<br>Curcubita pepo cpCPK1.<br>Damman et al 2003 |
| MGNACVGPNISGNGLQTVTAAMWR           | gi 15227920 ref NP_179379.1 | CPK 02      | Arabidopsis thaliana | direct +<br>peptide           | Lu & Hrabak 2002, BGM                                                        |
| MGHRHSSKSSDPPSSSSSSSSGNV           | gi 15234656 ref NP_193925.1 | CPK 03      | Arabidopsis thaliana | peptide                       | BGM, Qi                                                                      |
| MGNSCRGSFKDKLDEGDNNKPEDYS          | gi 15236560 ref NP_194096.1 | CPK 05      | Arabidopsis thaliana | direct                        | Hrabak et al Plant Phys 132:666-<br>680 2003                                 |
| MGNSCRGSFKDKIYEGNHSRPEENS          | gi 30679935 ref NP_565411.2 | CPK 06      | Arabidopsis thaliana | homology                      | First 7 residues identical to<br>CPK5                                        |
| MGNCCGNPSSATNQSKQGKPKNKNN          | gi 18416872 ref NP_568281.1 | CPK 07      | Arabidopsis thaliana | homology<br>+ memb<br>localiz | Damman et al 2003                                                            |
| MGNCCASPGSETGSKKGKPKIKSNP          | gi 30687323 ref NP_850853.1 | CPK 08      | Arabidopsis thaliana | homology<br>+ memb<br>localiz | Damman et al 2003                                                            |
| MGNCFAKNHGLMKPQQNGNTTRSVE          | gi 15230321 ref NP_188555.1 | CPK 09      | Arabidopsis thaliana | homology<br>+ memb<br>localiz | Damman et al 2003                                                            |
| MGNCNACVRPDSKESKPSKPKKPN           | gi 28416563 gb AAO42812.1   | CPK 10      | Arabidopsis thaliana | homology                      | First 7 reisdues almost identical<br>to CPK30 & CPK33                        |
| MGNCCGTAGSLIQDKQKKGFKLPNP          | gi 15227001 ref NP_180459.1 | CPK 14      | Arabidopsis thaliana | homology                      | First 7 residues identical to<br>CPK32                                       |
| MGCFSSKHRNTESDIINGSVQSSIP          | gi 15234441 ref NP_192383.1 | CPK 15      | Arabidopsis thaliana | homology<br>+ memb<br>localiz | First 7 residues identical to CPK<br>21                                      |
| MGLCFSSAAKSSGHNRSSRNPHPHP          | gi 15227525 ref NP_181133.1 | CPK 16      | Arabidopsis thaliana | homology<br>+ memb<br>localiz | Damman et al 2003                                                            |
| MGNCCSHGRDSADNGDALENGASAS          | gi 15239716 ref NP_197437.1 | CPK 17      | Arabidopsis thaliana | homology                      | First 7 residues identical to<br>CPK34. (CPK17)                              |
| MGLCFSSPKATRRGTGSRNPNDSP           | gi 15234174 ref NP_195066.1 | CPK 18      | Arabidopsis thaliana | homology                      | First 7 residues identical to<br>CPK16                                       |

| Sequence (Classified Positives) | ID                                   | Description    | Species                       | Basis                             | Reference                                                                  |
|---------------------------------|--------------------------------------|----------------|-------------------------------|-----------------------------------|----------------------------------------------------------------------------|
| MGNTCVGPNLNPNGFLQSVSAAVWR       | gi 15224978 ref NP_181425.1          | CPK 20         | Arabidopsis thaliana          | homology                          | First 7 residues identical to Curcubita pepo cpCPK1                        |
| MGCFSSKHRKTQNDGGEKSIPINPV       | gi 15234432 ref NP_192380.1          | CPK 21         | Arabidopsis thaliana          | homology                          | Damman et al 2003                                                          |
| MGNCCGSKPLTASDIVSDQKQETIL       | gi 15234430 ref NP_192379.1          | CPK 22         | Arabidopsis thaliana          | homology                          | First 7 residues almost identical to CPK32                                 |
| MGCFSSKHRKTQNDGGGERSIPIIP       | gi 15234435 ref NP_192381.1          | CPK 23         | Arabidopsis thaliana          | homology                          | First 7 residues identical to CPK 21                                       |
| MGSCVSSPLKGSPFGKRPVRRRHSS       | gi 15225092 ref NP_180708.1          | CPK 24         | Arabidopsis thaliana          | homology                          | First 7 residues almost identical to StCPK1                                |
| MGCFSSKELQQSKRTILEKPLVDIT       | gi 15234291 ref NP_195331.1          | CPK 27         | Arabidopsis thaliana          | homology                          | First 6 residues identical to CPK 21                                       |
| MGVCFSAIRVTGASSRRSSQTISK        | gi 34098881 gb AAQ56823.1            | CPK 28         | Arabidopsis thaliana          | homology + memb localiz           | Damman et al 2003                                                          |
| MGNCIACVKFDPDNSKPNQKKKPPR       | gi 30699042 ref NP_177612.2          | CPK 30         | Arabidopsis thaliana          | homology                          | First 7 residues almost identical to CPK33 & CPK10                         |
| MGCYSSKNLQSKRTILEKPFVDIG        | gi 22328350 ref NP_680596.1          | CPK 31         | Arabidopsis thaliana          | homology                          | First 7 residues identical to membrane localized CPK 21,23 (CPK 31)        |
| MGNCLAKKYGLVMKPQQNGERSVEI       | gi 15223629 ref NP_175485.1          | CPK 33         | Arabidopsis thaliana          | homology                          | First 7 almost identical to CPK30 & CPK10                                  |
| MGNCCSHGRDSDDNKEEPREPENGGG      | gi 15238353 ref NP_196107.1          | CPK 34         | Arabidopsis thaliana          | homology                          | First 7 residues identical to CPK17                                        |
| MGGCFSKKEYQADNGYRSAPTAYH        | gi 7434365 pir T14335                | CDPK           | Daucus carota                 | peptide + homology                | Qi. First 7 residues identical to L.esculentum CAC87494.1                  |
| MGGCFSKKYRQEGANGGYRATRRN        | gi 3283996 gb AAC25423.1             | CDPK (NtCDPK1) | Nicotiana tabacum             | peptide + homology + memb localiz | Qi, First 7 residues identical to L.esculentum CAC87494.1. Yoon et al 1999 |
| MGGCFSKKYTQQDANGHRAGRRVNQ       | gi 19171502 emb CAC87494.1           | CDPK (LeCDPK1) | Lycopersicon esculentum       | direct                            | Rutschmann et al. 2002                                                     |
| MGICASKGKPNANNGHHGSGSGGV        | gi 14029712 gb AAK52801.1 AF363784_1 | CDPK           | Lycopersicon esculentum       | homology                          | First 7 residues identical to L. esculentum LeCDPK1                        |
| MGICASKNKATQPEDNGYTPANGVG       | gi 4336426 gb AAD17800.1             | CDPK           | Mesembryanthemum crystallinum | homology                          | First 7 residues identical to L. esculentum LeCDPK1                        |

| Sequence (Classified Positives) | ID                                  | Description                      | Species                    | Basis                         | Reference                                                                                                |
|---------------------------------|-------------------------------------|----------------------------------|----------------------------|-------------------------------|----------------------------------------------------------------------------------------------------------|
| MGNRTSRHKHGEKHRSEAGSHQTHI       | gi 7434369 pir  T10938              | CDPK                             | Ipomoea batatas            | homology<br>+ memb<br>localiz | Ohto et al. 1995                                                                                         |
| MGNSCVGAAGYFQGFTSVIALGGRS       | gi 2315983 gb AAB70706.1            | CDPK                             | Tortula ruralis            | homology                      | First 7 residues almost identical to Curcubita pepo cpCPK1                                               |
| MGNTCVGPSISKNGFFESVSAAMWR       | gi 7434364 pir  T09940              | CDPK                             | Cucurbita pepo             | direct                        | Ellard-Ivey et al                                                                                        |
| MGNTCVGPSISKNGIFQSVSAAMWR       | gi 16215471 emb CAC82999.1          | CDPK<br>(NtCDPK3)                | Nicotiana tabacum          | homology                      | First 7 residues identical to Curcubita pepo cpCPK1                                                      |
| MGNTCVGPSISKNGLFQSVSAAMWR       | gi 16215467 emb CAC82998.1          | CDPK<br>(NtCDPK2)                | Nicotiana tabacum          | homology                      | First 7 residues identical to Curcubita pepo cpCPK1                                                      |
| MGNTCVGPSITMNGFFQSVSTALWK       | gi 7428007 pir  T02784              | CDPK                             | Zea mays                   | homology                      | First 7 residues identical to Curcubita pepo cpCPK1                                                      |
| MGNTCVGPSSAADRHGFFHSVSLAV       | gi 33146743 dbj BAC79646.1          | CDPK                             | Oryza sativa               | homology                      | First 7 residues identical to Curcubita pepo cpCPK1                                                      |
| MGSCSRATSPDSGRGGANGYGYSH        | gi 23616997 dbj BAC20693.1          | CDPK<br>(OSCPK2)                 | Oryza sativa               | direct                        | Martin & Busconi 2000.                                                                                   |
| MGVCLSKSKPAESKSDGHYRSGSD        | gi 10568116 gb AAD28192.2           | CDPK<br>(StCDPK1)                | Solanum tuberosum          | direct                        | Raices et al 2001                                                                                        |
| MGHCYSRNISTVDDDDEIPSATAQL       | gi 15228912 ref NP_188935.1         | CRK6                             | Arabidopsis thaliana       | peptide                       | BGM                                                                                                      |
| Kinases - non CDPK              |                                     |                                  |                            |                               |                                                                                                          |
| MGCVLCKESTGDKRKHNNPDEPPPA       | gi 15241289 ref NP_199899.1         | KINASE -<br>cyclin               | Arabidopsis thaliana       | peptide                       | BGM                                                                                                      |
| MGSKYSKATNSINDASNLSYGIPFE       | gi 8547239 gb AAF76314.1            | KINASE - Fen<br>(Pto)            | Lycopersicon<br>esculentum | peptide                       | Qi .                                                                                                     |
| MGSKYSKATNSINDASNSSYRVPFE       | gi 16326617 gb AAL17825.1           | KINASE - Fen<br>(Pto)            | Solanum nigrum             | peptide +<br>homology         | Qi. First 14 residues identical in Capsicum annuum, Lycopersicon pimpinellifolium, Lycopersicon hirsutum |
| MGSKYSKATNSISDASNSRYGVPFE       | gi 8547235 gb AAF76310.1 AF220603_2 | Kinase -<br>Fen(Pto)<br>LescPth3 | Lycopersicon<br>esculentum | peptide                       | Qi.                                                                                                      |
| Phosphatases                    |                                     |                                  |                            |                               |                                                                                                          |
| MGSGASKNTEEDDDGSNGGGGQLYV       | gi 15222304 ref NP_172191.1         | fructose-2,6-<br>bisphosphatase  | Arabidopsis thaliana       | peptide                       | BGM                                                                                                      |

| Sequence (Classified Positives) | ID                              | Description          | Species                             | Basis              | Reference                                                                                               |
|---------------------------------|---------------------------------|----------------------|-------------------------------------|--------------------|---------------------------------------------------------------------------------------------------------|
| MGLKLSRGPVKEKSPLEFTRVHILT       | gi 30693398 ref NP_198756.2     | PTEN-related protein | Arabidopsis thaliana                | peptide            | BGM                                                                                                     |
| Calcium Binding proteins        |                                 |                      |                                     |                    |                                                                                                         |
| MGCSVSKKKKKNAMRPPGYEDPELL       | gi 3309575 gb AAC26110.1        | SOS3                 | Arabidopsis thaliana                | direct + peptide   | Ishitani etal, BGM                                                                                      |
| MGGSSSKESPRGGGSGRRYERSVSG       | gi 18408863 ref NP_564907.1     | COPINE               | Arabidopsis thaliana                | peptide            | BGM                                                                                                     |
| Transcription Factors           |                                 |                      |                                     |                    |                                                                                                         |
| MGCAQSKIENEEAVTRCKERKQLMK       | gi 25405541 pir D96563          | bZIP                 | Arabidopsis thaliana                | peptide            | BGM                                                                                                     |
| MGCTASKVEQEDTVRRCKERRRHMK       | gi 13124871 gb AAK01315.2       | bZIP                 | Oryza sativa                        | peptide            | BGM                                                                                                     |
| MGCTASKLDSEDAVRRCKERRRLMK       | gi 15217620 ref NP_171713.1     | proline-rich         | Arabidopsis thaliana                | peptide            | BGM                                                                                                     |
| Peroxidases                     |                                 |                      |                                     |                    |                                                                                                         |
| MGGALSTVFGSGEDATAAGTESEPS       | gi 15242525 ref NP_198811.1     | thioredoxin          | Arabidopsis thaliana                | peptide            | BGM                                                                                                     |
| GTP-binding proteins            |                                 |                      |                                     |                    |                                                                                                         |
| MGAFMSRFWFMMFPAKEYKIVVVGL       | gi 15228464 ref NP_186962.1     | ARF                  | Arabidopsis thaliana                | peptide            | BGM                                                                                                     |
| MGARFSRIAKRFLPKSKVRILMVGL       | gi 15226086 ref NP_179133.1     | ARF                  | Arabidopsis thaliana                | peptide            | BGM                                                                                                     |
| MGILFTRMFSSVFGNKEARILVLGL       | gi 30682545 ref NP_850057.1     | ARF                  | Arabidopsis thaliana, Brassica rapa | peptide            | BGM                                                                                                     |
| MGLNFTKLF SRLFAKKEMRILMVGL      | gi 15241463 ref NP_196971.1     | ARF                  | Arabidopsis thaliana                | peptide            | BGM                                                                                                     |
| MGLSFAKLF SRLFAKKEMRILMVGL      | gi 30698721 ref NP_850975.1     | ARF                  | Arabidopsis thaliana                | peptide + homology | BGM, First 25 residues identical in Gossypium hirsutum                                                  |
| MGLSFGKLF SRLFAKKEMRILMVGL      | gi 1703374 sp P51821 ARF_CHLRE  | ARF                  | Arabidopsis thaliana                | peptide + homology | BGM, First 25 residues identical in Capsicum annum                                                      |
| MGLSFTKLF SRLFAKKEMRILMVGL      | gi 11131023 sp O48649 ARF_SALBA | ARF                  | Daucus carota                       | homology           | First 25 residues identical in Vigna unguiculata, Catharanthus roseus, Populus tremuloides, Salix bakko |
| MGLSFTKLLGRLFSKKEMRILMVGL       | gi 29124981 gb AAO63780.1       | ARF                  | Populus tremuloides                 | homology           | First 25 residues identical in Salix bakko                                                              |

| Sequence (Classified Positives) | ID                             | Description                    | Species                 | Basis            | Reference                                                                                                         |
|---------------------------------|--------------------------------|--------------------------------|-------------------------|------------------|-------------------------------------------------------------------------------------------------------------------|
| MGLTFTKLF SRLFAKKEMRILMVGL      | gi 32129330 gb AAP73857.1      | ARF                            | Oryza sativa            | homology         | First 25 residues identical in Hordeum vulgare, Nicotiana tabacum, Triticum aestivum, Zea mays, Solanum tuberosum |
| MGLTISKLF SRLFAKKEMRILMVGL      | gi 1703376 sp P51824 ARF_SOLTU | ARF                            | Solanum tuberosum       | homology         | First 7 residues almost identical to AAP73857.1                                                                   |
| MGQAFRKLFD TFFGNQEMRVV MLGL     | gi 15237901 ref NP_197208.1    | ARF                            | Arabidopsis thaliana    | peptide          | BGM                                                                                                               |
| MGQAFRKLFD AFFGNKEMRVV MLGL     | gi 31433708 gb AAP55187.1      | ARF                            | Oryza sativa            | peptide          | BGM                                                                                                               |
| MGQTRKLFDT FFFGNQEMRVV MLGL     | gi 28827546 gb AAO50617.1      | ARF                            | Arabidopsis thaliana    | peptide          | BGM                                                                                                               |
| MGTTLGKPFAGFFHQEEARIVL FGL      | gi 18378965 ref NP_563652.1    | ARF                            | Arabidopsis thaliana    | peptide          | BGM                                                                                                               |
| MGLLCRSR RHHTEDTDENTQAAEIE      | gi 15225278 ref NP_180198.1    | G protein alpha subunit (GPA1) | Arabidopsis thaliana    | peptide          | BGM                                                                                                               |
| MGCASSLPDRNSG TLSGLS NSENAV     | gi 18410144 ref NP_567008.1    | Rab GTPase (Ara6)              | Arabidopsis thaliana    | direct + peptide | Ueda et al., BGM                                                                                                  |
| Disease Resistance              |                                |                                |                         |                  |                                                                                                                   |
| MGGCFSVSLPCDQVVSQFSQLLCVR       | gi 15221252 ref NP_172686.1    | CC-NBS-LRR                     | Arabidopsis thaliana    | homology         | First 6 residues identical to L. esculentum CAC87494.1                                                            |
| MGGCVSVQVSCDQLLNHLGRFCRK        | gi 15221280 ref NP_172693.1    | CC-NBS-LRR                     | Arabidopsis thaliana    | peptide          | BGM                                                                                                               |
| MGGCVSVSISCDQLTKNVC SCLNRN      | gi 30697771 ref NP_201107.2    | CC-NBS-LRR                     | Arabidopsis thaliana    | peptide          | BGM                                                                                                               |
| MGGCVSVSLSCDREVNQFSQWLCVS       | gi 15221250 ref NP_172685.1    | CC-NBS-LRR - RFL1              | Arabidopsis thaliana    | peptide          | BGM                                                                                                               |
| MGISFSIPFDPCV NKVSQWLD MKGS     | gi 15221520 ref NP_176451.1    | CC-NBS-LRR                     | Arabidopsis thaliana    | peptide          | BGM                                                                                                               |
| MGSVMSLGCSKRKATNQDV DSESRK      | gi 30692151 ref NP_190034.2    | TIR-NBS-LRR                    | Arabidopsis thaliana    | peptide          | BGM                                                                                                               |
| MGSVMSLGCSKRKATSQDV DSESRK      | gi 11357250 pir T47442         | dis_resist                     | Arabidopsis thaliana    | peptide          | BGM                                                                                                               |
| Misc                            |                                |                                |                         |                  |                                                                                                                   |
| MGAAGSKLEKALGDQFPEGERYFGF       | gi 18420557 ref NP_568074.1    | ubiquitin-specific protease    | Arabidopsis thaliana    | peptide          | BGM                                                                                                               |
| MGANHSREDELESDSESESEYGSSES      | gi 7488984 pir T07737          | Dem protein                    | Lycopersicon esculentum | peptide          | Qi                                                                                                                |
| MGASHSHEDLEICSSDEDEYEEYEE       | gi 15234174 ref NP_195066.1    | Dem protein                    | Arabidopsis thaliana    | peptide          | BGM                                                                                                               |
| MGTSQSREDRISES DTESDSY YEE      | gi 15229785 ref NP_190622.1    | Dem protein                    | Arabidopsis thaliana    | peptide          | BGM                                                                                                               |

| <b>Sequence (Classified Positives)</b> | <b>ID</b>                            | <b>Description</b>               | <b>Species</b>       | <b>Basis</b> | <b>Reference</b> |
|----------------------------------------|--------------------------------------|----------------------------------|----------------------|--------------|------------------|
| MGLGASVLTkTLTFAAAFSAFGDPI              | gi 13877587 gb AAK43871.1 AF370494_1 | oxoglutarate-malate translocator | Arabidopsis thaliana | peptide      | BGM              |



**Supplementary Table 2** - Plant proteins used in myristoylation classified negative set

| Sequence (Classified Negatives) | ID                                   | Function                                                    | Species              | Basis for neg                    |
|---------------------------------|--------------------------------------|-------------------------------------------------------------|----------------------|----------------------------------|
| MGFSFSSNRFGYLTVTFLVISCLL        | gi 15238663 ref NP_197287.1          | cation exchanger, putative (CAX8)                           | Arabidopsis thaliana | BGM negative peptide<br>GFSFSSNR |
| MGKKKSDESAATTKVKPSGKDASKD       | gi 18410084 ref NP_567001.1          | ABC transporter family protein                              | Arabidopsis thaliana | BGM negative peptide<br>GKKKSDES |
| MGLLEAFLNWLRSFFKQEMELSLI        | gi 22331720 ref NP_190556.2          | ADP-ribosylation factor, putative                           | Arabidopsis thaliana | BGM negative peptide<br>GLLEAFLN |
| MGLLSNRIDRSSLKPGDHIYSWRTA       | gi 18415178 ref NP_568167.1          | expressed protein                                           | Arabidopsis thaliana | BGM negative peptide<br>GLLSNRID |
| MGRSSSKKKKRRGGSGRRGQLKDHG       | gi 30694992 ref NP_191500.2          | protein kinase like                                         | Arabidopsis thaliana | BGM negative peptide<br>GRSSSKKK |
| MGSDGDKKKKFIVAGSVSGFLVIMV       | gi 22330893 ref NP_187339.2          | pectin methylesterase, putative [Arabidopsis thaliana]      | Arabidopsis thaliana | BGM negative peptide<br>GSDGDKKK |
| MGSEYKHILKSLCLSHGWSYAVFWR       | gi 30699554 ref NP_849917.1          | hypothetical protein [Arabidopsis thaliana]                 | Arabidopsis thaliana | BGM negative peptide<br>GSEYKHIL |
| MGVKSVRFSIWFLFVVTDLVFCRTL       | gi 18412743 ref NP_565236.1          | glycosyltransferase family 47]                              | Arabidopsis thaliana | BGM negative peptide<br>GVKSVRFS |
| MGAFRFHQYQVVGRALPTEKDVQPK       | gi 15226755 ref NP_180995.1          | 60S ribosomal protein L18A (RPL18aB) [Arabidopsis thaliana] | Arabidopsis thaliana | Function annotation              |
| MGAFRFHQYQVVGRGLPTPTDEHPK       | gi 21362867 sp Q943F3 RL1X_ORYSA     | 60S ribosomal protein L18a                                  | Oryza sativa         | Function annotation              |
| MGAGRKLKQLRITQRWADKHYYKSN       | gi 6682246 gb AAF23298.1 AC016661_23 | putative 40S ribosomal protein S23 [Arabidopsis thaliana]   | Arabidopsis thaliana | Function annotation              |
| MGAMHSRGGKGISSALPYKRTPTW        | gi 419802 pir  S30146                | ribosomal protein S13, cytosolic - maize                    | Zea Mays             | Function annotation              |

| Sequence (Classified Negatives) | ID                                   | Function                                                                                                 | Species              | Basis for neg       |
|---------------------------------|--------------------------------------|----------------------------------------------------------------------------------------------------------|----------------------|---------------------|
| MGAPCTWTIGWREFVRRACDAREEG       | gi 5257276 dbj BAA81775.1            | Similar to Mycobacterium tuberculosis cosmid SCY13E10. (Z95324) [Oryza sativa (japonica cultivar-group)] | Oryza sativa         | Function annotation |
| MGAPKQKWTSEEDALRAGVRKHGA        | gi 18463961 gb AAL73044.1 AF461815_1 | histone H1-like protein [Zea mays]                                                                       | Zea mays             | Function annotation |
| MGAPKQKWTSEEEALRRGVLKHGP        | gi 20804653 dbj BAB92342.1           | histone H1-like protein [Oryza sativa (japonica cultivar-group)]                                         | Oryza sativa         | Function annotation |
| MGARDEARPPGKRRQNPFPRANLSL       | gi 12580855 emb CAC27136.1           | 40S ribosomal protein S2 [Picea abies]                                                                   | Picea abies          | Function annotation |
| MGAYKYIEELWKKKQSDVMRFLQRV       | gi 6093872 sp O65082 R15B_PICMA      | 60S RIBOSOMAL PROTEIN L15-2                                                                              | Picea mariana        | Function annotation |
| MGAYKYIEELWRRKQSDVLRFLLRV       | gi 25295572 pir  JC7521              | ribosomal protein L15, large subunit - Tortula ruralis                                                   | Tortula ruralis      | Function annotation |
| MGAYKYVAEMERRKQSDVLRFLLRV       | gi 6094016 sp O82712 RL15_QUESU      | 60S RIBOSOMAL PROTEIN L15                                                                                | Pinus taeda          | Function annotation |
| MGAYKYVSELWRKKQSDVMRFLQRV       | gi 15236049 ref NP_193470.1          | 60S ribosomal protein L15 (RPL15B) [Arabidopsis thaliana]                                                | Arabidopsis thaliana | Function annotation |
| MGAYKYVSELWRRKQSDVMRFVQRV       | gi 28875969 gb AAO59978.1            | ribosomal protein L15 [Oryza sativa (japonica cultivar-group)]                                           | Oryza sativa         | Function annotation |
| MGAYTYVSELWRKKQSDVMRFLQRV       | gi 6094014 sp O82528 RL15_PETHY      | 60S RIBOSOMAL PROTEIN L15                                                                                | Petunia hybrida      | Function annotation |
| MGCEGDVATLDVCKGKQIENRWMA        | gi 15290088 dbj BAB63781.1           | putative RNA helicase RH2 [Oryza sativa (japonica cultivar-group)]                                       | Oryza sativa         | Function annotation |
| MGDARDNEAYEEELLDYEEDEKVP        | gi 18416493 ref NP_568245.1          | DEAD/DEAH box helicase, putative [Arabidopsis thaliana]                                                  | Arabidopsis thaliana | Function annotation |
| MGDFDGEQKELIKLVNFRMIDGKR        | gi 23495376 dbj BAC19857.1           | Ribosomal protein S7 [Oryza sativa (japonica cultivar-group)]                                            | Oryza sativa         | Function annotation |
| MGDGEIGCHAQKFFTDIFTNGIQV        | gi 15230721 ref NP_190141.1          | reverse transcriptase (RNA-dependent DNA polymerase) family protein [Arabidopsis thaliana]               | Arabidopsis thaliana | Function annotation |
| MGDIGDLLSEDEEEDQDYDFLKKK        | gi 15242854 ref NP_201168.1          | DEAD box RNA helicase, putative [Arabidopsis thaliana]                                                   | Arabidopsis thaliana | Function annotation |

| Sequence (Classified Negatives) | ID                          | Function                                                                                     | Species                | Basis for neg       |
|---------------------------------|-----------------------------|----------------------------------------------------------------------------------------------|------------------------|---------------------|
| MGDIVRQILGWFPGHPASGNGATLS       | gi 20521321 dbj BAB91835.1  | putative ribosomal RNA apurinic site specific lyase [Oryza sativa (japonica cultivar-group)] | Oryza sativa           | Function annotation |
| MGDKRKKTFMFIRLVSAAGTGFFYV       | gi 15239562 ref NP_197380.1 | ribosomal protein L33 - like [Arabidopsis thaliana]                                          | Arabidopsis thaliana   | Function annotation |
| MGDSGDPFLRNPNAAVQARAKVQNR       | gi 30693345 ref NP_850676.1 | U1 small nuclear ribonucleoprotein 70 (U1-70k) [Arabidopsis thaliana]                        | Arabidopsis thaliana   | Function annotation |
| MGDVEPEVAAAGVPPKRTFKKFAFK       | gi 2129721 pir  S71259      | ribosomal protein S15, cytosolic - Arabidopsis thaliana                                      | Arabidopsis thaliana   | Function annotation |
| MGDYGSGMMRGNPDGGGMQSRTKGQ       | gi 31429881 gb AAP51870.1   | putative U1 small nuclear ribonucleoprotein [Oryza sativa (japonica cultivar-group)]         | Oryza sativa           | Function annotation |
| MGEAEVKDNEVYEEEDLVYEEEEVEN      | gi 20521462 dbj BAB91970.1  | putative DEAD BOX RNA helicase [Oryza sativa (japonica cultivar-group)]                      | Oryza sativa           | Function annotation |
| MGEDFQHILRLLNTNVDGKQKIMFA       | gi 25553581 dbj BAC24846.1  | putative ribosomal protein S18 [Oryza sativa (japonica cultivar-group)]                      | Oryza sativa           | Function annotation |
| MGEERVEERREAMGEEVEVESEAPT       | gi 22775636 dbj BAC15490.1  | putative ATP-dependent helicase pitchoune [Oryza sativa (japonica cultivar-group)]           | Oryza sativa           | Function annotation |
| MGEGGVVVPESVLKKQKRNEEWALV       | gi 445613 prf  1909359B     | ribosomal protein L7                                                                         | Solanum tuberosum      | Function annotation |
| MGEIAVGLNKGHVTKKAGTPRPSR        | gi 25295570 pir  JC7579     | ribosomal protein L36 - green alga (Enteromorpha prolifera)                                  | Enteromorpha prolifera | Function annotation |
| MGESRVSSAGERDATMVDIGVKS RP      | gi 22331612 ref NP_680097.1 | reverse transcriptase (RNA-dependent DNA polymerase) family protein [Arabidopsis thaliana]   | Arabidopsis thaliana   | Function annotation |
| MGETRRHSVDVPITRTLVALRRVRS       | gi 15233988 ref NP_194210.1 | DNA polymerase III like protein [Arabidopsis thaliana]                                       | Arabidopsis thaliana   | Function annotation |
| MGFFKKKEKKA EFDVFRLYGLHHPE      | gi 11497566 ref NP_054974.1 | ribosomal protein L22 [Spinacia oleracea]                                                    | Spinacia oleracea      | Function annotation |

| <b>Sequence (Classified Negatives)</b> | <b>ID</b>                   | <b>Function</b>                                                                            | <b>Species</b>        | <b>Basis for neg</b> |
|----------------------------------------|-----------------------------|--------------------------------------------------------------------------------------------|-----------------------|----------------------|
| MGFKGNRFTWRRGLVESTFVAKRLD              | gi 15234647 ref NP_193294.1 | reverse transcriptase (RNA-dependent DNA polymerase) family protein [Arabidopsis thaliana] | Arabidopsis thaliana  | Function annotation  |
| MGFKRFVEIGRVALVNYGEDYGKLV              | gi 15225356 ref NP_179635.1 | 60S ribosomal protein L14 (RPL14A) [Arabidopsis thaliana]                                  | Arabidopsis thaliana  | Function annotation  |
| MGFKRYVEIGRVALVNYGEDHGKLV              | gi 15236981 ref NP_194439.1 | 60S ribosomal protein L14 (RPL14B) [Arabidopsis thaliana]                                  | Arabidopsis thaliana  | Function annotation  |
| MGFVKVVKNKQYFKRYQVKFKRRRE              | gi 7440750 pir  T12615      | ribosomal protein L5 - common sunflower                                                    | Helianthus annuus     | Function annotation  |
| MGGCDKQGFPKQGVLPGRVRLLL                | gi 1480022 dbj BAA11393.1   | putative ribosomal protein [Brassica rapa]                                                 | Brassica rapa         | Function annotation  |
| MGGESPEDYLKILSLWIRLRHIPVN              | gi 22331551 ref NP_683665.1 | reverse transcriptase (RNA-dependent DNA polymerase) family protein [Arabidopsis thaliana] | Arabidopsis thaliana  | Function annotation  |
| MGGFRFHQYQVVGRALPTENDEHPK              | gi 15231888 ref NP_188078.1 | 60S ribosomal protein L18A (RPL18aC) [Arabidopsis thaliana]                                | Arabidopsis thaliana  | Function annotation  |
| MGGFVKTQKTNAYHKRFQVKFKRRR              | gi 22093592 dbj BAC06888.1  | putative 60S ribosomal protein L5 [Oryza sativa (japonica cultivar-group)]                 | Oryza sativa          | Function annotation  |
| MGGFVKTQKTNAYYKRFQVKFKRRR              | gi 542157 pir  S39486       | ribosomal protein L5 - rice                                                                | Oryza sativa          | Function annotation  |
| MGGLDGEQKLLIKKLVNFRMKEGKR              | gi 13449397 ref NP_085579.1 | ribosomal protein S7 [Arabidopsis thaliana]                                                | Arabidopsis thaliana  | Function annotation  |
| MGGLDSEQQLIKKLVNFHMKEGKR               | gi 9838445 ref NP_064059.1  | ribosomal protein S7 [Beta vulgaris]                                                       | Beta vulgaris         | Function annotation  |
| MGGPVIERRGGSIGWVLRQNGTWWP              | gi 32470660 gb AAP45186.1   | putative micronuclear linker histone polyprotein [Solanum bulbocastanum]                   | Solanum bulbocastanum | Function annotation  |
| MGGVGKTKRMRLKRKRRKMRQRSK               | gi 7441210 pir  T06233      | ribosomal protein L41 - soybean (fragment)                                                 | Glycine max           | Function annotation  |
| MGGYFICGGMERLVRILILQKRNY               | gi 22748410 gb AAN05375.1   | putative RNA polymerase [Oryza sativa (japonica cultivar-group)]                           | Oryza sativa          | Function annotation  |

| Sequence (Classified Negatives) | ID                                   | Function                                                                             | Species                    | Basis for neg       |
|---------------------------------|--------------------------------------|--------------------------------------------------------------------------------------|----------------------------|---------------------|
| MGHSNVWNSHPKKYGPGSRLCRVCG       | gi 15229844 ref NP_189987.1          | 40S ribosomal protein S29 (RPS29B) [Arabidopsis thaliana]                            | Arabidopsis thaliana       | Function annotation |
| MGHSNVWNSHPKKNYGPSRVCRVCG       | gi 31745220 gb AAP68880.1            | putative ribosomal protein S29 [Oryza sativa (japonica cultivar-group)]              | Oryza sativa               | Function annotation |
| MGIDLIAGGKSKKTKRTAPKSDDVY       | gi 15241061 ref NP_198137.1          | 60S ribosomal protein L18 (RPL18C) [Arabidopsis thaliana]                            | Arabidopsis thaliana       | Function annotation |
| MGIDLKAGGKSKKTKRTAPKSNDIY       | gi 28798549 gb AAO46881.1            | 60S ribosomal protein [Medicago sativa]                                              | Medicago sativa            | Function annotation |
| MGIDLVAGGRNKTKRTAPRSDDVY        | gi 14595709 gb AAK70908.1 AC087551_7 | cytoplasmic ribosomal protein L18 [Oryza sativa]                                     | Oryza sativa               | Function annotation |
| MGIDLVAGGRNKTKRTAPRSEDVY        | gi 34393858 dbj BAC83538.1           | putative cytoplasmic ribosomal protein L18 [Oryza sativa (japonica cultivar-group)]  | Oryza sativa               | Function annotation |
| MGIKKGEKVDYSLNQSGLVEASPY        | gi 24476045 gb AAN62787.1            | Putative DEAD/DEAH box RNA helicase protein [Oryza sativa (japonica cultivar-group)] | Oryza sativa               | Function annotation |
| MGIRFLQAYTPGTRNRSVSDFSELT       | gi 28269737 tpg DAA00915.1           | TPA: ribosomal protein L2 [Chlamydomonas reinhardtii]                                | Chlamydomonas reinhardtii  | Function annotation |
| MGIRFYRAHTPGTRNRSVSDFHEIT       | gi 5880705 gb AAD54798.1 AF137379_21 | ribosomal protein L2 [Nephroselmis olivacea]                                         | Nephroselmis olivacea      | Function annotation |
| MGIRLYKAYTPGTRNRSISDFKELK       | gi 22711952 ref NP_683843.1          | ribosomal protein L2 [Chaetosphaeridium globosum]                                    | Chaetosphaeridium globosum | Function annotation |
| MGIRLYKAYTPGTRNRSVLEFNDIT       | gi 11466368 ref NP_038371.1          | ribosomal protein L2 [Mesostigma viride]                                             | Mesostigma viride          | Function annotation |
| MGIRSYRAYTPGTRNRSVSEFTEIN       | gi 14548219 sp O98452 RK2_SPIMX      | Chloroplast 50S ribosomal protein L2                                                 | Spirogyra maxima           | Function annotation |
| MGISRDSIHKRRATGGKQKMWRKKR       | gi 30697195 ref NP_200732.2          | 40S ribosomal protein S8 (RPS8B) [Arabidopsis thaliana]                              | Arabidopsis thaliana       | Function annotation |
| MGISRDSIHKRRATGGKQKQWRKKR       | gi 15241316 ref NP_197529.1          | 40S ribosomal protein S8 (RPS8A) [Arabidopsis thaliana]                              | Arabidopsis thaliana       | Function annotation |
| MGISRDSMHKRRATGGKKKAWRKKR       | gi 17367479 sp O81361 RS8_PRUAR      | 40S ribosomal protein S8                                                             | Prunus armeniaca           | Function annotation |
| MGISSLFPVQVAVWHETIGPGGFER       | gi 25307616 pir  E85175              | ATP-dependent RNA helicase like protein [imported] - Arabidopsis thaliana            | Arabidopsis thaliana       | Function annotation |

| Sequence (Classified Negatives) | ID                                  | Function                                                                                     | Species              | Basis for neg       |
|---------------------------------|-------------------------------------|----------------------------------------------------------------------------------------------|----------------------|---------------------|
| MGITTRARGKRRKLQGHQTPPPPPP       | gi 22831229 dbj BAC16087.1          | putative ribosomal RNA apurinic site specific lyase [Oryza sativa (japonica cultivar-group)] | Oryza sativa         | Function annotation |
| MGKDTIADIITCIRNADMNRKGTVR       | gi 11497562 ref NP_054970.1         | ribosomal protein S8 [Spinacia oleracea]                                                     | Spinacia oleracea    | Function annotation |
| MGKDTIADIITSIRNADMNKKGTVR       | gi 6831644 sp Q42362 RR8_MUSAC      | Chloroplast 30S ribosomal protein S8                                                         | Musa acuminata       | Function annotation |
| MGKDTIADIITSIRNADMNRKGTVR       | gi 7525068 ref NP_051093.1          | ribosomal protein S8 [Arabidopsis thaliana]                                                  | Arabidopsis thaliana | Function annotation |
| MGKDTIADIITSIRNADMNRKRTVQ       | gi 13518473 ref NP_084832.1         | ribosomal protein S8 [Lotus corniculatus var. japonicus]                                     | Lotus corniculatus   | Function annotation |
| MGKDTIADLLTSIRNADMNKKGIVR       | gi 22296315 dbj BAC10086.1          | Chloroplast 50S ribosomal protein S8 [Oryza sativa (japonica cultivar-group)]                | Oryza sativa         | Function annotation |
| MGKDTIADLLTSIRNADMNKKGTVR       | gi 14017607 ref NP_114293.1         | ribosomal protein S8 [Triticum aestivum]                                                     | Triticum aestivum    | Function annotation |
| MGKDTIANIITYIRNADMNKKGMVQ       | gi 24212272 sp P59033 RR8_PHAAN     | Chloroplast 30S ribosomal protein S8                                                         | Phaseolus angularis  | Function annotation |
| MGKFMKPGKVVLVLAGRYSGRKAVI       | gi 445615 prf  1909362A             | ribosomal protein L27                                                                        | Pisum sativum        | Function annotation |
| MGKGTGSFGKRRNKSHLTCVRCGRR       | gi 18401007 ref NP_566535.1         | 60S ribosomal protein L37 (RPL37C) [Arabidopsis thaliana]                                    | Arabidopsis thaliana | Function annotation |
| MGKREIHFTPVGRQVQRVLEYPLRL       | gi 28973767 gb AAO64199.1           | putative transformer-SR ribonucleoprotein [Arabidopsis thaliana]                             | Arabidopsis thaliana | Function annotation |
| MGKRKQRGGGGGGGAATEGGAATG        | gi 29150367 gb AAO72376.1           | putative RNA binding ribonucleoprotein [Oryza sativa (japonica cultivar-group)]              | Oryza sativa         | Function annotation |
| MGKTHGMGAARKLKSHRRTQRWADK       | gi 6716785 gb AAF26742.1 AF220539_1 | 40s ribosomal protein S23 [Euphorbia esula]                                                  | Euphorbia esula      | Function annotation |
| MGKTIQVFGFPNGVSAEEVKKFLER       | gi 15223906 ref NP_172932.1         | RNA-dependent RNA polymerase, putative [Arabidopsis thaliana]                                | Arabidopsis thaliana | Function annotation |
| MGKTIQVFGFPYLLSAEAVKKFLEN       | gi 4138282 emb CAA09697.1           | RNA-directed RNA polymerase [Nicotiana tabacum]                                              | Nicotiana tabacum    | Function annotation |

| Sequence (Classified Negatives) | ID                          | Function                                                                                       | Species                 | Basis for neg       |
|---------------------------------|-----------------------------|------------------------------------------------------------------------------------------------|-------------------------|---------------------|
| MGKTIQVFGFPYLLSAEVVKSFLEK       | gi 7489070 pir  T30819      | RNA-directed RNA polymerase (EC 2.7.7.48) - tomato                                             | Lycopersicon esculentum | Function annotation |
| MGKTKLKPVEDVNSEVVDEVEKAEE       | gi 15236218 ref NP_195217.1 | DEAD/DEAH box helicase, putative [Arabidopsis thaliana]                                        | Arabidopsis thaliana    | Function annotation |
| MGKTRGMGAARKLKNHRRRQRWADK       | gi 1362041 pir  S56673      | ribosomal protein S23.e, cytosolic (clone RJ3) - garden strawberry                             | Fragaria ananassa       | Function annotation |
| MGKTRGMGAGRKLKQLRITQRWADK       | gi 18398604 ref NP_566351.1 | 40S ribosomal protein S23 (RPS23A) [Arabidopsis thaliana]                                      | Arabidopsis thaliana    | Function annotation |
| MGKTRGMGAGRKLKRLRINQRWADK       | gi 15242574 ref NP_195916.1 | 40S ribosomal protein S23 (RPS23B) [Arabidopsis thaliana]                                      | Arabidopsis thaliana    | Function annotation |
| MGKTRGMGAGRKLKTHRRNQRWADK       | gi 21671348 dbj BAC02684.1  | 40S ribosomal protein [Oryza sativa (japonica cultivar-group)]                                 | Oryza sativa            | Function annotation |
| MGKVHGSLARAGKVRGQTPKVAKQD       | gi 18399137 ref NP_565458.1 | 40S ribosomal protein S30 (RPS30A) [Arabidopsis thaliana]                                      | Arabidopsis thaliana    | Function annotation |
| MGKVHGSLARAGKVRGQTPKVAKQE       | gi 27527721 emb CAC86461.1  | putative 40S ribosomal protein S30 [Polytomella sp. Pringsheim 198.80]                         | Polytomella sp.         | Function annotation |
| MGKVSKADKKIAYDQKLCQLDDYN        | gi 22759727 dbj BAC10912.1  | putative 60S acidic ribosomal protein P0 [Zinnia elegans]                                      | Zinnia elegans          | Function annotation |
| MGKYKAPGPDGFQPVFYQDCWDIVG       | gi 15226038 ref NP_178766.1 | reverse transcriptase (RNA-dependent DNA polymerase), putative [Arabidopsis thaliana]          | Arabidopsis thaliana    | Function annotation |
| MGLDQEDLDLTNDDHFIDKEKLSAP       | gi 30694705 ref NP_199327.2 | DNA-directed RNA polymerase subunit [Arabidopsis thaliana]                                     | Arabidopsis thaliana    | Function annotation |
| MGLFLLYSKLSQSEAVREAITIKGK       | gi 25294932 pir  A84674     | 60S ribosomal protein L10A [imported] - Arabidopsis thaliana                                   | Arabidopsis thaliana    | Function annotation |
| MGLVFRPTIHRPRSTAVIRRMKFI        | gi 9049466 dbj BAA99431.1   | putative 60S acidic ribosomal protein P2A [Oryza sativa (japonica cultivar-group)]             | Oryza sativa            | Function annotation |
| MGNALPLTDMPLGTAIHNIEITRGR       | gi 34394232 dbj BAC84684.1  | ribosomal protein L2, chloroplast [Oryza sativa (japonica cultivar-group)]                     | Oryza sativa            | Function annotation |
| MGNDERKRPTKKMKYGGKDDQKMKN       | gi 18422089 ref NP_568591.1 | TFIIH basal transcription factor complex helicase XPB subunit, putative [Arabidopsis thaliana] | Arabidopsis thaliana    | Function annotation |

| Sequence (Classified Negatives) | ID                                   | Function                                                                                             | Species                       | Basis for neg          |
|---------------------------------|--------------------------------------|------------------------------------------------------------------------------------------------------|-------------------------------|------------------------|
| MGNDIIANMITAIRNANLGRAETVE       | gi 28202208 ref NP_777449.1          | ribosomal protein S8<br>[Anthoceros formosae]                                                        | Anthoceros<br>formosae        | Function<br>annotation |
| MGNDTIANLITSIRNADMVEKGTVR       | gi 29565645 ref NP_817224.1          | ribosomal protein S8 [Pinus<br>koraiensis]                                                           | Pinus koraiensis              | Function<br>annotation |
| MGNDTIANMITSIRNANLEKTKTVQ       | gi 34501440 ref NP_904227.1          | ribosomal protein S8<br>[Physcomitrella patens subsp.<br>patens]                                     | Physcomitrella<br>patens      | Function<br>annotation |
| MGNDTIANMITSIRNANLGKIKTVQ       | gi 11466739 ref NP_039335.1          | ribosomal protein S8<br>[Marchantia polymorpha]                                                      | Marchantia<br>polymorpha      | Function<br>annotation |
| MGNDTITNLITSIRNADMVEKGTVR       | gi 7524688 ref NP_042442.1           | ribosomal protein S8 [Pinus<br>thunbergii]                                                           | Pinus thunbergii              | Function<br>annotation |
| MGN GERGRPNKKMKYGGKDDQKMKN      | gi 18422091 ref NP_568592.1          | TFIIH basal transcription factor<br>complex helicase XPB subunit,<br>putative [Arabidopsis thaliana] | Arabidopsis thaliana          | Function<br>annotation |
| MGNSKMLGDEKEGTS AIPGFNQIQ       | gi 2196464 emb CAA74024.1            | DNA-dependent RNA<br>polymerase subunit beta<br>[Arabidopsis thaliana]                               | Arabidopsis thaliana          | Function<br>annotation |
| MGNVIKSQVGAQALGKNVRVSVTKM       | gi 30352072 ref NP_848099.1          | ribosomal protein L22<br>[Adiantum capillus-veneris]                                                 | Adiantum capillus-<br>veneris | Function<br>annotation |
| MGPLRPRLRSRRDRHG VVRRLPRR       | gi 34393244 dbj BAC83094.1           | putative 60S acidic ribosomal<br>protein [Oryza sativa (japonica<br>cultivar-group)]                 | Oryza sativa                  | Function<br>annotation |
| MGPPDVVPSEHVEFDSDVFGPSPT        | gi 7649389 emb CAB89082.1            | S6 ribosomal protein kinase<br>[Asparagus officinalis]                                               | Asparagus<br>officinalis      | Function<br>annotation |
| MGPSLQLQFHYEDILRQELLLKLN Y      | gi 31322691 gb AAP33162.1            | ribosomal protein L5 [Cucumis<br>sativus]                                                            | Cucumis sativus               | Function<br>annotation |
| MGQKIHPLGFRLGITQQHRSTWFAP       | gi 5880703 gb AAD54796.1 AF137379_19 | ribosomal protein S3<br>[Nephroselmis olivacea]                                                      | Nephroselmis<br>olivacea      | Function<br>annotation |
| MGQKIHPLGFRLGTTQNHCSYWFAQ       | gi 18860350 ref NP_569667.1          | ribosomal protein S3 [Psilotum<br>nudum]                                                             | Psilotum nudum                | Function<br>annotation |
| MGQKIHPLGFRLGVTQEHL SNWFAR      | gi 27734479 sp O98455 RR3_SPIMX      | Chloroplast 30S ribosomal<br>protein S3                                                              | Spirogyra maxima              | Function<br>annotation |
| MGQKIHPLGFRLGVTQEHR AHWFAK      | gi 11466365 ref NP_038368.1          | ribosomal protein S3<br>[Mesostigma viride]                                                          | Mesostigma viride             | Function<br>annotation |
| MGQKINPLGFRLGENQSHHSLWFAQ       | gi 32480881 ref NP_862792.1          | ribosomal protein S3<br>[Calycanthus floridus var.<br>glaucus]                                       | Calycanthus<br>floridus       | Function<br>annotation |



| Sequence (Classified Negatives) | ID                                    | Function                                                            | Species                   | Basis for neg       |
|---------------------------------|---------------------------------------|---------------------------------------------------------------------|---------------------------|---------------------|
| MGQKINPLGFRLGITQNHRSYWFAN       | gi 11466742 ref NP_039338.1           | ribosomal protein S3 [Marchantia polymorpha]                        | Marchantia polymorpha     | Function annotation |
| MGQKINPLGFRLGTTQGHHSWFSQ        | gi 28261755 ref NP_783269.1           | ribosomal protein S3 [Atropa belladonna]                            | Atropa belladonna         | Function annotation |
| MGQKINPLGFRLGTTQKHHSWFAQ        | gi 14017610 ref NP_114296.1           | ribosomal protein S3 [Triticum aestivum]                            | Triticum aestivum         | Function annotation |
| MGQKINPLGFRLGTTQNHHSWFAQ        | gi 11467230 ref NP_043062.1           | ribosomal protein S3 [Zea mays]                                     | Zea mays                  | Function annotation |
| MGQKINPLGFRLGTTQSHDSIWFAQ       | gi 13518476 ref NP_084835.1           | ribosomal protein S3 [Lotus corniculatus var. japonicus]            | Lotus corniculatus        | Function annotation |
| MGQKINPLGFRLGTTQSHHSWFAQ        | gi 11466969 ref NP_054390.1           | ribosomal protein S3 [Epifagus virginiana]                          | Epifagus virginiana       | Function annotation |
| MGQKINPLGFRLGTTQSHHSWFAQ        | gi 7525071 ref NP_051096.1            | ribosomal protein S3 [Arabidopsis thaliana]                         | Arabidopsis thaliana      | Function annotation |
| MGQKINPLGFRLGTTQSHRSLWFAQ       | gi 34500952 ref NP_904137.1           | ribosomal protein S3 [Amborella trichopoda]                         | Amborella trichopoda      | Function annotation |
| MGQKINPLGFRLGTTQSHYSLWFSQ       | gi 11497565 ref NP_054973.1           | ribosomal protein S3 [Spinacia oleracea]                            | Spinacia oleracea         | Function annotation |
| MGQKINPLGFRLGVTQNHCSHWFAK       | gi 28202211 ref NP_777452.1           | ribosomal protein S3 [Anthoceros formosae]                          | Anthoceros formosae       | Function annotation |
| MGQKINPLGFRLGVTQNHHSYWFAN       | gi 34501443 ref NP_904230.1           | ribosomal protein S3 [Physcomitrella patens subsp. patens]          | Physcomitrella patens     | Function annotation |
| MGQKSNPQALRTAAPYQQHESCWYH       | gi 17222576 gb AAL36749.1 AF353999_29 | ribosomal protein S3 [Mesostigma viride]                            | Mesostigma viride         | Function annotation |
| MGQKTNPISLRLQNVNRNFDSCWYS       | gi 11497487 ref NP_042277.1           | ribosomal protein S3 [Prototheca wickerhamii]                       | Prototheca wickerhamii    | Function annotation |
| MGQKVHPFGFRVGITKKHQSQWFAK       | gi 632229 pir  S40460                 | ribosomal protein S3 - Chlamydomonas frankii chloroplast (fragment) | Chlamydomonas frankii     | Function annotation |
| MGQKVHPIGFRLGITQKHRSYWCTT       | gi 7524928 ref NP_045930.1            | ribosomal protein S3 [Chlorella vulgaris]                           | Chlorella vulgaris        | Function annotation |
| MGQKVHPLGFRVGITKKHQSQWFAR       | gi 28269769 tpg DAA00947.1            | TPA: ribosomal protein S3 [Chlamydomonas reinhardtii]               | Chlamydomonas reinhardtii | Function annotation |
| MGQKVHPSGFRVGITKKHQSQWFAR       | gi 1173249 sp P46307 RR3_CHLEU        | Chloroplast 30S ribosomal protein S3                                | Chlamydomonas eugametos   | Function annotation |

| Sequence (Classified Negatives) | ID                                   | Function                                                                                                                    | Species                    | Basis for neg       |
|---------------------------------|--------------------------------------|-----------------------------------------------------------------------------------------------------------------------------|----------------------------|---------------------|
| MGQKVNPISLRRLPINRSVDCLWFSD      | gi 6066169 gb AAF03187.1 AF110138_19 | ribosomal protein S3 [Nephroselmis olivacea]                                                                                | Nephroselmis olivacea      | Function annotation |
| MGQKVNPLGFRLGVTQEHHSYWFAT       | gi 22711972 ref NP_683840.1          | ribosomal protein S3 [Chaetosphaeridium globosum]                                                                           | Chaetosphaeridium globosum | Function annotation |
| MGQYTINLRESYPVWKIGSKIDSTK       | gi 7388083 sp O98462 RPOA_SPIMX      | DNA-directed RNA polymerase alpha chain (PEP) (Plastid-encoded RNA polymerase alpha subunit) (RNA polymerase alpha subunit) | Spirogyra maxima           | Function annotation |
| MGRDTIADIITSIRNVDMNRKGTVR       | gi 13518369 ref NP_084728.1          | ribosomal protein S8 [Oenothera elata subsp. hookeri]                                                                       | Oenothera elata            | Function annotation |
| MGRDTIADILTSIRNANMDKKGTVR       | gi 32480878 ref NP_862789.1          | ribosomal protein S8 [Calycanthus floridus var. glaucus]                                                                    | Calycanthus floridus       | Function annotation |
| MGRDTIAEIITSIRNADMDRKR VVR      | gi 28261752 ref NP_783266.1          | ribosomal protein S8 [Atropa belladonna]                                                                                    | Atropa belladonna          | Function annotation |
| MGRDTIANIITCIRNADMDKCRMVR       | gi 34500949 ref NP_904134.1          | ribosomal protein S8 [Amborella trichopoda]                                                                                 | Amborella trichopoda       | Function annotation |
| MGRDTILEIINSIRNADRGRKR VVR      | gi 11466967 ref NP_054388.1          | ribosomal protein S8 [Epifagus virginiana]                                                                                  | Epifagus virginiana        | Function annotation |
| MGRGKTPNLGEFRVATDQSASRKIS       | gi 26399124 sp P59152 RR4_WOOUN      | Chloroplast 30S ribosomal protein S4                                                                                        | Woodwardia unigemmata      | Function annotation |
| MGRKIHPLGFRLGV SXKHYSYRFAQ      | gi 30352071 ref NP_848098.1          | ribosomal protein S3 [Adiantum capillus-veneris]                                                                            | Adiantum capillus-veneris  | Function annotation |
| MGRLAIRPNRSRLTWLRENKNTHPI       | gi 19571093 dbj BAB86518.1           | ribosomal RNA apurinic site specific lyase-like protein [Oryza sativa (japonica cultivar-group)]                            | Oryza sativa               | Function annotation |
| MGRLHSGKGGISSALPYRRTAPSW        | gi 480095 pir  S36423                | ribosomal protein S13, cytosolic - garden pea                                                                               | Pisum sativum              | Function annotation |
| MGRLIRAQRKGAGSVFKSHTHHRKG       | gi 7440614 pir  S22641               | ribosomal protein L2, cytosolic - common tobacco                                                                            | Nicotiana tabacum          | Function annotation |
| MGRMH SRGKGISASALPYKRSSPSW      | gi 18411716 ref NP_567104.1          | 40S ribosomal protein S13 (RPS13A) [Arabidopsis thaliana]                                                                   | Arabidopsis thaliana       | Function annotation |
| MGRMH SRGKGISASALPYKRTPPSW      | gi 8131699 dbj BAA96366.1            | cytoplasmic ribosomal protein S13 [Panax ginseng]                                                                           | Panax ginseng              | Function annotation |

| Sequence (Classified Negatives) | ID                               | Function                                                                                          | Species                 | Basis for neg       |
|---------------------------------|----------------------------------|---------------------------------------------------------------------------------------------------|-------------------------|---------------------|
| MGRMHSSGKGMSCSVLPYRRAAPAW       | gi 34393549 dbj BAC83147.1       | putative 40S RIBOSOMAL PROTEIN S13 [Oryza sativa (japonica cultivar-group)]                       | Oryza sativa            | Function annotation |
| MGRMKKIFFNQKSDLNSMKLFFCNR       | gi 11466380 ref NP_038383.1      | RNA polymerase beta" subunit [Mesostigma viride]                                                  | Mesostigma viride       | Function annotation |
| MGRRILNDALRTIVNAEKRGKASVE       | gi 15224834 ref NP_179562.1      | 40S ribosomal protein S15A (RPS15aB) [Arabidopsis thaliana]                                       | Arabidopsis thaliana    | Function annotation |
| MGRRILNDALRTIVNAERRGKASVE       | gi 15233571 ref NP_194672.1      | 40S ribosomal protein S15A (RPS15aE) [Arabidopsis thaliana]                                       | Arabidopsis thaliana    | Function annotation |
| MGRRPARCNRQIKNKPYPKSRYCRG       | gi 1076752 pir  S49596           | ribosomal protein L10.e, cytosolic - rice                                                         | Oryza sativa            | Function annotation |
| MGRRPARCYRQIKGKPYPKSRYCRG       | gi 30683726 ref NP_563945.2      | 60S ribosomal protein L10 (RPL10A)/Wilm's tumor suppressor protein-related [Arabidopsis thaliana] | Arabidopsis thaliana    | Function annotation |
| MGRRPARCYRQIKNKPYPKSRFCRG       | gi 18203270 sp Q9M5M7 RL10_EUPES | 60S ribosomal protein L10                                                                         | Euphorbia esula         | Function annotation |
| MGRRPARCYRQIKNKPYPKSRYCRG       | gi 6093994 sp O22431 RL10_PINTA  | 60S ribosomal protein L10 (Wilm's tumor suppressor homolog)                                       | Pinus taeda             | Function annotation |
| MGRSMLPEQQEDVSRKSKKEKSKK        | gi 34394349 dbj BAC84904.1       | putative RNA helicase [Oryza sativa (japonica cultivar-group)]                                    | Oryza sativa            | Function annotation |
| MGRVIRAHVEGAGSVFKSHTHRKG        | gi 12054507 emb CAC20221.1       | ribosomal protein L2 [Glycine max]                                                                | Glycine max             | Function annotation |
| MGRVIRAQRKGAAGSVFKSHTHRK        | gi 15230421 ref NP_190687.1      | 60S ribosomal protein L8 (RPL8B) [Arabidopsis thaliana]                                           | Arabidopsis thaliana    | Function annotation |
| MGRVIRAQRKGAGSVFKSHTHRKG        | gi 15234298 ref NP_195336.1      | 60S ribosomal protein L8 (RPL8C) [Arabidopsis thaliana]                                           | Arabidopsis thaliana    | Function annotation |
| MGRVIRTQRKGRGSIFTSNNTHRKG       | gi 6440928 dbj BAA78597.1        | 60S ribosomal protein L2 [Chlamydomonas sp. HS-5]                                                 | Chlamydomonas sp.       | Function annotation |
| MGRVRTKTVKKSSRQVIEKYSRMT        | gi 30680641 ref NP_850765.1      | 40S ribosomal protein S17 (RPS17D) [Arabidopsis thaliana]                                         | Arabidopsis thaliana    | Function annotation |
| MGRVRTKTVKKSSRQVIERYYSKMT       | gi 20141760 sp P49215 RS17_LYCES | 40S ribosomal protein S17                                                                         | Lycopersicon esculentum | Function annotation |

| Sequence (Classified Negatives) | ID                              | Function                                                                                  | Species                   | Basis for neg       |
|---------------------------------|---------------------------------|-------------------------------------------------------------------------------------------|---------------------------|---------------------|
| MGRVRTKTVKKTSRQVIEKYYSRMT       | gi 31432043 gb AAP53735.1       | contains similarity to 40S ribosomal protein S17 [Oryza sativa (japonica cultivar-group)] | Oryza sativa              | Function annotation |
| MGSDTEAEKSIQKEKKKYAITLAPI       | gi 15241537 ref NP_196435.1     | ribosomal protein L7Ae family [Arabidopsis thaliana]                                      | Arabidopsis thaliana      | Function annotation |
| MGSEGNMKKSVVTQVSIGGFGEESTT      | gi 15229153 ref NP_190519.1     | RNA-dependent RNA polymerase SDE1 [Arabidopsis thaliana]                                  | Arabidopsis thaliana      | Function annotation |
| MGSLVQGDFFQHILRLLNTNVDGKN       | gi 1350947 sp P49202 RS18_CHLRE | 40S ribosomal protein S18                                                                 | Chlamydomonas reinhardtii | Function annotation |
| MGSNDLNTWVSDKLMVLLGFSQTAV       | gi 15226961 ref NP_181077.1     | RNA helicase, putative [Arabidopsis thaliana]                                             | Arabidopsis thaliana      | Function annotation |
| MGSQLSNAIDGKDNTKTIGSADPDQ       | gi 22328663 ref NP_680697.1     | RNA helicase -related [Arabidopsis thaliana]                                              | Arabidopsis thaliana      | Function annotation |
| MGSRGRMLFDLNELPTEAEAAAAAV       | gi 31429906 gb AAP51895.1       | putative DNA2-NAM7 helicase family protein [Oryza sativa (japonica cultivar-group)]       | Oryza sativa              | Function annotation |
| MGSRVPIETIEEDGEFDWEAAVKEI       | gi 15219634 ref NP_174785.1     | DEAD/DEAH box helicase, putative [Arabidopsis thaliana]                                   | Arabidopsis thaliana      | Function annotation |
| MGSVKRKSVEESSDSAPPQKVQRED       | gi 15218905 ref NP_176185.1     | ATP-dependent RNA helicase, putative [Arabidopsis thaliana]                               | Arabidopsis thaliana      | Function annotation |
| MGTERKRKVSFLDVMEDPSLSSKNT       | gi 15226549 ref NP_182247.1     | RNA helicase, putative [Arabidopsis thaliana]                                             | Arabidopsis thaliana      | Function annotation |
| MGTNEVTRIVTDEEKREAKNFNIFD       | gi 15219773 ref NP_176261.1     | RNA polymerase subunit [Arabidopsis thaliana]                                             | Arabidopsis thaliana      | Function annotation |
| MGTVLKVVDNSGAKKVMCIQALKGK       | gi 9757736 dbj BAB08261.1       | 50S ribosomal protein L14 [Arabidopsis thaliana]                                          | Arabidopsis thaliana      | Function annotation |
| MGVDPFKTTETLEADKETNGGVPVK       | gi 15239967 ref NP_196805.1     | RNA helicase, putative [Arabidopsis thaliana]                                             | Arabidopsis thaliana      | Function annotation |
| MGVFSFVCKSKGGEWTAQHEGDLE        | gi 15242089 ref NP_200539.1     | 60S acidic ribosomal protein P3 (RPP3B) [Arabidopsis thaliana]                            | Arabidopsis thaliana      | Function annotation |
| MGVFTFVCKNGGGAWSAQHEGELE        | gi 15236029 ref NP_194319.1     | 60S acidic ribosomal protein P3 (RPP3A) [Arabidopsis thaliana]                            | Arabidopsis thaliana      | Function annotation |
| MGVLYRNSFMGYSSAHPHQHFAGEL       | gi 3901091 emb CAA06965.1       | arbuscular mycorrhiza protein [Pisum sativum]                                             | Pisum sativum             | Function annotation |
| MGVSKTGAFRLGLYGNLNVQSSVQE       | gi 19912795 dbj BAB40805.2      | Poll-like DNA polymerase [Oryza sativa]                                                   | Oryza sativa              | Function annotation |

| <b>Sequence (Classified Negatives)</b> | <b>ID</b>                   | <b>Function</b>                                                                        | <b>Species</b>       | <b>Basis for neg</b>   |
|----------------------------------------|-----------------------------|----------------------------------------------------------------------------------------|----------------------|------------------------|
| MGVSLRHLSPSSFVWSRRPRVSSSI              | gi 30685835 ref NP_188690.2 | DNA polymerase -related<br>[Arabidopsis thaliana]                                      | Arabidopsis thaliana | Function<br>annotation |
| MGVSLTSHNNPLLRHLSPSSSWVSR              | gi 25405411 pir  D96545     | probable DNA polymerase A<br>family protein [imported] -<br>Arabidopsis thaliana       | Arabidopsis thaliana | Function<br>annotation |
| MGVYTFVCRNNGGEWTAKQHSGEIE              | gi 7489709 pir  T02037      | acidic ribosomal protein P3a -<br>maize                                                | Zea mays             | Function<br>annotation |
| MGWKAAEKLIRHWKILRGDNVMIR               | gi 22327012 ref NP_680212.1 | 50S ribosomal protein L24,<br>chloroplast precursor -related<br>[Arabidopsis thaliana] | Arabidopsis thaliana | Function<br>annotation |
| MGYVKVVKTSPTYFSRYQVKYRRRRQ             | gi 7440744 pir  T08009      | probable ribosomal protein L5 -<br>green alga (Dunaliella salina)                      | Dunaliella salina    | Function<br>annotation |

**Supplementary Table 3.** Plant proteins used to supplement training set, to build a second generation of HMM models.

| Sequence (Supplementary positive) | HMM <sub>80</sub> score | ID                                  | Description                                                                        |
|-----------------------------------|-------------------------|-------------------------------------|------------------------------------------------------------------------------------|
| MGGCASRPKESDMQNEEGSVPNKPV         | 17.2                    | gi 15229163 ref NP_190523.1         | expressed protein [Arabidopsis thaliana]                                           |
| MGLCTSKPNSSNSDQTPARNSPLPA         | 16.1                    | gi 15229785 ref NP_190622.1         | calcium-dependent protein kinase, putative (CDPK) [Arabidopsis thaliana]           |
| MGACFSSHTATAAADGGSGKRQQRK         | 16.0                    | gi 6689920 gb AAF23900.1 AF194413_1 | calcium-dependent protein kinase [Oryza sativa]                                    |
| MGLSFGKLFSLFAKKEMRILMVGL          | 15.9                    | gi 15228723 ref NP_191788.1         | ADP-ribosylation factor [Arabidopsis thaliana]                                     |
| MGLTFTKLF SRLFSKKEMRILMVGL        | 15.4                    | gi 7242921 dbj BAA92519.1           | unnamed protein product [Oryza sativa (japonica cultivar-group)]                   |
| MGLAFGKLF SRLFAKKEMRILMVGL        | 15.3                    | gi 27261078 dbj BAC45192.1          | ADP-ribosylation factor 1 [Oryza sativa (japonica cultivar-group)]                 |
| MGGCVSTPKSCV GAKLRSSKRRKSR        | 15.3                    | gi 15218522 ref NP_172512.1         | expressed protein [Arabidopsis thaliana]                                           |
| MGVCFKASKPSGNGYQPPPPQPYK          | 14.9                    | gi 28866604 emb CAD70165.1          | calcium-dependent protein kinase [Spirodela punctata]                              |
| MGNCCVTPPQTGSPLKNKKNKPNPF         | 14.6                    | gi 2665890 gb AAB88537.1            | calcium-dependent protein kinase [Fragaria x ananassa]                             |
| MGSCVSKGKGDDDSVHNVEFSGGNV         | 14.5                    | gi 15231958 ref NP_187483.1         | thioredoxin family [Arabidopsis thaliana]                                          |
| MGGCCCCSSRRADVDNGPAYYYYP          | 14.5                    | gi 18422087 ref NP_568590.1         | zinc finger (C3HC4-type RING finger) protein family [Arabidopsis thaliana]         |
| MGQCCSRAPAPDSGRGGTNGYGYSN         | 14.2                    | gi 7428011 pir T02993               | calcium-dependent protein kinase (EC 2.7.1.-) 9 - maize                            |
| MGNCCVTPEGSGRGRKKQQEQKQK          | 14.0                    | gi 34393291 dbj BAC83205.1          | putative calcium-dependent protein kinase [Oryza sativa (japonica cultivar-group)] |
| MGCVC GKPSAIEDSKDSPRERFSSK        | 13.9                    | gi 15219169 ref NP_175713.1         | cell division-related protein -related [Arabidopsis thaliana]                      |
| MGACFSVAISCDQAVNNLTSCLSRN         | 13.8                    | gi 15239105 ref NP_196159.1         | disease resistance protein (CC-NBS-LRR class), putative [Arabidopsis thaliana]     |
| MGLRFTKALSRLFGKKEMRILMVGL         | 13.7                    | gi 1703374 sp P51821 ARF1_CHLRE     | ADP-ribosylation factor 1                                                          |
| MGGCTSKPSTSSGRPNPFAPGNDYP         | 13.7                    | gi 15222781 ref NP_175381.1         | calcium-dependent protein kinase, putative (CDPK) [Arabidopsis thaliana]           |

| Sequence (Supplementary positive) | HMM <sub>80</sub> score | ID                                   | Description                                                                                   |
|-----------------------------------|-------------------------|--------------------------------------|-----------------------------------------------------------------------------------------------|
| MGICVSKSPEPDLHNNHTSIPVND          | 13.5                    | gi 1706130 sp P53681 CRK_DAUCA       | CDPK-related protein kinase (PK421)                                                           |
| MGGCVSTPKSCVGGKIRSSKRRKTR         | 13.5                    | gi 18406410 ref NP_564750.1          | expressed protein CW14 [Arabidopsis thaliana]                                                 |
| MGSKYSKATNSINDASNLSYGVPFE         | 13.5                    | gi 8547231 gb AAF76307.1             | Fen kinase [Lycopersicon pimpinellifolium]                                                    |
| MGCFASRPNDTGGNRRKPTSIGDVS         | 13.4                    | gi 15219459 ref NP_177482.1          | expressed protein [Arabidopsis thaliana]                                                      |
| MGCSHSKLDDEEAVQICKDRKRFIK         | 13.4                    | gi 15224715 ref NP_179499.1          | hypothetical protein [Arabidopsis thaliana]                                                   |
| MGACASKPKESDIVEGSVSTENAVV         | 13.3                    | gi 18417019 ref NP_567777.1          | expressed protein [Arabidopsis thaliana]                                                      |
| MGGCHAKPLTHEEADGACSPPRERP         | 13.1                    | gi 33146627 dbj BAC79915.1           | putative CDPK-related protein kinase [Oryza sativa (japonica cultivar-group)]                 |
| MGNVISGSRPENHRDRTSPYPNP           | 13.0                    | gi 15231808 ref NP_190909.1          | expressed protein [Arabidopsis thaliana]                                                      |
| MGCAASKLDNEDAVRRCKDRRRLMK         | 12.9                    | gi 30695172 ref NP_191591.2          | bZIP protein [Arabidopsis thaliana]                                                           |
| MGGCVSSQRKLSNKLQKKQKRGRS          | 12.8                    | gi 15223005 ref NP_172850.1          | expressed protein [Arabidopsis thaliana]                                                      |
| MGLCSSSARRDAGTPGGGNGAGNK          | 12.7                    | gi 12592069 gb AAF23901.2 AF194414_1 | calcium-dependent protein kinase [Oryza sativa]                                               |
| MGCFASTPKDSGGNRRKPTSIGEVS         | 12.5                    | gi 15220908 ref NP_173236.1          | hypothetical protein [Arabidopsis thaliana]                                                   |
| MGCVSSKILSKSGSFQEKVVSHGFK         | 12.4                    | gi 5257280 dbj BAA81779.1            | Similar to neurofilament triplet M protein. (P07197) [Oryza sativa (japonica cultivar-group)] |
| MGSCLAKPAESAEQKKASSVSPPPP         | 12.3                    | gi 33591148 gb AAQ23078.1            | gliding motility related CaM kinase [Chlamydomonas reinhardtii]                               |
| MGHCCSKGVTADNDGHVVSVDGNS          | 12.2                    | gi 16904222 gb AAL30818.1 AF435450_1 | calcium/calmodulin-dependent protein kinase CaMK1 [Nicotiana tabacum]                         |
| MGTNYSKPTTSINDASNLNRVPFE          | 12.1                    | gi 13021867 gb AAK11569.1 AF318493_1 | Pto-like protein kinase D [Lycopersicon hirsutum]                                             |
| MGCCQSRIDSKEIVSRCKARKRYLK         | 12.1                    | gi 15230441 ref NP_190697.1          | proline-rich protein family [Arabidopsis thaliana]                                            |
| MGTNYSKPTTSINDASNLSNRVPFE         | 12.1                    | gi 8547236 gb AAF76311.1 AF220603_3  | LescPth2 [Lycopersicon esculentum]                                                            |
| MGGCVSVSLSCDRVVNQFSQWLCVS         | 11.8                    | gi 22497333 gb AAL65635.1            | RFL1 [Arabidopsis thaliana]                                                                   |
| MGSLCSRKNHYSQADDEENTQTAEI         | 11.7                    | gi 3913725 sp P93564 GBA1_SOLTU      | Guanine nucleotide-binding protein alpha-1 subunit (GP-alpha-1)                               |

| Sequence (Supplementary positive) | HMM <sub>80</sub> score | ID                                  | Description                                                                           |
|-----------------------------------|-------------------------|-------------------------------------|---------------------------------------------------------------------------------------|
| MGCSHSKFDDDEAVQICKDRKRFIK         | 11.7                    | gi 15234640 ref NP_194742.1         | expressed protein [Arabidopsis thaliana]                                              |
| MGSCV GKERSDEEDKIDFKGGNVHV        | 11.5                    | gi 20804820 dbj BAB92503.1          | thioredoxin-like protein [Oryza sativa (japonica cultivar-group)]                     |
| MGTALGKPFAGFFHQEESRIVLFGFL        | 11.5                    | gi 15217757 ref NP_171745.1         | ADP-ribosylation factor, putative [Arabidopsis thaliana]                              |
| MGNCVGGHSDRKNALNPNEPAATNV         | 11.3                    | gi 5162878 dbj BAA81749.1           | calcium-dependent protein kinase [Marchantia polymorpha]                              |
| MGCCLSKKPSPSLPSSVKPSDPIKP         | 11.3                    | gi 15218781 ref NP_176748.1         | hypothetical protein [Arabidopsis thaliana]                                           |
| MGSKYSKATNSINDALNPSYLVPFEE        | 11.2                    | gi 32330888 gb AAP79929.1           | Pto-like serine/threonine kinase [Capsicum annum]                                     |
| MGARCSKFSFCLFSPHFKSASVLES         | 11.1                    | gi 15232406 ref NP_190971.1         | protein kinase family [Arabidopsis thaliana]                                          |
| MGLLCSKNRRYNDADTEENTQTAEI         | 11.1                    | gi 1346103 sp P49082 GBA1_LOTJA     | Guanine nucleotide-binding protein alpha-1 subunit (GP-alpha-1)                       |
| MGCVHGRPSTSSPAAANASRRRDHP         | 11.1                    | gi 23495876 dbj BAC20085.1          | putative CRK1 protein(cdc2-related kinase 1) [Oryza sativa (japonica cultivar-group)] |
| MGSKYSKATNSINDALNSSYLVPFEE        | 11.1                    | gi 32330884 gb AAP79927.1           | Pto-like serine/threonine kinase [Capsicum annum]                                     |
| MGACASRPKDLDRDLAPVPAAEES          | 11.0                    | gi 5360192 gb AAD42902.1 AF161330_1 | unknown [Solanum chacoense]                                                           |
| MGNTCVGPSISKIGLFQSVSAAMWR         | 10.9                    | gi 16215475 emb CAC83000.1          | calcium-dependent protein kinase 2 [Nicotiana benthamiana]                            |
| MGCAQSRVDNEEA VARCKERRNVIK        | 10.9                    | gi 15239473 ref NP_197941.1         | expressed protein [Arabidopsis thaliana]                                              |
| MGNCCVSSGTTDRENENVSDKNTTI         | 10.9                    | gi 18407049 ref NP_564773.1         | expressed protein [Arabidopsis thaliana]                                              |
| MGGCTSKPSSSVKPNPYAPKDAVLQ         | 10.9                    | gi 15230288 ref NP_188541.1         | calcium-dependent protein kinase, putative (CDPK) [Arabidopsis thaliana]              |
| MGCGVSRPETDEGRQEGSRLGSIGK         | 10.9                    | gi 11994158 dbj BAB01187.1          | gene_id:MQP17.4~unknown protein [Arabidopsis thaliana]                                |
| MGASCSSPFPSPPAESNAPSASA           | 10.9                    | gi 20146453 dbj BAB89233.1          | pectate lyase-like protein [Oryza sativa (japonica cultivar-group)]                   |
| MGASGSKLEKALGDQFPEGERYFGL         | 10.8                    | gi 21740732 emb CAD40853.1          | OSJNBa0086B14.25 [Oryza sativa (japonica cultivar-group)]                             |



| Sequence (Supplementary positive) | HMM <sub>80</sub> score | ID                            | Description                                                      |
|-----------------------------------|-------------------------|-------------------------------|------------------------------------------------------------------|
| MGNCFSQSTQTRGSKRNQKPDPLDE         | 10.8                    | gi 28866606 emb CAD70166.1    | putative calcium-dependent protein kinase [Spirodela punctata]   |
| MGCLLSKDKDSEQEHNNGGYRYAES         | 10.7                    | gi 13561063 emb CAA65500.1    | protein kinase [Medicago sativa]                                 |
| MGNCCVSSGTTDRENENISDKNTTI         | 10.6                    | gi 21554122 gb AAM63202.1     | unknown [Arabidopsis thaliana]                                   |
| MGQCCSKGVSGENGGSVVAIGDGNS         | 10.5                    | gi 19547871 gb AAL87457.1     | serine/threonine protein kinase pk23 [Lycopersicon esculentum]   |
| MGACLSSSSVIDAQKQKPSAYVIS          | 10.5                    | gi 13699079 dbj BAB41200.1    | TMV response-related gene product [Nicotiana tabacum]            |
| MGSKYSKATNSINDALSSSYLVPFE         | 10.5                    | gi 32330886 gb AAP79928.1     | Pto-like serine/threonine kinase [Capsicum annuum]               |
| MGGCVSTHKAIRPRRKGRRRSSKH          | 10.4                    | gi 18406090 ref NP_566845.1   | expressed protein [Arabidopsis thaliana]                         |
| MGLVCSRNRRYRDSPEENAQA AEI         | 10.4                    | gi 3913709 sp O04279 GBA2_PEA | Guanine nucleotide-binding protein alpha-2 subunit (GP-alpha-2)  |
| MGNKTSRKSKEKSGRNYTTELRSYE         | 10.4                    | gi 15235333 ref NP_195159.1   | conserved hypothetical common family [Arabidopsis thaliana]      |
| MGCCFSVIDDDGYEHDDAVSGSVNE         | 10.4                    | gi 32488315 emb CAE02892.1    | OSJNBa0015K02.9 [Oryza sativa (japonica cultivar-group)]         |
| MGCSSSVPARSTGGLNNISNDNSAT         | 10.3                    | gi 5931625 dbj BAA84717.1     | rab5B [Oryza sativa (japonica cultivar-group)]                   |
| MGLSFTKLLGRLFSEKEMRILMVGL         | 10.3                    | gi 29124979 gb AAO63779.1     | ADP-ribosylation factor 1 [Populus tremuloides]                  |
| MGSCFSSEGGNESRKESAERPQITP         | 10.3                    | gi 24796805 gb AAN64481.1     | putative protein kinase [Oryza sativa (japonica cultivar-group)] |
| MGCCISKCSKSKDFKEAEEPHEK           | 10.3                    | gi 15219009 ref NP_173570.1   | hypothetical protein [Arabidopsis thaliana]                      |
| MGCAASRIDNEEKVLVCRQRKRLMK         | 10.3                    | gi 30686165 ref NP_181014.2   | proline-rich protein family [Arabidopsis thaliana]               |
| MGCFHSKAAKEFRGHEDPVKLASET         | 10.2                    | gi 18414931 ref NP_567533.1   | calcineurin B-like protein 1 (CBL1) [Arabidopsis thaliana]       |
| MGCNCTKGTRPDNDNVDNSNSIVSN         | 10.1                    | gi 15217565 ref NP_172431.1   | protein kinase -related [Arabidopsis thaliana]                   |
| MGSKYSKATNSINDALSSGYLVPFE         | 10.1                    | gi 32330890 gb AAP79930.1     | Pto-like serine/threonine kinase [Capsicum annuum]               |
| MGCFHSTAAREFPDHENPVKLASET         | 10.1                    | gi 15238015 ref NP_199521.1   | calcineurin B-like protein 9 (CBL9) [Arabidopsis thaliana]       |

| Sequence (Supplementary positive) | HMM <sub>80</sub> score | ID                          | Description                                                                    |
|-----------------------------------|-------------------------|-----------------------------|--------------------------------------------------------------------------------|
| MGLLCSKHQHSTKPDAENAQATGIE         | 10.0                    | gi 7441569 pir T09152       | GTP-binding regulatory protein alpha chain - spinach                           |
| MGGCASKPKESDIPETEKTVVESKN         | 10.0                    | gi 18423589 ref NP_568803.1 | expressed protein [Arabidopsis thaliana]                                       |
| MGNCVARSHTAVDAGGDGGEDGKRR         | 10.0                    | gi 33146759 dbj BAC79670.1  | putative protein phosphatase 2C [Oryza sativa (japonica cultivar-group)]       |
| MGCVFGKESLAPEGRERGGREKEN          | 10.0                    | gi 7688002 emb CAB89665.1   | CRK1 protein [Beta vulgaris subsp. vulgaris]                                   |
| MGGCISVLSCLDRVNNQISQCLCVS         | 9.9                     | gi 22497401 gb AAL65637.1   | RFL1 [Arabidopsis lyrata]                                                      |
| MGGCVSSNLLTPTDDSSFSHLTSSS         | 9.9                     | gi 15223291 ref NP_174553.1 | expressed protein [Arabidopsis thaliana]                                       |
| MGNTCRGSFKGNIFQGYSPQPEESST        | 9.8                     | gi 20453015 gb AAL68972.1   | calmodulin-like-domain protein kinase CPK2 [Cucurbita maxima]                  |
| MGSSASKTASSVSSASSSSAFSPPP         | 9.8                     | gi 30694571 ref NP_567043.2 | expressed protein [Arabidopsis thaliana]                                       |
| MGGGNSKEESSSPSSSSWASHQSYP         | 9.7                     | gi 15232157 ref NP_186814.1 | copine-related [Arabidopsis thaliana]                                          |
| MGCGSSLPDRDSRPFGRDNPENGGG         | 9.7                     | gi 1370180 emb CAA98167.1   | RAB5B [Lotus corniculatus var. japonicus]                                      |
| MGCCFSAGKVTAPPVAAAQIPPPLE         | 9.7                     | gi 34146808 gb AAQ62412.1   | At4g28180 [Arabidopsis thaliana]                                               |
| MGGVCSCVFKDDDKKKKLRNDDDK          | 9.7                     | gi 18397646 ref NP_564362.1 | expressed protein [Arabidopsis thaliana]                                       |
| MGNAGSSPEQAAGNNKEDAEARRQP         | 9.6                     | gi 18844859 dbj BAB85328.1  | OJ1656_A11.17 [Oryza sativa (japonica cultivar-group)]                         |
| MGNCLSASTLPTEPNAPKSVEEGVK         | 9.6                     | gi 22327062 ref NP_197926.2 | protein kinase family [Arabidopsis thaliana]                                   |
| MGNNFVSESPSLAPFLCGKRKYLYN         | 9.6                     | gi 15238051 ref NP_199537.1 | disease resistance protein (CC-NBS-LRR class), putative [Arabidopsis thaliana] |
| MGTCFSSSTKSTAEISPFDLVVKPP         | 9.6                     | gi 18410034 ref NP_566997.1 | expressed protein [Arabidopsis thaliana]                                       |
| MGSCFSSRVKADIFHNGKSSDLYGL         | 9.5                     | gi 15225520 ref NP_181496.1 | protein kinase, putative [Arabidopsis thaliana]                                |
| MGCISSKNVSLTDQGDSPLPEPGL          | 9.4                     | gi 22327464 ref NP_198758.2 | cdc2-related protein [Arabidopsis thaliana]                                    |
| MGCCYLSSTVDPVQDHTDASSEP           | 9.4                     | gi 15227366 ref NP_179301.1 | protein kinase family [Arabidopsis thaliana]                                   |
| MGSCFSSSKVSGSNSNTPSTNNTAT         | 9.4                     | gi 3779218 gb AAC78558.1    | protein kinase CPK1 [Solanum tuberosum]                                        |

| Sequence (Supplementary positive) | HMM <sub>80</sub> score | ID                                   | Description                                                                             |
|-----------------------------------|-------------------------|--------------------------------------|-----------------------------------------------------------------------------------------|
| MGNCFGSEEAEEAAATVRAPAQGHG         | 9.3                     | gi 32488580 emb CAE03088.1           | OSJNBa0017B10.3 [ <i>Oryza sativa</i> (japonica cultivar-group)]                        |
| MGCFNSKHSSPAGPPRPVRRRLDTN         | 9.2                     | gi 22330784 ref NP_683519.1          | cdc2-related protein [ <i>Arabidopsis thaliana</i> ]                                    |
| MGLVCSRNRRYRDSDPGENAQAAEI         | 9.2                     | gi 22476942 gb AAM97352.1            | G protein alpha II subunit [ <i>Pisum sativum</i> ]                                     |
| MGLCHSKIDKTTRKETGATSTATT          | 9.2                     | gi 15219170 ref NP_173072.1          | protein phosphatase 2C -related [ <i>Arabidopsis thaliana</i> ]                         |
| MGCISSKSVSCLTDQGDSPLPEPGL         | 9.2                     | gi 18032144 gb AAL56635.1 AF120153_1 | cyclin-dependent kinase CDC2C [ <i>Arabidopsis thaliana</i> ]                           |
| MGLLCSRNRRYNDADAEENAQAEEI         | 9.0                     | gi 3334195 sp Q40224 GBA1_LUPLU      | Guanine nucleotide-binding protein alpha-1 subunit (GP-alpha-1)                         |
| MGAGVSGLFGLGGDEGETSAAVGGGA        | 9.0                     | gi 31433129 gb AAP54682.1            | unknown protein [ <i>Oryza sativa</i> (japonica cultivar-group)]                        |
| MGAASSRLEKALGEQFPEGERYFGL         | 9.0                     | gi 24756890 gb AAN64154.1            | Putative ubiquitin-specific protease 3 [ <i>Oryza sativa</i> (japonica cultivar-group)] |
| MGSAMSLGCSKRKATNQDVDSERK          | 8.9                     | gi 25453543 pir  T52347              | disease resistance protein RPP1-WsB [imported] - <i>Arabidopsis thaliana</i> (fragment) |
| MGLLCSRNRRYNDADAEENAQTAEI         | 8.9                     | gi 3913724 sp P93163 GBA2_SOYBN      | Guanine nucleotide-binding protein alpha-2 subunit (GP-alpha-2)                         |
| MGSGFSSLLPCFNQGHRNRRRHSSA         | 8.8                     | gi 15226962 ref NP_181078.1          | expressed protein [ <i>Arabidopsis thaliana</i> ]                                       |
| MGNCCSDVASGAGATAGVGGSGSSA         | 8.7                     | gi 34365733 gb AAQ65178.1            | At5g61900 [ <i>Arabidopsis thaliana</i> ]                                               |
| MGLLCSKSNRYNDAKAEENAQTAEI         | 8.7                     | gi 3913708 sp O04278 GBA1_PEA        | Guanine nucleotide-binding protein alpha-1 subunit (GP-alpha-1)                         |
| MGCICKGAAEDEEGVVYHREKANE          | 8.6                     | gi 15217643 ref NP_174637.1          | protein kinase -related [ <i>Arabidopsis thaliana</i> ]                                 |
| MGNAAAVPSSCASADAAPSTTPTIK         | 8.5                     | gi 13872953 dbj BAB44058.1           | P0030H07.22 [ <i>Oryza sativa</i> (japonica cultivar-group)]                            |
| MGLCYSVDRTTGKEPGEASSTATTA         | 8.4                     | gi 22330744 ref NP_178081.2          | protein phosphatase-2C -related [ <i>Arabidopsis thaliana</i> ]                         |
| MGGCVSTSSKSTCSSWSNGEKPVR          | 8.4                     | gi 22328287 ref NP_680572.1          | protein phosphatase 2C (PP2C) -related [ <i>Arabidopsis thaliana</i> ]                  |
| MGSVMSLSCSKRKATSQDVECSSES         | 8.4                     | gi 15219186 ref NP_173623.1          | Kelch repeat containing F-box protein family [ <i>Arabidopsis thaliana</i> ]            |

| Sequence (Supplementary positive) | HMM <sub>80</sub> score | ID                          | Description                                                                    |
|-----------------------------------|-------------------------|-----------------------------|--------------------------------------------------------------------------------|
| MGAAVAGEPRHNNANGGHREREGIK         | 8.4                     | gi 31430970 gb AAP52815.1   | hypothetical protein [Oryza sativa (japonica cultivar-group)]                  |
| MGQCYGKARGASSRADHDADPSGAG         | 8.3                     | gi 7446432 pir  T02033      | calcium/calmodulin-dependent protein kinase homolog - maize                    |
| MGNLRCISQEQDPNQKKPSSVVNG          | 8.3                     | gi 15222256 ref NP_177084.1 | hydrolase, alpha/beta fold family [Arabidopsis thaliana]                       |
| MGCVSSNLLNHDEDFSQIGGGSSAF         | 8.3                     | gi 15235179 ref NP_192801.1 | hypothetical protein [Arabidopsis thaliana]                                    |
| MGNACRGSFRAKTFQGSYPQNHSTS         | 8.2                     | gi 31616519 gb AAP55748.1   | calcium-dependent protein kinase 3 [Capsicum annuum]                           |
| MGACLTLSFSCDEVVNQISQGLCIN         | 8.2                     | gi 15221277 ref NP_172692.1 | disease resistance protein (CC-NBS-LRR class), putative [Arabidopsis thaliana] |
| MGGAFSTSKPKPAAGEEGGESAVVA         | 8.1                     | gi 34394553 dbj BAC83857.1  | putative thioredoxin [Oryza sativa (japonica cultivar-group)]                  |
| MGCVLGRPGSSGSVSGSRDEVSTRI         | 8.1                     | gi 15229881 ref NP_187156.1 | cyclin-dependent protein kinase -related [Arabidopsis thaliana]                |
| MGCCGSSLRVGSHAPEKPPRRARPP         | 8.1                     | gi 31433335 gb AAP54864.1   | protein kinase-like protein [Oryza sativa (japonica cultivar-group)]           |
| MGGALSIVFGSGEDATAAGTESSEP         | 8.0                     | gi 1388078 gb AAC49353.1    | thioredoxin h                                                                  |
| MGLCFSKKQQVRRRREEQQPPCHE          | 8.0                     | gi 32483146 emb CAE02138.1  | OSJNBa0074L08.6 [Oryza sativa (japonica cultivar-group)]                       |
| MGVCCSKGTGIIVEHGADDGNECGD         | 7.9                     | gi 30679372 ref NP_195790.3 | protein phosphatase 2C (PP2C), putative [Arabidopsis thaliana]                 |
| MGCLRSLVRRKQFDSSNGKAETHHH         | 7.8                     | gi 30693001 ref NP_198510.2 | cationic amino acid transporter -related protein [Arabidopsis thaliana]        |
| MGCICSKGVRTNDDYIETNHVSIGK         | 7.8                     | gi 15223647 ref NP_176083.1 | CRK1 protein -related [Arabidopsis thaliana]                                   |
| MGSCLSSSGGGRRSLHGSPHVP            | 7.8                     | gi 15239351 ref NP_198474.1 | protein phosphatase 2C (PP2C), putative [Arabidopsis thaliana]                 |
| MGISFSIPFDPCVNKVSQWLDKVS          | 7.7                     | gi 15221747 ref NP_176525.1 | disease resistance protein (CC-NBS-LRR class), putative [Arabidopsis thaliana] |
| MGGCCSSSRKSHLVGTPVYYYPES          | 7.7                     | gi 18411296 ref NP_567171.1 | zinc finger (C3HC4-type RING finger) protein family [Arabidopsis thaliana]     |
| MGNSFTCISHEQQRPKKSSGGGGN          | 7.7                     | gi 15222699 ref NP_173960.1 | hydrolase, alpha/beta fold family [Arabidopsis thaliana]                       |

| Sequence (Supplementary positive) | HMM <sub>80</sub> score | ID                                   | Description                                                                                |
|-----------------------------------|-------------------------|--------------------------------------|--------------------------------------------------------------------------------------------|
| MGSKYSKATNSISDASNSFESYRFP         | 7.6                     | gi 8547238 gb AAF76313.1             | Pto kinase [ <i>Lycopersicon esculentum</i> ]                                              |
| MGFCFCLSSGGSTDKSQIYEITDYG         | 7.6                     | gi 15233997 ref NP_195021.1          | protein phosphatase 2C (PP2C), putative [ <i>Arabidopsis thaliana</i> ]                    |
| MGSCLSAESRSPRPGSPCSPAFSVR         | 7.6                     | gi 15232961 ref NP_186924.1          | protein phosphatase 2C (PP2C) [ <i>Arabidopsis thaliana</i> ]                              |
| MGGALSTVFGSGEDAAAAGTESSEP         | 7.5                     | gi 21595244 gb AAM66084.1            | thioredoxin [ <i>Arabidopsis thaliana</i> ]                                                |
| MGISFSNNRRRDNNRRHLHHYPP           | 7.5                     | gi 18397483 ref NP_566274.1          | RING zinc finger protein -related [ <i>Arabidopsis thaliana</i> ]                          |
| MGCCLSKNPPQASSSSLIDGSCSVK         | 7.4                     | gi 30693012 ref NP_198517.2          | serine-rich protein -related [ <i>Arabidopsis thaliana</i> ]                               |
| MGLSHARSGKRCNDFKVGELSCRG          | 7.3                     | gi 13873011 dbj BAB44115.1           | B1085F09.11 [ <i>Oryza sativa</i> (japonica cultivar-group)]                               |
| MGNANAREDGAAVDGDGDGEVSGRR         | 7.3                     | gi 5702015 emb CAB52141.1            | GAL83 protein [ <i>Solanum tuberosum</i> ]                                                 |
| MGQCYGKVNQSKQNGEEEANTATYV         | 7.3                     | gi 18087555 gb AAL58909.1 AF462819_1 | At2g46700/T3A4.8 [ <i>Arabidopsis thaliana</i> ]                                           |
| MGCAGSTQSQADGSVKKIRKPKPWK         | 7.3                     | gi 18404455 ref NP_564630.1          | expressed protein [ <i>Arabidopsis thaliana</i> ]                                          |
| MGGCAGKVRRDDEEKLDKGGNVHI          | 7.3                     | gi 24637227 gb AAN63617.1 AF435816_1 | thioredoxin h-like protein [ <i>Zea mays</i> ]                                             |
| MGCCQSLFSGDNPLGKDGVPQPLS          | 7.3                     | gi 18418600 ref NP_567980.1          | protein kinase family [ <i>Arabidopsis thaliana</i> ]                                      |
| MGRSSSKKKKKRGGSGRRGQLKDHG         | 7.2                     | gi 30694992 ref NP_191500.2          | protein kinase like [ <i>Arabidopsis thaliana</i> ]                                        |
| MGNLCSLFTPPKPVKKRKPITKRQS         | 7.2                     | gi 15230077 ref NP_189622.1          | hydrolase, alpha/beta fold family [ <i>Arabidopsis thaliana</i> ]                          |
| MGNRTSRHHRAAPEQPPQPKPKPQ          | 7.2                     | gi 12313676 dbj BAB21081.1           | putative calcium-dependent protein kinase [ <i>Oryza sativa</i> (japonica cultivar-group)] |
| MGNCLSTSDPSHEDVSKKLPKALPV         | 7.2                     | gi 30689674 ref NP_850414.1          | expressed protein [ <i>Arabidopsis thaliana</i> ]                                          |
| MGQCYGKVNQSKQNGEEEANTTTYV         | 7.1                     | gi 15226426 ref NP_182193.1          | calcium-dependent protein kinase, putative (CDPK) [ <i>Arabidopsis thaliana</i> ]          |
| MGNCCGTAGSLAQNDNKPKKGRKKQ         | 7.0                     | gi 30694663 ref NP_191312.2          | calcium-dependent protein kinase, putative (CDPK) [ <i>Arabidopsis thaliana</i> ]          |
| MGCAQSNEDGEGPVARCRERKHLLR         | 6.9                     | gi 23237834 dbj BAC16409.1           | putative bZIP protein [ <i>Oryza sativa</i> (japonica cultivar-group)]                     |
| MGLCHGKPIEQSKNLPISNEIET           | 6.9                     | gi 15229002 ref NP_191235.1          | calcium-dependent protein kinase, putative (CDPK) [ <i>Arabidopsis thaliana</i> ]          |

| Sequence (Supplementary positive) | HMM <sub>80</sub> score | ID                                  | Description                                                                        |
|-----------------------------------|-------------------------|-------------------------------------|------------------------------------------------------------------------------------|
| MGCAGSTPKTDDNSKKLKKPKPWKH         | 6.9                     | gi 15289832 dbj BAB63530.1          | P0435H01.26 [Oryza sativa (japonica cultivar-group)]                               |
| MGASGSKPEGAGPGPALPTPSPAPP         | 6.8                     | gi 9022433 gb AAF82382.1 AF280543_1 | putative copper chaperone Cox17 [Chlamydomonas reinhardtii]                        |
| MGACASRPKDLKDLAPAPVPAEDA          | 6.8                     | gi 6019472 gb AAD02545.2            | PGPS/D3 [Petunia x hybrida]                                                        |
| MGNVYVSSALSKTSSSSSSAAKVILP        | 6.8                     | gi 15237951 ref NP_197237.1         | expressed protein [Arabidopsis thaliana]                                           |
| MGTSVSKPVSDDKKKGTSVSKPVKN         | 6.5                     | gi 15217704 ref NP_174650.1         | AIG1-related protein [Arabidopsis thaliana]                                        |
| MGCGGSKEAVATGNTVVGSTGGRSSR        | 6.5                     | gi 20160760 dbj BAB89701.1          | P0504E02.1 [Oryza sativa (japonica cultivar-group)]                                |
| MGGKSSKSKKNVEFGSPSTPVQIKI         | 6.5                     | gi 15224198 ref NP_179453.1         | At14a, putative [Arabidopsis thaliana]                                             |
| MGNNCVGPSAAGQNGFFANVALWRP         | 6.4                     | gi 27819504 gb AAO24908.1           | putative calcium-dependent protein kinase [Oryza sativa (japonica cultivar-group)] |
| MGNCCGWGARIKDGSPQPGASGMFS         | 6.4                     | gi 27545044 gb AAO18450.1           | putative protein kinase [Oryza sativa (japonica cultivar-group)]                   |
| MGLLCSRNKGYNQADDEENTQTADI         | 6.3                     | gi 18369796 dbj BAB84093.1          | heterotrimeric GTP binding protein alpha subunit [Nicotiana tabacum]               |
| MGCTSSKLDDLPAVALCRERCAFLE         | 6.3                     | gi 15236929 ref NP_195250.1         | expressed protein [Arabidopsis thaliana]                                           |
| MGSLCCVAAKSDRSNSTSGDFSFGL         | 6.3                     | gi 26451018 dbj BAC42615.1          | putative mandelonitrile lyase [Arabidopsis thaliana]                               |
| MGNANGREDGAIPDAGDPSGREPHA         | 6.3                     | gi 32364486 gb AAO61676.1           | AKIN beta1 [Medicago truncatula]                                                   |
| MGVASCLWGGSESRGNQNGSAAVT          | 6.3                     | gi 29893573 gb AAP06827.1           | putative receptor ser/thr protein [Oryza sativa (japonica cultivar-group)]         |
| MGSCISLQISCDQVLTRAYSCFFSL         | 6.3                     | gi 15236915 ref NP_192816.1         | disease resistance protein (CC-NBS-LRR class), putative [Arabidopsis thaliana]     |
| MGLSYSSNPTPLDNDQKKPSPATAV         | 6.3                     | gi 8885571 dbj BAA97501.1           | Dof6 zinc finger protein-like [Arabidopsis thaliana]                               |
| MGANISGGSPEFDRNDDVYSRKLRL         | 6.2                     | gi 30695337 ref NP_567108.2         | F-box protein (lectin-related) [Arabidopsis thaliana]                              |
| MGNKDSKSSSSTNPKEEIAAVPQP          | 6.2                     | gi 15239322 ref NP_196220.1         | hypothetical protein [Arabidopsis thaliana]                                        |
| MGNTRGFSFKGNIFQGYSPEDSST          | 6.2                     | gi 20453013 gb AAL68971.1           | phloem calmodulin-like-domain protein kinase PCPK1 [Cucurbita maxima]              |

| Sequence (Supplementary positive) | HMM <sub>80</sub> score | ID                                    | Description                                                                                                |
|-----------------------------------|-------------------------|---------------------------------------|------------------------------------------------------------------------------------------------------------|
| MGSSFRSSSRNEHEDGGDEAEHAL          | 6.2                     | gi 15228112 ref NP_181265.1           | ABC transporter family protein [Arabidopsis thaliana]                                                      |
| MGSFC SKSLGINFGSEYSGSSVADD        | 6.2                     | gi 30682523 ref NP_680154.2           | expressed protein [Arabidopsis thaliana]                                                                   |
| MGCASSKHRKRLHCRRGYSPVDV           | 6.1                     | gi 15228503 ref NP_189527.1           | expressed protein [Arabidopsis thaliana]                                                                   |
| MGICHGKPV EQQSKSLPVSETNEA         | 6.1                     | gi 15226841 ref NP_181647.1           | calcium-dependent protein kinase, putative (CDPK) [Arabidopsis thaliana]                                   |
| MGSSVSKTASSASASSITSILNSPP         | 6.1                     | gi 15227326 ref NP_181664.1           | expressed protein [Arabidopsis thaliana]                                                                   |
| MGCFLSKPAGAGPLPPNDAAALPAD         | 6.1                     | gi 31433613 gb AAP55105.1             | putative protein kinase [Oryza sativa (japonica cultivar-group)]                                           |
| MGCGLSREKDAGGGPRRRPGSVGDV         | 6.0                     | gi 32487665 emb CAE05655.1            | OSJNBa0038O10.21 [Oryza sativa (japonica cultivar-group)]                                                  |
| MGMAAGRSKPM AASSSERGRRWSAR        | 6.0                     | gi 18087678 gb AAL58970.1 AC091811_19 | hypothetical protein [Oryza sativa]                                                                        |
| MGCTSSKQAKANVVADV KPPPSF          | 6.0                     | gi 15217659 ref NP_176631.1           | peptide transporter -related [Arabidopsis thaliana]                                                        |
| MGLCHGKPSQIPEPEAE EAAAAAGV        | 6.0                     | gi 23237898 dbj BAC16472.1            | putative calcium/calmodulin-dependent protein kinase CaMK [Oryza sativa (japonica cultivar-group)]         |
| MGLSYSSNPTQLDNDQKKPSPATAA         | 6.0                     | gi 21554185 gb AAM63264.1             | zinc finger protein-like [Arabidopsis thaliana]                                                            |
| MGGLCSKGS AVDKSPD T T L G P D R V | 6.0                     | gi 20146508 dbj BAB89287.1            | P0491F11.23 [Oryza sativa (japonica cultivar-group)]                                                       |
| MGVSFSCPFAEQDDVEAALDSVTVK         | 6.0                     | gi 15231294 ref NP_187969.1           | hypothetical protein [Arabidopsis thaliana]                                                                |
| MGSSFSASFTNSTTAAAVPPPSPPS         | 6.0                     | gi 15221835 ref NP_173303.1           | expressed protein [Arabidopsis thaliana]                                                                   |
| MGAGTSKNSDSTSHGDGDGEERDEY         | 5.9                     | gi 7484665 pir T08994                 | 6-phosphofructo-2-kinase (EC 2.7.1.105) / fructose-2, 6-bisphosphate 2-phosphatase (EC 3.1.3.46) - spinach |
| MGNSVRSNLRDIRRRSMDPRMWHK          | 5.9                     | gi 18395895 ref NP_565317.1           | expressed protein [Arabidopsis thaliana]                                                                   |
| MGNCVALEISCDQTLNHACGCLFGD         | 5.9                     | gi 15218365 ref NP_173041.1           | disease resistance protein (CC-NBS-LRR class), putative [Arabidopsis thaliana]                             |

| Sequence (Supplementary positive) | HMM <sub>80</sub> score | ID                                    | Description                                                                                   |
|-----------------------------------|-------------------------|---------------------------------------|-----------------------------------------------------------------------------------------------|
| MGNCFGFSAKVGNRRESPYRGSSRIS        | 5.8                     | gi 25287598 pir  G86396               | protein T7N9.2 [imported] - Arabidopsis thaliana                                              |
| MGNRARRRPPGGSGDEENEQRKVGGG        | 5.8                     | gi 34393262 dbj BAC83132.1            | hypothetical protein [Oryza sativa (japonica cultivar-group)]                                 |
| MGCEVSKLSALCCVSESGRSNPDVT         | 5.8                     | gi 15237604 ref NP_198942.1           | protein kinase family [Arabidopsis thaliana]                                                  |
| MGNCCPGSGDAEPASSDASTGNGSS         | 5.8                     | gi 20160680 dbj BAB89623.1            | putative calcium-dependent protein kinase [Oryza sativa (japonica cultivar-group)]            |
| MGSACSRKRGQLLVDEEDLYSARFS         | 5.8                     | gi 32488227 emb CAE02935.1            | OSJNBa0014K14.7 [Oryza sativa (japonica cultivar-group)]                                      |
| MGCISSKLLPPPGDARGGSGARAT          | 5.8                     | gi 21741722 emb CAD40645.1            | OSJNBa0073L04.18 [Oryza sativa (japonica cultivar-group)]                                     |
| MGNCCRSPAAAAREDEVKSSHFPASA        | 5.8                     | gi 20805246 dbj BAB92912.1            | putative calcium-dependent protein kinase [Oryza sativa (japonica cultivar-group)]            |
| MGCWYSRIDREEIVSRCKARKRYMK         | 5.8                     | gi 22858664 gb AAN05792.1             | unknown [Gossypium hirsutum]                                                                  |
| MGNQVASFSGCCAGTTAGEISGRYV         | 5.7                     | gi 15232663 ref NP_187551.1           | hypothetical protein [Arabidopsis thaliana]                                                   |
| MGGCVGKGRSIVEEKLDKGGNVHV          | 5.7                     | gi 27543511 gb AAO16555.1             | thioredoxin h [Leymus chinensis]                                                              |
| MGNQTSKKSQETSAKSVHYTTELRS         | 5.7                     | gi 15235330 ref NP_195158.1           | hypothetical protein common family [Arabidopsis thaliana]                                     |
| MGHSPSRHNACGGGGDGESPPSPL          | 5.7                     | gi 20146228 dbj BAB89010.1            | putative phosphatidylserine decarboxylase [Oryza sativa (japonica cultivar-group)]            |
| MGCKGSKLEDQEAVALCRGRAELLA         | 5.6                     | gi 32483081 emb CAE01923.1            | OSJNBb0078D11.6 [Oryza sativa (japonica cultivar-group)]                                      |
| MGCFLACFGDRRRRRQPRRQSPARS         | 5.6                     | gi 32488453 emb CAE03386.1            | OSJNBa0004N05.10 [Oryza sativa (japonica cultivar-group)]                                     |
| MGSAMSLSCSKRKATSQDVSECK           | 5.6                     | gi 30692215 ref NP_850655.1           | disease resistance protein RPP1-WsB-like (TIR-NBS-LRR class), putative [Arabidopsis thaliana] |
| MGVNASEPKRTRSRPSQSQRHPST          | 5.5                     | gi 11357615 pir  T47772               | hypothetical protein F24I3.200 - Arabidopsis thaliana                                         |
| MGITSSTDPKTETFSDPKSQNNEEG         | 5.5                     | gi 21592562 gb AAM64511.1             | unknown [Arabidopsis thaliana]                                                                |
| MGNRLCCHDAADDEKPAAAASVSGGG        | 5.5                     | gi 20503002 gb AAM22711.1 AC098693_16 | Putative protein kinase [Oryza sativa (japonica cultivar-group)]                              |



| Sequence (Supplementary positive) | HMM <sub>80</sub> score | ID                                   | Description                                                                |
|-----------------------------------|-------------------------|--------------------------------------|----------------------------------------------------------------------------|
| MGSVCCVAVKDRKVPPSGGPASSSV         | 5.4                     | gi 15222225 ref NP_177673.1          | expressed protein [Arabidopsis thaliana]                                   |
| MGCLSVVGASPCVSSALSSPTSRL          | 5.4                     | gi 27807824 dbj BAC55280.1           | nucleoside diphosphate kinase [Nicotiana tabacum]                          |
| MGASSTDDKESSEKREIESLAAST          | 5.4                     | gi 15241814 ref NP_198775.1          | expressed protein [Arabidopsis thaliana]                                   |
| MGCASSAPDRTVSRGSSSLNSANEG         | 5.4                     | gi 7438400 pir T12437                | small GTP-binding protein - common ice plant                               |
| MGCFQSKSRRPFGHEDPVLLASQT          | 5.4                     | gi 27650414 emb CAD33259.1           | calcineurin B [Crocus sativus]                                             |
| MGSCVSTTRRRRRSRKLSVAARKFR         | 5.4                     | gi 14488359 gb AAK63926.1 AC084282_7 | hypothetical protein [Oryza sativa (japonica cultivar-group)]              |
| MGISLSKRRRDNNNNHHHPHNPP           | 5.3                     | gi 15239642 ref NP_197409.1          | expressed protein [Arabidopsis thaliana]                                   |
| MGNIGIGKLSKCLTGGAGRNNKKPELS       | 5.2                     | gi 15226985 ref NP_180455.1          | expressed protein [Arabidopsis thaliana]                                   |
| MGSCVSSSQSKSSASDSVVKLASF          | 5.2                     | gi 30678442 ref NP_186835.2          | expressed protein [Arabidopsis thaliana]                                   |
| MGTCMSTHSRRLRPRRKGRRRFSKN         | 5.2                     | gi 15241746 ref NP_198759.1          | hypothetical protein [Arabidopsis thaliana]                                |
| MGGCAAQAARADAAATGQSAARERA         | 5.1                     | gi 31126743 gb AAP44664.1            | hypothetical protein [Oryza sativa (japonica cultivar-group)]              |
| MGLTSSKGGRCRQVGPTGQRLKGGRR        | 5.1                     | gi 34395360 dbj BAC84430.1           | hypothetical protein [Oryza sativa (japonica cultivar-group)]              |
| MGLCWGSPSDSPPTTTTSSSTGNISS        | 5.0                     | gi 18398350 ref NP_565408.1          | protein kinase -related [Arabidopsis thaliana]                             |
| MGSSSSPKPDNVQEA EKNEFASLS         | 5.0                     | gi 21593253 gb AAM65202.1            | transcriptional regulator, putative [Arabidopsis thaliana]                 |
| MGNLHGIHRSHHGGSNFPGEAPNSP         | 5.0                     | gi 15232712 ref NP_187565.1          | polysaccharide lyase family 1 (pectate lyase) [Arabidopsis thaliana]       |
| MGGCTSKQERRGVRSVKETSKDQSR         | 5.0                     | gi 15229545 ref NP_189035.1          | expressed protein [Arabidopsis thaliana]                                   |
| MGCLHSKTANLPSSDDPSAPNKPES         | 5.0                     | gi 15237465 ref NP_199469.1          | protein kinase family [Arabidopsis thaliana]                               |
| MGCCCLPSIPESSRTIDEHLPLSR          | 4.9                     | gi 18416148 ref NP_567682.1          | zinc finger (C3HC4-type RING finger) protein family [Arabidopsis thaliana] |
| MGAGMSSGRRPSFYGGGGGGVGRP          | 4.9                     | gi 15408827 dbj BAB64219.1           | P0581F09.16 [Oryza sativa (japonica cultivar-group)]                       |

| Sequence (Supplementary positive) | HMM <sub>80</sub> score | ID                          | Description                                                                     |
|-----------------------------------|-------------------------|-----------------------------|---------------------------------------------------------------------------------|
| MGSCASVHKDLGFPKKLFLASSPTK         | 4.9                     | gi 19386733 dbj BAB86115.1  | P0678F11.22 [Oryza sativa (japonica cultivar-group)]                            |
| MGCLLGCFGRRKNRRRQRRRESFQP         | 4.9                     | gi 15240079 ref NP_199217.1 | expressed protein [Arabidopsis thaliana]                                        |
| MGHSARKKKKKKGGGRKAADHGG           | 4.9                     | gi 32480225 emb CAE02048.1  | OJ990528_30.6 [Oryza sativa (japonica cultivar-group)]                          |
| MGNAILLRKCLNSHGVSASSGGVS          | 4.8                     | gi 18410440 ref NP_567036.1 |                                                                                 |
| MGCVASKNAVSVTPAADSSGALRER         | 4.8                     | gi 33146814 dbj BAC79804.1  | putative cyclin-dependent kinase CDC2C [Oryza sativa (japonica cultivar-group)] |
| MGITSSTDPKTETFSDPKSQNNEEA         | 4.8                     | gi 30683589 ref NP_849659.1 | expressed protein [Arabidopsis thaliana]                                        |
| MGCASSKNRNRRCRNCKGGLSPVIVP        | 4.7                     | gi 22327469 ref NP_680368.1 | expressed protein [Arabidopsis thaliana]                                        |
| MGNCSPPRRRGRPTSPSGSPPLDR          | 4.7                     | gi 20521256 dbj BAB91772.1  | P0679C12.24 [Oryza sativa (japonica cultivar-group)]                            |
| MGSSQSSQLLDEEEEEDEAESEGE          | 4.7                     | gi 18391446 ref NP_563918.1 | expressed protein [Arabidopsis thaliana]                                        |
| MGGCVGKDRSIVEDKLDKFGGNVHV         | 4.7                     | gi 11362710 pir T50864      | thioredoxin-like protein [imported] - Hordeum bulbosum                          |
| MGNNSREAKESRRSRLRHKLQKFR          | 4.7                     | gi 15242057 ref NP_200529.1 | phosphatidylserine decarboxylase, putative [Arabidopsis thaliana]               |
| MGHTSSGNEVPLKYSSGKAFPLGVS         | 4.6                     | gi 29126649 gb AAO17049.2   | isoamylase-type starch debranching enzyme ISO3 [Zea mays]                       |
| MGGLCSRSSSVNAPGGTFAHVNGH          | 4.6                     | gi 15218580 ref NP_174692.1 | expressed protein [Arabidopsis thaliana]                                        |
| MGACNSCEATAVAAVNGRSASGEAT         | 4.6                     | gi 31126784 gb AAP44703.1   | hypothetical protein [Oryza sativa (japonica cultivar-group)]                   |
| MGCVSSCFGVDDFEDYPNPSSSVNR         | 4.6                     | gi 15242393 ref NP_197083.1 | zinc finger (C3HC4-type RING finger) protein family [Arabidopsis thaliana]      |
| MGACISFFSSSSPSKTAATTNNHSN         | 4.5                     | gi 25287611 pir C85420      | protein kinase-like protein [imported] - Arabidopsis thaliana                   |
| MGCSFSGLNALYDAVNGGGDVWINE         | 4.4                     | gi 30682270 ref NP_850792.1 | serine/threonine protein kinase, putative [Arabidopsis thaliana]                |
| MGCFMGCFLSSNKKRRNSIRKILP          | 4.4                     | gi 30685680 ref NP_180898.2 | expressed protein [Arabidopsis thaliana]                                        |
| MGPGASKETPTQQQKPAESVSTPPE         | 4.4                     | gi 20161674 dbj BAB90592.1  | P0697D09.21 [Oryza sativa (japonica                                             |

| Sequence (Supplementary positive) | HMM <sub>80</sub> score | ID                                   | Description                                                                       |
|-----------------------------------|-------------------------|--------------------------------------|-----------------------------------------------------------------------------------|
|                                   |                         |                                      | cultivar-group)]                                                                  |
| MGICFSAEDQHYQFSQQQNYPKKTT         | 4.4                     | gi 22325532 ref NP_178731.2          | protein kinase, putative [Arabidopsis thaliana]                                   |
| MGGCLSGDVKGGKQAIGGVQQRPTS         | 4.4                     | gi 15223946 ref NP_172362.1          | copine, putative [Arabidopsis thaliana]                                           |
| MGISSSSGSFRFSDNDHALGNSIEI         | 4.4                     | gi 25411036 pir  E84452              | hypothetical protein At2g03810 [imported] - Arabidopsis thaliana                  |
| MGLTSSLRFHRQNNKTFLGIFMILV         | 4.4                     | gi 15227374 ref NP_181682.1          | cytokinin oxidase family [Arabidopsis thaliana]                                   |
| MGSNASVKDILGELQKGSYISLLSK         | 4.4                     | gi 10998336 gb AAG25896.1 AF170086_1 | silverleaf whitefly-induced protein 1; M20B peptidase [Cucurbita pepo]            |
| MGAGASKDVDGGSLSQEREVSDGG          | 4.3                     | gi 14149116 dbj BAB55655.1           | fructose-6-phosphate 2-kinase/fructose-2,6-bisphosphatase [Bruguiera gymnorrhiza] |
| MGCFSCCGADDVGKKKKRDDPYVPI         | 4.3                     | gi 29027802 dbj BAC65877.1           | OSJNBa0011P19.1 [Oryza sativa (japonica cultivar-group)]                          |
| MGGCVGKGRRHIEEDKLDKGGNVH          | 4.3                     | gi 24637229 gb AAN63618.1 AF435817_1 | thioredoxin h-like protein [Oryza sativa]                                         |
| MGCGGSKVDDQPLVILCRERKQLIK         | 4.2                     | gi 15219083 ref NP_173593.1          | bzip-related transcription factor [Arabidopsis thaliana]                          |
| MGGRGGGSTDYDDKVGRRKKEKER          | 4.2                     | gi 15222574 ref NP_174492.1          | expressed protein [Arabidopsis thaliana]                                          |
| MGGSSGGVSYRSGGRSDVELEDYE          | 4.2                     | gi 25295800 pir  T52046              | potassium channel protein SKOR [validated] - Arabidopsis thaliana                 |
| MGCFGCCGGGEDFRRVSETGPKPVH         | 4.1                     | gi 22331138 ref NP_188367.2          | serine/threonine protein kinase, putative [Arabidopsis thaliana]                  |
| MGNACCVATRDKMVVPNTSAVENFQ         | 4.1                     | gi 30681426 ref NP_850014.1          | expressed protein [Arabidopsis thaliana]                                          |
| MGSSTSGNCSSVSTTGLANSSES           | 4.1                     | gi 15222223 ref NP_177672.1          | bZIP transcription factor ATB2, putative [Arabidopsis thaliana]                   |
| MGICLSAQIKAVSPGASPKYMSSEA         | 4.1                     | gi 15227001 ref NP_180459.1          | protein kinase (APK1b) [Arabidopsis thaliana]                                     |
| MGCVFGRPSSPPAAAARKGRRKKR          | 4.1                     | gi 15528679 dbj BAB64745.1           | putative CRK1 protein [Oryza sativa (japonica cultivar-group)]                    |
| MGTAVAAACAASGDSGDSGPRGDRS         | 4.0                     | gi 31415905 gb AAP50926.1            | hypothetical protein [Oryza sativa (japonica cultivar-group)]                     |

| Sequence (Supplementary positive) | HMM <sub>80</sub> score | ID                                   | Description                                                               |
|-----------------------------------|-------------------------|--------------------------------------|---------------------------------------------------------------------------|
| MGHCFSLPSSQSE-IHEDNEHGDGN         | 4.0                     | gi 15239565 ref NP_197973.1          | protein phosphatase 2C (PP2C), putative [Arabidopsis thaliana]            |
| MGGSSGGGVSYRSGGESDVELEDYE         | 4.0                     | gi 15232991 ref NP_186934.1          |                                                                           |
| MGTASSKSNINLSQVLNTEEPYSSV         | 3.9                     | gi 15235775 ref NP_194002.1          | cytochrome P450 family [Arabidopsis thaliana]                             |
| MGCSTSKLDDLPAVALCRDRCSFLE         | 3.9                     | gi 6598363 gb AAF18601.1 AC002354_13 | hypothetical protein [Arabidopsis thaliana]                               |
| MGSFHRRTFSYDKLPNEPIRLSVLK         | 3.9                     | gi 15239396 ref NP_197916.1          | expressed protein [Arabidopsis thaliana]                                  |
| MGNLGVREAGRMAVLSRRWRRLPGL         | 3.8                     | gi 34393595 dbj BAC83248.1           | unknown protein [Oryza sativa (japonica cultivar-group)]                  |
| MGNACCVAARDKMVVPNSSAGENLQ         | 3.8                     | gi 30692196 ref NP_849522.1          | expressed protein [Arabidopsis thaliana]                                  |
| MGPVFSSLMYEEEDQGNDSELGDIH         | 3.7                     | gi 32488631 emb CAE03424.1           | OSJNBa0032F06.7 [Oryza sativa (japonica cultivar-group)]                  |
| MGGVLLSSVLGGGGGDEPLAGNESES        | 3.7                     | gi 25990392 gb AAN76509.1 AF352030_1 | thioredoxin h [Brassica rapa]                                             |
| MGSGCASSPPTSPQPRHGRLVTVLS         | 3.6                     | gi 14346205 emb CAC41149.1           | unnamed protein product [Triticum aestivum]                               |
| MGNCCGTDGFKHERPLPAHPNRQGE         | 3.6                     | gi 23268465 gb AAN11310.1            | calmodulin domain protein kinase 1 [Ceratopteris richardii]               |
| MGLFTVTKKATTPFDGQKPGTSGLR         | 3.5                     | gi 12585309 sp P93804 PGM1_MAIZE     | Phosphoglucomutase, cytoplasmic 1 (Glucose phosphomutase 1) (PGM 1)       |
| MGACASASRPPSPRHGCSPTPT            | 3.5                     | gi 29467524 dbj BAC66713.1           | P0582D05.14 [Oryza sativa (japonica cultivar-group)]                      |
| MGRSRGVLSSGDDDTGHRSKRRRVS         | 3.5                     | gi 21898562 gb AAM77037.1            | histone acetyltransferase complex component [Zea mays]                    |
| MGCMFSLAAKFAFFPPSPPTYHLT          | 3.5                     | gi 15222598 ref NP_174498.1          | expressed protein [Arabidopsis thaliana]                                  |
| MGGFLVLNSSNNVVRTVPSKRRKHP         | 3.5                     | gi 15241355 ref NP_197544.1          | hypothetical protein [Arabidopsis thaliana]                               |
| MGNTQGKGDGAMTGRAKAITGGAVK         | 3.4                     | gi 11230987 dbj BAB18105.1           | cyclic nucleotide dependent protein kinase II [Chlamydomonas reinhardtii] |
| MGCCQSSFLKPSSLHDKKITSDDL          | 3.4                     | gi 15223700 ref NP_175512.1          | protein kinase - related [Arabidopsis thaliana]                           |
| MGGCVGKDRGIVEDKLDKFGGNVHV         | 3.3                     | gi 11362711 pir T50862               | thioredoxin-like protein [imported] - Phalaris coerulescens               |

| Sequence (Supplementary positive) | HMM <sub>80</sub> score | ID                          | Description                                                               |
|-----------------------------------|-------------------------|-----------------------------|---------------------------------------------------------------------------|
| MGLRLAGGEVAVGSSGRGGGGRWHG         | 3.3                     | gi 31415932 gb AAP50953.1   | hypothetical protein [Oryza sativa (japonica cultivar-group)]             |
| MGAAVALHFATSCALNHYTINPRVV         | 3.3                     | gi 15219001 ref NP_175655.1 | hypothetical protein [Arabidopsis thaliana]                               |
| MGIFTVRSAYKLASKAELCSENSGE         | 3.2                     | gi 28376719 gb AAO41149.1   | hypothetical protein [Oryza sativa (japonica cultivar-group)]             |
| MGGRCVGAAVKCGEGAAGGAEEGVG         | 3.2                     | gi 31431866 gb AAP53578.1   | hypothetical protein [Oryza sativa (japonica cultivar-group)]             |
| MGPKVAGPCPADGNGKSSSSPLLSA         | 3.2                     | gi 21952827 dbj BAC06243.1  | P0018C10.45 [Oryza sativa (japonica cultivar-group)]                      |
| MGLSARHGSLGGFYPGFIRRGSCGA         | 3.2                     | gi 18844884 dbj BAB85353.1  | P0519D04.12 [Oryza sativa (japonica cultivar-group)]                      |
| MGNNGGGNKKGRRDSSPPLETPPR          | 3.2                     | gi 31432873 gb AAP54449.1   | putative lanthionine synthetase [Oryza sativa (japonica cultivar-group)]  |
| MGHKQSVDSRGKGRKVPGSSSMVQK         | 3.2                     | gi 15226911 ref NP_178332.1 | F-box protein (SKP1 interacting partner 3-related) [Arabidopsis thaliana] |
| MGNNGNSTETKESRRSKMRKKIQNFR        | 3.1                     | gi 18416656 ref NP_567736.1 | phosphatidylserine decarboxylase, putative [Arabidopsis thaliana]         |
| MGATCVHGFDPDHLQDLRAKIFAL          | 3.1                     | gi 25406936 pir  E86202     | hypothetical protein [imported] - Arabidopsis thaliana                    |
| MGNSFGCSASGERLVSAARDGDFVE         | 3.1                     | gi 15240746 ref NP_196344.1 | expressed protein [Arabidopsis thaliana]                                  |
| MGGRGAGGEAHDDPFRSRSSSFVAV         | 3.1                     | gi 15128233 dbj BAB62561.1  | OSJNBa0089K24.19 [Oryza sativa (japonica cultivar-group)]                 |
| MGGKLCVAARSAHPSGRSAAVWPV          | 3.1                     | gi 11875149 dbj BAB19362.1  | hypothetical protein [Oryza sativa (japonica cultivar-group)]             |
| MGSSCSRSHSLSEAETTKNAKSADI         | 3.1                     | gi 540533 dbj BAA07405.1    | G protein alpha subunit [Oryza sativa (japonica cultivar-group)]          |
| MGGFAASNIVSESGEKASNLVYRGR         | 3.0                     | gi 34394682 dbj BAC83988.1  | hypothetical protein [Oryza sativa (japonica cultivar-group)]             |
| MGNVCVGNRSTSRNKGHRVSR             | 3.0                     | gi 31415931 gb AAP50952.1   | hypothetical protein [Oryza sativa (japonica cultivar-group)]             |
| MGGAVARAPGNQKQKSDLAGSQRR          | 3.0                     | gi 22535687 dbj BAC10861.1  | hypothetical protein [Oryza sativa (japonica cultivar-group)]             |
| MGSSRSEGSSSSARQPYGSPYR            | 2.9                     | gi 31432406 gb AAP54043.1   | hypothetical protein [Oryza sativa (japonica cultivar-group)]             |

| Sequence (Supplementary positive) | HMM <sub>80</sub> score | ID                                    | Description                                                                               |
|-----------------------------------|-------------------------|---------------------------------------|-------------------------------------------------------------------------------------------|
| MGGVTSSTSSSPATAAGGSSYSAE          | 2.9                     | gi 20160988 dbj BAB89922.1            | putative hypersensitive-induced response protein [Oryza sativa (japonica cultivar-group)] |
| MG-CFSCFDSSDDEKLNVPDES NHG        | 2.9                     | gi 15240038 ref NP_196820.1           | protein kinase family [Arabidopsis thaliana]                                              |
| MGLCVSVNRNEYVSSSTTAKIVTIN         | 2.8                     | gi 18411155 ref NP_565136.1           | expressed protein [Arabidopsis thaliana]                                                  |
| MGCFGRTPKSNKRS DTKTKNNDFT         | 2.8                     | gi 15226901 ref NP_180426.1           | protein kinase family [Arabidopsis thaliana]                                              |
| MGNAIGKASNDIGGFIGNIFTAPLK         | 2.8                     | gi 25373345 pir A96819                | hypothetical protein F9K20.1 [imported] - Arabidopsis thaliana                            |
| MGASTSTSNPSLEAQEQETLASASL         | 2.8                     | gi 32489048 emb CAE04845.1            | OSJNBa0084K01.17 [Oryza sativa (japonica cultivar-group)]                                 |
| MGCTNSTEARREMLADAGR RATRS         | 2.7                     | gi 32490043 emb CAE05962.1            | OSJNBa0063C18.3 [Oryza sativa (japonica cultivar-group)]                                  |
| MGLFTVTKKATTPFEGQKPGTSGLR         | 2.7                     | gi 12585310 sp P93805 PGM2_MAIZE      | Phosphoglucomutase, cytoplasmic 2 (Glucose phosphomutase 2) (PGM 2)                       |
| MGNCWGAKISSESPCRSASSPSGGT         | 2.7                     | gi 14719339 gb AAK73157.1 AC079022_30 | putative protein kinase [Oryza sativa]                                                    |
| MGNCICVTEKTTTSWSGDDNGSYNK         | 2.7                     | gi 15234649 ref NP_193923.1           | hypothetical protein [Arabidopsis thaliana]                                               |
| MGQCYGKAGGASSRRADHDDAVAPP         | 2.7                     | gi 7446431 pir T03023                 | calcium-dependent protein kinase-related protein kinase - maize                           |
| MGEAASTEEDADAIKEDEAASTEE          | 2.7                     | gi 14587269 dbj BAB61187.1            | OSJNBb0032H19.20 [Oryza sativa (japonica cultivar-group)]                                 |
| MGGALSSVLGGDAAAAAASADDSSS         | 2.6                     | gi 33621080 gb AAQ23133.1             | thioredoxin H2 [Ipomoea batatas]                                                          |
| MGSFFSTMFTPPPAADDGGDSRVVA         | 2.6                     | gi 28209505 gb AAO37523.1             | putative thioredoxin [Oryza sativa (japonica cultivar-group)]                             |
| MGNFVCIEISGDQMLDRIIRCLCGK         | 2.6                     | gi 15219879 ref NP_176314.1           | disease resistance protein (CC-NBS-LRR class), putative [Arabidopsis thaliana]            |
| MGCCAS---NTAGGSKANRISRWRS         | 2.6                     | gi 22326653 ref NP_196408.2           | leucine rich repeat protein family [Arabidopsis thaliana]                                 |
| MGAASSSIVRSEPFAGKLCGLEDVP         | 2.6                     | gi 15242282 ref NP_200025.1           | F-box protein (SKP1 interacting partner 3-related) [Arabidopsis thaliana]                 |
| MGGCVGKDRSIVEEKLDKGGNVHV          | 2.5                     | gi 24637237 gb AAN63622.1 AF438359_1  | thioredoxin [Triticum aestivum]                                                           |

| Sequence (Supplementary positive) | HMM <sub>80</sub> score | ID                                   | Description                                                                                |
|-----------------------------------|-------------------------|--------------------------------------|--------------------------------------------------------------------------------------------|
| MGNCLDSSAKVDNSNHSPHANSASS         | 2.5                     | gi 15223723 ref NP_172889.1          | protein kinase (APK2a) [Arabidopsis thaliana]                                              |
| MGNCAIKPKVLKDSDEDLVPVERET         | 2.5                     | gi 15237758 ref NP_201274.1          | expressed protein [Arabidopsis thaliana]                                                   |
| MGSLMSGWDSRVRDPKSVRRCKSLT         | 2.5                     | gi 18394756 ref NP_564090.1          | expressed protein [Arabidopsis thaliana]                                                   |
| MGCGGSKVDNQPIVILCRERKELLK         | 2.4                     | gi 15223973 ref NP_177874.1          | expressed protein [Arabidopsis thaliana]                                                   |
| MGNTSSCAPLIISTNSSSGVVKILA         | 2.4                     | gi 15221054 ref NP_173265.1          | hypothetical protein [Arabidopsis thaliana]                                                |
| MGNCMGSSKCASAPLESKVTRSS           | 2.4                     | gi 33146495 dbj BAC79604.1           | putative serine/threonine-specific protein kinase [Oryza sativa (japonica cultivar-group)] |
| MGIYLSTPKTDKFSEDGENHKLRYG         | 2.4                     | gi 15236548 ref NP_194914.1          | protein phosphatase 2C (PP2C), putative [Arabidopsis thaliana]                             |
| MGACISFFSSSSPKTGLHSHATTN          | 2.4                     | gi 30690422 ref NP_195285.3          | protein kinase family [Arabidopsis thaliana]                                               |
| MGNACGGALRSKHQHSFKHAASSQR         | 2.4                     | gi 7428005 pir T03263                | calcium-dependent protein kinase (EC 2.7.1.-) 7 - maize                                    |
| MGGRVARDCSESTRNGGFVGVMVVD         | 2.4                     | gi 24059969 dbj BAC21431.1           | hypothetical protein~predicted by FGENESH etc. [Oryza sativa (japonica cultivar-group)]    |
| MGGFCCCLCTDDFEEY AHPNNPIYR        | 2.4                     | gi 20805222 dbj BAB92889.1           | OSJNBa0093F16.9 [Oryza sativa (japonica cultivar-group)]                                   |
| MGNVCVHVMVNNCVDTKSNSWRPT          | 2.4                     | gi 15227525 ref NP_181133.1          | calcium-dependent protein kinase, putative (CDPK) [Arabidopsis thaliana]                   |
| MGNGLMSKKKKKNNKYKKKRPVNS          | 2.4                     | gi 15224411 ref NP_178561.1          | F-box protein family [Arabidopsis thaliana]                                                |
| MGQGQSGGLPKQPGGERNKGDGQK          | 2.4                     | gi 18479040 gb AAL73395.1 AF432345_1 | 26S proteasome regulatory subunit IV [Tortula ruralis]                                     |
| MGCFGCSSKSSKRSETNKDTVINRK         | 2.3                     | gi 15223024 ref NP_172265.1          | protein kinase family [Arabidopsis thaliana]                                               |
| MGIAFSKNWWSRFSGSSPLSVMVCE         | 2.3                     | gi 34394463 dbj BAC83676.1           | unknown protein [Oryza sativa (japonica cultivar-group)]                                   |
| MGRRRGASSPALGRGRRRRVAGV           | 2.3                     | gi 22324481 dbj BAC10395.1           | hypothetical protein [Oryza sativa (japonica cultivar-group)]                              |
| MGCTHTRHSRKRYQRRVTTRAEHL          | 2.3                     | gi 8467997 dbj BAA96598.1            | unnamed protein product [Oryza sativa (japonica cultivar-group)]                           |

| Sequence (Supplementary positive) | HMM <sub>80</sub> score | ID                                    | Description                                                                           |
|-----------------------------------|-------------------------|---------------------------------------|---------------------------------------------------------------------------------------|
| MGLCHGKSAAVLEPTVEEEEEGATR         | 2.3                     | gi 14133874 gb AAK54157.1 AF368282_1  | CaMK1 [Oryza sativa]                                                                  |
| MGTTSSTSSPLFSVFCSPPLENGR          | 2.3                     | gi 29244700 gb AAO73292.1             | hypothetical protein [Oryza sativa (japonica cultivar-group)]                         |
| MGGYQAVLDPDNQKPSSKNPGYFLS         | 2.2                     | gi 28411895 dbj BAC57341.1            | leaf senescence related protein-like protein [Oryza sativa (japonica cultivar-group)] |
| MGCFGPSKASRTRNNEHDKITRQNP         | 2.2                     | gi 15233098 ref NP_188797.1           | expressed protein [Arabidopsis thaliana]                                              |
| MGLCSPSPSSHDCSSSSPRNSEKKQ         | 2.2                     | gi 25372915 pir  E86343               | T22I11.12 protein - Arabidopsis thaliana                                              |
| MGITHANSITTEPSPSPRPPLLRLL         | 2.2                     | gi 24059896 dbj BAC21362.1            | aminoacyl peptidase-like [Oryza sativa (japonica cultivar-group)]                     |
| MGCIISKKKSPKRNPPWKETLEKRS         | 2.1                     | gi 15241455 ref NP_199242.1           | cyclin-dependent protein kinase-related protein [Arabidopsis thaliana]                |
| MGGRVSKAVACCCCRSQHHGVVVES         | 2.1                     | gi 32488705 emb CAE03448.1            | OSJNBa0088H09.6 [Oryza sativa (japonica cultivar-group)]                              |
| MGSSHAGGEMCMEGGGGRARRAGG          | 2.1                     | gi 7340912 dbj BAA92984.1             | unnamed protein product [Oryza sativa (japonica cultivar-group)]                      |
| MGCTTSHDAFAAARARARASSSSLE         | 2.1                     | gi 20146230 dbj BAB89012.1            | bzip-like transcription factor-like [Oryza sativa (japonica cultivar-group)]          |
| MGQGSPGGLHRQGDRKPDGGEKKEK         | 2.1                     | gi 21593177 gb AAM65126.1             | 26S proteasome subunit 4 [Arabidopsis thaliana]                                       |
| MGNSSVDESAAAIATLAESAAAG           | 2.1                     | gi 33146803 dbj BAC79751.1            | unknown protein [Oryza sativa (japonica cultivar-group)]                              |
| MGSMYRHLRDRSSRRRFSPAWRQE          | 2.1                     | gi 15451581 gb AAK98705.1 AC069158_17 | Hypothetical protein [Oryza sativa]                                                   |
| MGVLFSCPVDDETAAVEDAAPVAEQ         | 2.1                     | gi 22296385 dbj BAC10154.1            | unknown protein [Oryza sativa (japonica cultivar-group)]                              |
| MGQSMSCGRPEHGIFASVQCGDII          | 2.1                     | gi 30684032 ref NP_180450.2           | RING zinc finger ankyrin protein -related [Arabidopsis thaliana]                      |
| MGGSSSSSPTSSSSPAKRGKNKNG          | 2.1                     | gi 7485535 pir  T04515                | hypothetical protein F16A16.50 - Arabidopsis thaliana                                 |



**Supplementary Table 4.** *Arabidopsis thaliana* proteins predicted to contain N-terminal myristoylation sites.

| Sequence (Arabidopsis predict myristoylated) | HM <sub>266</sub> Score | ID          | function | train | description                                                                                          |
|----------------------------------------------|-------------------------|-------------|----------|-------|------------------------------------------------------------------------------------------------------|
| MGLNFTKLF SRLFAKKEMRILMVGL                   | 4.1                     | At5g14670.1 | ARF      | yes   | ADP-ribosylation factor ARF1, putative similar to ADP-ribosylation factor DcARF1 (GI:965483) [Daucu  |
| MGLSFGKLF SRLFAKKEMRILMVGL                   | 7.4                     | At2g47170.1 | ARF      | yes   | ADP-ribosylation factor 1 (ARF1) identical to ADP-ribosylation factor ARF1({Arabidopsis thaliana} (S |
| MGLSFAKLF SRLFAKKEMRILMVGL                   | 6.6                     | At1g23490.1 | ARF      | yes   | ADP-ribosylation factor 1 (ARF1), putative identical to SP:Q9SRC3 ADP-ribosylation factor 1-like [Ar |
| MGLSFAKLF SRLFAKKEMRILMVGL                   | 6.6                     | At1g70490.2 | ARF      | (yes) | ADP-ribosylation factor 1 (ARF1), putative nearly identical to ADP-ribosylation factor 1 GB:P36397 [ |
| MGILFTRMFSSVFGNKEARILVLGL                    | 1.7                     | At2g24765.1 | ARF      | yes   | ADP-ribosylation factor 3 (ARF3) identical to GP:453191 ADP-ribosylation factor 3 {Arabidopsis thali |
| MGLSFGKLF SKLFAKKEMRILMVGL                   | 7.2                     | At3g62290.1 | ARF      | no    | ADP-ribosylation factor identical to GP:166586 ADP-ribosylation factor {Arabidopsis thaliana}; ADP-r |
| MGARFSRIAKRFLPKSKVRILMVGL                    | 7.1                     | At2g15310.1 | ARF      | yes   | ADP-ribosylation factor, putative similar to ADP-ribosylation factor (GI:861205) [Chlamydomonas rein |
| MGQAFRKLFD TFFGNQEMRVV MLGL                  | 4.6                     | At5g17060.1 | ARF      | yes   | ADP-ribosylation factor, putative similar to ADP-ribosylation factor 1; ARF 1 (GP:385340) {Drosophil |
| MGQTFRKLFD TFFGNQEMRVV MLGL                  | 3.9                     | At3g03120.1 | ARF      | yes   | ADP-ribosylation factor, putative similar to ADP-ribosylation factor 1; ARF 1 (GP:385340) {Drosophil |
| MGTTLGKPFAGFFHQEEARIVLFGL                    | 4.3                     | At1g02440.1 | ARF      | yes   | ADP-ribosylation factor, putative similar to ADP-ribosylation factor GB:AAA32729 GI:166586 from (Ara |
| MGAFMSRFWFMMFPAKEYKIVVVGL                    | 1.0                     | At3g22950.1 | ARF      | yes   | ADP-ribosylation factor, putative similar to ADP-ribosylation factor GB:P91924 [Dugesia japonica]    |
| MGLSFAKLF SRLFAKKEMRILMVGL                   | 6.6                     | At1g10630.1 | ARF      | (yes) | ADP-ribosylation factor, putative similar to ADP-ribosylation factor GI:166586 from [Arabidopsis tha |
| MGTALGKPFAGFFHQEESRIVLFGL                    | 5.5                     | At1g02430.1 | ARF      | no    | ADP-ribosylation factor, putative similar to ADP-ribosylation factor GI:166586 from [Arabidopsis tha |
| MGCAQSKIENEEAVTRCKERKQLMK                    | 9.7                     | At1g52320   | bZIP     | yes   | gi 25405541 pir  D96563                                                                              |

| Sequence (Arabidopsis predict myristoylated) | HM <sub>266</sub> Score | ID          | function    | train | description                                                                                          |
|----------------------------------------------|-------------------------|-------------|-------------|-------|------------------------------------------------------------------------------------------------------|
| MGCTASKLDEDAVRRCKERRRLMK                     | 14.1                    | At1g02110.1 | bZIP        | yes   | proline-rich protein family contains proline-rich domain, INTERPRO:IPR000694                         |
| MGCAASKLDNEDAVRRCKDRRRLMK                    | 13.1                    | At3g60320.1 | bZIPprotein | no    | bZIP protein                                                                                         |
| MGGGKSNSSSPDSREVREREGIPEL                    | 2.3                     | At1g21740.1 | bZIPprotein | no    | bzip-related transcription factor similar to GB:AAB81673, EST gb T20649 comes from this gene         |
| MGAIYARQLKEDTSPVTSSRKYSR                     | 3.8                     | At4g30130.1 | bZIPprotein | no    | expressed protein bZIP protein - Arabidopsis thaliana, PID:g600855                                   |
| MGCTSSKLDDLPAVALCRERCAFLE                    | 6.9                     | At4g35240.1 | bZIPprotein | no    | expressed protein bZIP protein - Arabidopsis thaliana, PID:g600855                                   |
| MGGAVTKSETLQKEWVPETKLEAKI                    | 1.9                     | At4g26470.1 | CALB        | no    | calcium-binding EF-hand family protein low similarity to SP P06787 Calmodulin {Saccharomyces cerevis |
| MGCSVSKKKKKKNAMRPPGYEDPELL                   | 10.5                    | At5g24270.1 | CALB(SOS3)  | yes   | calcineurin B-like protein, putative similar to calcineurin B-like protein 8 (GI:15866276) [Arabidop |
| MGCFHSKAAKEFRGHEDPVKLASET                    | 13.3                    | At4g17615.1 | CALB1       | no    | calcineurin B-like protein 1 (CBL1) identical to calcineurin B-like protein 1 (GI:3309082) [Arabidop |
| MGCVCSKQLEGRRQEDISLLASQT                     | 2.2                     | At4g01420.1 | CALB5       | no    | calcineurin B-like protein 5 (CBL5) identical to calcineurin B-like protein 5 (GI:9965366) [Arabidop |
| MGCFHSTAAREFPDHENPVKLASET                    | 13.0                    | At5g47100.1 | CALB9       | no    | calcineurin B-like protein 9 (CBL9) identical to calcineurin B-like protein 9 (GI:5866279) and calci |
| MGNCCSDVASGAGATAGVGGSGSSA                    | 11.1                    | At5g61900.1 | COPINE      | no    | copine BONZAI1 (BON1) nearly identical to BONZAI1 [Arabidopsis thaliana] GI:15487382; contains Pfam  |
| MGGCLSGDVKGGKQAIGGVQQRPTS                    | 6.7                     | At1g08860.1 | COPINE      | no    | copine, putative Similar to BONZAI1 [Arabidopsis thaliana] GI:15487382; contains Pfam profile PF0016 |
| MGGGNSKEESSSPSSSSWASHQSYP                    | 10.7                    | At3g01650.1 | COPINE      | no    | copine-related low similarity to SP Q99829 Copine I {Homo sapiens}                                   |
| MGGSSSKESPRGGGSGRRYERSVSG                    | 12.7                    | At1g67800.1 | COPINE      | yes   | copine-related low similarity to SP Q99829 Copine I {Homo sapiens}                                   |
| MGTGNSKENWRQSSFRSTSASSASP                    | 0.6                     | At5g14420.2 | COPINE      | no    | copine-related low similarity to SP Q99829 Copine I {Homo sapiens}                                   |
| MGNTCVGPSRNGFLQSVSAAMWRPR                    | 4.0                     | At5g04870.1 | CPK01       | yes   | calcium-dependent protein kinase (CDPK)(AK1) identical to calcium-dependent protein kinase, isoform  |

| Sequence (Arabidopsis predict myristoylated) | HM <sub>266</sub> Score | ID          | function | train | description                                                                                          |
|----------------------------------------------|-------------------------|-------------|----------|-------|------------------------------------------------------------------------------------------------------|
| MGNACVGPNIISGNGFLQVTAAAMWR                   | 4.8                     | At3g10660.1 | CPK02    | yes   | calcium-dependent protein kinase (CDPK)(CPK2) identical to calcium-dependent protein kinase isoform  |
| MGHRHSSKSSDPPSSSSSSSSGNV                     | 13.3                    | At4g23650.1 | CPK03    | yes   | calcium-dependent protein kinase, putative (CDPK) similar to calcium-dependent protein kinase [March |
| MGNSCRGSFKDKLDEGDNNKPEDYS                    | 13.9                    | At4g35310.1 | CPK05    | yes   | calcium-dependent protein kinase, putative (CDPK) similar to calmodulin-domain protein kinase CDPK i |
| MGNSCRGSFKDKIYEGNHSRPEENS                    | 10.6                    | At2g17290.1 | CPK06    | yes   | calcium-dependent protein kinase (CDPK)(CPK6) identical to calmodulin-domain protein kinase CDPK iso |
| MGNCCGNPSSATNQSQQGKPKNKNN                    | 16.8                    | At5g12480.1 | CPK07    | yes   | calcium-dependent protein kinase 7 (CDPK)(CPK7) identical to calmodulin-domain protein kinase CDPK i |
| MGNCCASPGSETGSKKGKPKIKSNP                    | 16.2                    | At5g19450.1 | CPK08    | yes   | calcium-dependent protein kinase 19 (CDPK19) identical to calcium-dependent protein kinase [Arabidop |
| MGNCFAKNHGLMKPQQNGNTRRSVE                    | 12.3                    | At3g20410.1 | CPK09    | yes   | calcium-dependent protein kinase 9 (CDPK)(CPK9) identical to calmodulin-domain protein kinase CDPK i |
| MGNCNACVRPDSKESKPSKPKKPN                     | 12.4                    | At1g18890   | CPK10    | yes   | <a href="#">gi 28416563 gb AAO42812.1 </a>                                                           |
| MGNCCRSPAAVAREDVKSNSYSGHDH                   | 11.1                    | At3g51850.1 | CPK13    | no    | calcium-dependent protein kinase, putative (CDPK) similar to calcium-dependent protein kinase [Arabi |
| MGNCCGTAGSLIQDKQKKGFKLPNP                    | 15.0                    | At2g41860.1 | CPK14    | yes   | calcium-dependent protein kinase, putative (CDPK) similar to calmodulin-domain protein kinase CDPK i |
| MGCFSSKHRNTESDIINGSVQSSIP                    | 16.3                    | At4g21940.1 | CPK15    | yes   | calcium-dependent protein kinase, putative (CDPK) similar to calcium-dependent protein kinase [Nicot |
| MGLCFSSAAKSSGHNRSSRNPHPHP                    | 19.2                    | At2g17890.1 | CPK16    | yes   |                                                                                                      |
| MGNCCSHGRDSADNGDALENGASAS                    | 16.7                    | At5g12180.1 | CPK17    | yes   | calcium-dependent protein kinase, putative (CDPK)                                                    |
| MGLCFSSPKATTRGTGSRNPNDSP                     | 17.3                    | At4g36070.1 | CPK18    | yes   | Calcium-dependent serine/threonine protein kinase calcium-dependent protein kinase isoform AK1, Arab |
| MGNTCVGPNLNPNGLQSVSAAVWR                     | 4.8                     | At2g38910.1 | CPK20    | yes   | calcium-dependent protein kinase, putative (CDPK) similar to calcium-dependent protein kinase, isofo |
| MGCFSSKHRKTQNDGGEKSIPINPV                    | 19.2                    | At4g04720.1 | CPK21    | yes   | calcium-dependent protein kinase, putative (CDPK) similar to calcium-dependent protein kinase(CDPK)  |
| MGNCCGSKPLTASDIVSDQKQETIL                    | 10.4                    | At4g04710.1 | CPK22    | yes   | calcium-dependent protein kinase, putative (CDPK) similar to calcium-dependent protein kinase [Nicot |

| Sequence (Arabidopsis predict myristoylated) | HM <sub>266</sub> Score | ID          | function | train | description                                                                                          |
|----------------------------------------------|-------------------------|-------------|----------|-------|------------------------------------------------------------------------------------------------------|
| MGCFSSKHRKTQNDGGGERSIPIIP                    | 17.7                    | At4g04740.1 | CPK23    | yes   | calcium-dependent protein kinase, putative (CDPK) similar to calcium-dependent protein kinase [Lycop |
| MGSCVSSPLKGSFGRPVRRRHSS                      | 15.1                    | At2g31500.1 | CPK24    | yes   | calcium-dependent protein kinase, putative (CDPK) similar to calcium-dependent protein kinase [Arabi |
| MGNVCVHVMVNNCVDTKSNSWVRPTD                   | 3.4                     | At2g35890.1 | CPK25    | no    | calcium-dependent protein kinase, putative (CDPK) similar to calcium-dependent protein kinase, isofo |
| MGCFSSKELQQSKRTILEKPLVDIT                    | 6.5                     | At4g04700.1 | CPK27    | yes   | protein kinase, putative similar to calcium-dependent protein kinase [Nicotiana tabacum] gi 3283996  |
| MGVCFSAIRVTGASSRRSSQTKSK                     | 12.5                    | At5g66210.2 | CPK28    | yes   | calcium-dependent protein kinase                                                                     |
| MGNCIACVKFDPDNSKPNQKKKPPR                    | 11.1                    | At1g74740.1 | CPK30    | yes   | calcium-dependent protein kinase, putative (CDPK) similar to calcium-dependent protein kinase [Arabi |
| MGCYSSKNLQSKRTILEKPFVDIG                     | 4.8                     | At4g04695.1 | CPK31    | yes   | calcium-dependent protein kinase, putative (CDPK) similar to calcium-dependent protein kinase [Lycop |
| MGNCCGTAGSLAQNDNKPKKGRKKQ                    | 12.1                    | At3g57530.1 | CPK32    | no    | calcium-dependent protein kinase, putative (CDPK) similar to calmodulin-domain protein kinase CDPK i |
| MGNCLAKKYGLVMKPQQNGERSVEI                    | 9.2                     | At1g50700.1 | CPK33    | yes   | calcium-dependent protein kinase, putative (CDPK) similar to calmodulin-domain protein kinase CDPK i |
| MGNCCSHGRSDDDNKEEPRPENGEGG                   | 20.7                    | At5g19360.1 | CPK34    | yes   | calcium-dependent protein kinase, putative (CDPK) similar to calcium-dependent protein kinase [March |
| MGICHGKPVQQSKSLPVSGETNEA                     | 8.2                     | At2g41140.1 | CRK1     | no    | calcium-dependent protein kinase, putative (CDPK) similar to calcium/calmodulin-dependent protein ki |
| MGGCTSKPSSSVKPNPYAPKDAVLQ                    | 15.6                    | At3g19100.1 | CRK2     | no    | calcium-dependent protein kinase, putative (CDPK) similar to calcium/calmodulin-dependent protein ki |
| MGQCYGKVNQSKQNGEEEEANTTTYV                   | 9.2                     | At2g46700.1 | CRK3     | no    | calcium-dependent protein kinase, putative (CDPK) similar to calcium/calmodulin-dependent protein ki |
| MGHCYSRNISAVEDDEIPTGNDEV                     | 7.7                     | At5g24430   | CRK4     | no    | CDPK-related protein kinase isoform 4 (ppc:4.2.1)                                                    |
| MGLCTSKPNSSNSDQTPARNSPLPA                    | 17.0                    | At3g50530.1 | CRK5     | no    | calcium-dependent protein kinase, putative (CDPK) similar to calcium/calmodulin-dependent protein ki |
| MGHCYSRNISTVDDDDEIPSATAQL                    | 13.4                    | At3g49370.1 | CRK6     | yes   | calcium-dependent protein kinase, putative (CDPK) similar to calcium/calmodulin-dependent protein ki |
| MGLCHGKPIEQSKNLPISNEIET                      | 7.7                     | At3g56760.1 | CRK7     | no    | calcium-dependent protein kinase, putative (CDPK) similar to calcium/calmodulin-dependent protein ki |
| MGGCTSKPSTSSGRPNPFAPGNDYP                    | 18.8                    | At1g49580.1 | CRK8     | no    | calcium-dependent protein kinase, putative (CDPK) similar to calcium/calmodulin-dependent protein ki |
| MGTSVSKPVSDDKKKGTSVSKPVKN                    | 11.4                    | At1g33880.1 | disease  | no    | AIG1-related protein similar to AIG1 protein GB:P54120 [Arabidopsis thaliana], NTGP4 GB:AAD09518 [Ni |

| Sequence (Arabidopsis predict myristoylated) | HM <sub>266</sub> Score | ID          | function | train | description                                                                                          |
|----------------------------------------------|-------------------------|-------------|----------|-------|------------------------------------------------------------------------------------------------------|
| MGACFSVAISCDQAVNNLTSCLSRN                    | 16.1                    | At5g05400.1 | disease  | no    | disease resistance protein (CC-NBS-LRR class), putative domain signature CC-NBS-LRR exists, suggesti |
| MGACLTLFSFCDEVVNQISQGLCIN                    | 11.3                    | At1g12280.1 | disease  | no    | disease resistance protein (CC-NBS-LRR class), putative domain signature CC-NBS-LRR exists, suggesti |
| MGGCVSVQVSCDQLLNHLGRCFCRK                    | 13.4                    | At1g12290.1 | disease  | yes   | disease resistance protein (CC-NBS-LRR class), putative domain signature CC-NBS-LRR exists, suggesti |
| MGGCVSVSISCDQLTKNVCCLNRN                     | 11.4                    | At5g63020.1 | disease  | yes   | disease resistance protein (CC-NBS-LRR class), putative domain signature CC-NBS-LRR exists, suggesti |
| MGGCVSVSLSCDREVNQFSQWLCVVS                   | 14.2                    | At1g12210.1 | disease  | yes   | disease resistance protein (CC-NBS-LRR class), putative domain signature CC-NBS-LRR exists, suggesti |
| MGISFSIPFDPCVNKVSQWLDMKGS                    | 4.0                     | At1g62630.1 | disease  | yes   | disease resistance protein (CC-NBS-LRR class), putative domain signature CC-NBS-LRR exists, suggesti |
| MGISFSIPFDPCVNKVSQWLDMKVS                    | 3.3                     | At1g63350.1 | disease  | no    | disease resistance protein (CC-NBS-LRR class), putative domain signature CC-NBS-LRR exists, suggesti |
| MGISFSIPFDPCVNKVSQWLDMKVS                    | 3.3                     | At1g63360.1 | disease  | no    | disease resistance protein (CC-NBS-LRR class), putative domain signature CC-NBS-LRR exists, suggesti |
| MGNVALEISCDQTLNHACGCLFGD                     | 7.6                     | At1g15890.1 | disease  | no    | disease resistance protein (CC-NBS-LRR class), putative domain signature CC-NBS-LRR exists, suggesti |
| MGNNFSVESPSLAPFLCGKRKYLYN                    | 9.7                     | At5g47260.1 | disease  | no    | disease resistance protein (CC-NBS-LRR class), putative domain signature CC-NBS-LRR exists, suggesti |
| MGSCFSLQVSDQTLNRIFNCLIGKS                    | 4.3                     | At1g61180.1 | disease  | no    | disease resistance protein (CC-NBS-LRR class), putative domain signature CC-NBS-LRR exists, suggesti |
| MGSCISLQISCDQVLTRAYSCFFSL                    | 9.2                     | At4g10780.1 | disease  | no    | disease resistance protein (CC-NBS-LRR class), putative domain signature CC-NBS-LRR exists, suggesti |

| Sequence (Arabidopsis predict myristoylated) | HM <sub>266</sub> Score | ID          | function | train | description                                                                                                      |
|----------------------------------------------|-------------------------|-------------|----------|-------|------------------------------------------------------------------------------------------------------------------|
| MGCCFSVQFSFDDQTLVRIFNFLCG                    | 1.5                     | At1g61300.1 | disease  | no    | disease resistance protein (NBS-LRR class), putative domain signature NBS-LRR exists, suggestive of              |
| MGSVMSLGC SKRKATN QDV DSESRK                 | 5.8                     | At3g44480.1 | disease  | yes   | disease resistance protein (TIR-NBS-LRR class), putative domain signature TIR-NBS-LRR exists, sugges             |
| MGSAMSLSCSKRKATSQDV DSESECK                  | 5.4                     | At3g44630.3 | disease  | no    | disease resistance protein RPP1-WsB-like (TIR-NBS-LRR class), putative domain signature TIR-NBS-LRR              |
| MGGCFSVSLPCDQVVSQFSQLLCVR                    | 16.4                    | At1g12220.1 | disease  | yes   | disease resistance protein RPS5 (resistance to Pseudomonas syringae protein 5)(CC-NBS-LRR class) dom             |
| MGSVMSLGC SKRKATSQDV DSESRK                  | 5.7                     | At3g44670   | disease  | yes   | gi 11357250 pir T47442                                                                                           |
| MGLLCRSRHHHTEDTDENTQAAEIE                    | 11.6                    | At2g26300.1 | GTPB     | yes   | G protein alpha subunit 1 (GPA1) identical to GB:M32887                                                          |
| MGCASSLPDRNSGTL SGLS NSENAV                  | 9.6                     | At3g54840.1 | GTPB     | yes   | GTP-binding protein (Ara6)                                                                                       |
| MGCVFGREAAATTTTAEAKQAKSSKA                   | 7.4                     | At1g54610.1 | KINASE   | no    | CRK1 protein -related similar to CRK1 protein GI:7671528 from [Beta vulgaris] - cdc Related 4.5.2                |
| MGCICSKGVRTNDDYIETNHV SIGK                   | 15.9                    | At1g57700.1 | KINASE   | no    | CRK1 protein -related similar to CRK1 protein GI:7671528 from [Beta vulgaris]putative protein kinase (ppc:4.5.2) |
| MGCGKSKHDVVTGNTTRIKKPSEAE                    | 3.1                     | At4g15650.1 | KINASE   | no    | kinase like protein                                                                                              |
| MGCCQSSFLKPSLHDKKITSDDL S                    | 10.0                    | At1g50990.1 | KINASE   | no    | protein kinase - related low similarity to SP Q06548 APKA_ARATH Protein kinase APK1A Arabidopsis tha             |
| MGNCL-KPLKEQPPSASP KPLTIPS                   | 10.0                    | At5g11410.1 | KINASE   | no    | protein kinase family contains eukaryotic protein kinase domain, INTERPRO:IPR000719                              |
| MGACISFFSSSSPSKTGLHSHATTN                    | 4.1                     | At4g35600.1 | KINASE   | no    | protein kinase family contains protein kinase domain, Pfam:PF00069                                               |
| MGARCSKFSFCLF PSHFKSASVLES                   | 8.9                     | At3g54030.1 | KINASE   | no    | protein kinase family contains protein kinase domain, Pfam:PF00069                                               |
| MGCCQSLFSGDNPLGKDG VQPQPLS                   | 13.8                    | At4g35230.1 | KINASE   | no    | protein kinase family contains protein kinase domain, Pfam:PF00069                                               |
| MGCEVSKLSALCCVSESGRSNP DVT                   | 2.7                     | At5g41260.1 | KINASE   | no    | protein kinase family contains protein kinase domain, Pfam:PF00069                                               |
| MGCFGCSKKSSKRSETNKDTVINRK                    | 6.5                     | At1g07870.1 | KINASE   | no    | protein kinase family contains protein kinase domain, Pfam:PF00069                                               |

| Sequence (Arabidopsis predict myristoylated) | HM <sub>266</sub> Score | ID          | function      | train | description                                                                                          |
|----------------------------------------------|-------------------------|-------------|---------------|-------|------------------------------------------------------------------------------------------------------|
| MGCFGRTPKSNKRSDTKTTKNNDFT                    | 5.8                     | At2g28590.1 | KINASE        | no    | protein kinase family contains protein kinase domain, Pfam:PF00069                                   |
| MGCLHSKTANLPSSDDPSAPNKPES                    | 8.8                     | At5g46570.1 | KINASE        | no    | protein kinase family contains protein kinase domain, Pfam:PF00069                                   |
| MGCVNSRHRPFRRKSTTLKESSEK                     | 1.0                     | At1g03740.1 | KINASE        | no    | protein kinase family contains protein kinase domain, Pfam:PF00069                                   |
| MGGCCFSTPLDNNQPPQPQIPPGE                     | 3.3                     | At2g17170.1 | KINASE        | no    | protein kinase family contains protein kinase domain, Pfam:PF00069                                   |
| MGNCLSASTLPTEPNAPKSVEEGVK                    | 12.6                    | At5g25440.1 | KINASE        | no    | protein kinase family contains protein kinase domain, Pfam:PF00069                                   |
| MGLPHSGSVSPLSPLGEACSRRLT                     | 0.9                     | At4g00710.1 | KINASE        | no    | protein kinase family low similarity to protein kinase [Arabidopsis thaliana] GI:2852449; contains P |
| MGRSSSKKKKKRGGSGRRGQLKDHG                    | 6.7                     | At3g59410.1 | KINASE        | no    | protein kinase like GCN2 - Saccharomyces cerevisiae, EMBL:M27082                                     |
| MGLCWGSPSDSPPTTTPSSTGNISS                    | 6.1                     | At2g17220.1 | KINASE        | no    | protein kinase -related contains a protein kinase domain profile (PDOC00100)                         |
| MGCVNSKQTVSVTPAIDHSGVFRDN                    | 7.7                     | At1g18670.1 | KINASE        | no    | protein kinase -related similar to CRK1 protein GI:7671528 from [Beta vulgaris] putative 4.5.2       |
| MGCVSSKQTVSVTPAIDHSGVFKDN                    | 9.8                     | At1g74330.1 | KINASE        | no    | protein kinase -related similar to p58 protein kinase GB:AAB59449 (Homo sapiens); contains Pfam prof |
| MGCICATARSPSAAVTDKDLLDSSK                    | 8.2                     | At1g71530.1 | KINASE        | no    | protein kinase -related similar to protein kinase GB:4502731 from (Homo sapiens)                     |
| MGICFSAEDQHYQFSQQQNYPKKTT                    | 4.8                     | At2g07180.1 | KINASE        | no    | protein kinase, putative contains protein kinase domain, Pfam:PF00069                                |
| MGNCWCRFEPLNHRVSPANAKSESPK                   | 4.3                     | At5g56460.1 | KINASE        | no    | protein kinase, putative contains protein kinase domain, Pfam:PF00069                                |
| MGNCFESCKRNDNEDDNLDSVNSK                     | 5.2                     | At1g74490.1 | KINASE        | no    | protein kinase, putative similar to protein kinase [Arabidopsis thaliana] gi 2852449 dbj BAA24695; c |
| MGSCFSSRVKADIFHNGKSSDLYGL                    | 12.1                    | At2g39660.1 | KINASE        | no    | protein kinase, putative similar to protein kinase gi 166809 gb AAA18853                             |
| MGCSFSGLNALYDAVNGGGDVWINE                    | 2.9                     | At5g08160.2 | KINASE        | no    | serine/threonine protein kinase, putative identical to serine/threonine protein kinase [Arabidopsis  |
| MGICLSAQVKAESSGASTKYDAKDI                    | 6.9                     | At1g07570.1 | KINASE - APK1 | no    | protein kinase (APK1a) identical to Protein kinase APK1A from [Arabidopsis thaliana] SWISS-PROT:Q065 |

| Sequence (Arabidopsis predict myristoylated) | HM <sub>266</sub> Score | ID          | function        | train | description                                                                                          |
|----------------------------------------------|-------------------------|-------------|-----------------|-------|------------------------------------------------------------------------------------------------------|
| MGICLSAQIKAVSPGASPKYMSSEA                    | 5.1                     | At2g28930.1 | KINASE - APK1   | no    | protein kinase (APK1b) identical to protein kinase APK1B [Arabidopsis thaliana] SWISS-PROT:P46573    |
| MGNCLDSSAKVDNSNHSPHANSASSG                   | 1.0                     | At1g14370.1 | KINASE - APK1   | no    | protein kinase (APK2a) identical to protein kinase APK2a GI:2852447 from [Arabidopsis thaliana]      |
| MGNCLDSSAKVDSSSHSPHANSASLS                   | 1.1                     | At2g02800.1 | KINASE - APK1   | no    | protein kinase (APK2b) identical to protein kinase APK2b [Arabidopsis thaliana] gi 2852449 dbj BAA24 |
| MGCCYLSSTVDPVQDHTTDASEP                      | 18.5                    | At2g17090.1 | KINASE - APK1   | no    | protein kinase family similar to Arabidopsis thaliana APK1A [SP Q06548], APK1B [SP P46573]; contains |
| MGGCFSNRIKTDIASSTWLSSKFLS                    | 5.2                     | At5g02290.2 | KINASE - APK1   | no    | protein kinase, putative similar to protein kinase APK1A [Arabidopsis thaliana] SWISS-PROT:Q06548    |
| MGCISKNVSLTDQGDSPLPEPGL                      | 15.1                    | At5g39420.1 | KINASE - CDC    | no    | cdc2-related protein                                                                                 |
| MGCFNSKHSSPAGPPRPVRRRLDTN                    | 17.1                    | At3g01085.1 | KINASE - CDC    | no    | cdc2-related protein temporary automated functional assignment                                       |
| MGCNCTKGTRPDNDNVDNSNSIVSN                    | 14.5                    | At1g09600.1 | KINASE - CDC    | no    | protein kinase -related Similar to cdc2 protein kinases                                              |
| MGCICSKGAAEDEEGVVYHREKANE                    | 11.2                    | At1g33770.1 | KINASE - CDC    | no    | protein kinase -related similar to cdc2-related protein kinase GB:AAA58424 GI:180492 from [Homo sapi |
| MGNANGKDEDAAGSGGADVTSSSA                     | 4.6                     | At5g21170.1 | KINASE - cyclin | no    | AMPKBI (5'-AMP-activated protein kinase, beta subunit, complex-interacting region) domain family con |
| MGCVLGRPGSSGSVSGSRDEVSTRI                    | 10.8                    | At3g05050.1 | KINASE - cyclin | no    | cyclin-dependent protein kinase -related similar to cyclin-dependent kinase GB:CAA65979 from [Medica |
| MGCVLCKESTGDKRKHNNPDEPPPA                    | 14.0                    | At5g50860.1 | KINASE - cyclin | yes   | cyclin-dependent protein kinase-related                                                              |
| MGCIISKKKSPKRNPWKETLEKRS                     | 2.9                     | At5g44290.1 | KINASE - cyclin | no    | cyclin-dependent protein kinase-related protein                                                      |
| MGCFGCCGGGEDFRRVSETGPKPVH                    | 6.9                     | At3g17410.1 | KINASE- Pto     | no    | serine/threonine protein kinase, putative similar to Pto kinase interactor 1 GB:AAC61805 from [Lycop |
| MGSSFRSSSRNEHEDGGDEAEHAL                     | 9.2                     | At2g37280.1 | MISC            | no    | ABC transporter family protein similar to PDR5-like ABC transporter GI:1514643 from [Spirodela polyr |
| MGGAGGTVTATSPGTSSAENNTWSS                    | 3.4                     | At1g49720.1 | MISC            | no    | abscisic acid responsive elements-binding factor identical to abscisic acid responsive elements-bind |



| Sequence (Arabidopsis predict myristoylated) | HM <sub>266</sub> Score | ID          | function | train | description                                                                                          |
|----------------------------------------------|-------------------------|-------------|----------|-------|------------------------------------------------------------------------------------------------------|
| MGNASAGERARNTGVQANELVESAL                    | 3.3                     | At3g06810.1 | MISC     | no    | acetyl-coA dehydrogenase -related similar to acetyl-coenzyme A dehydrogenase GB:NP_031408 from [Mus  |
| MGMNASLHTTMSDPSNLNHHSIGQA                    | 0.6                     | At3g23280.2 | MISC     | no    | auxin-regulated protein contains Pfam profile: PF00023 ankyrin repeat                                |
| MGIVTSFAPPEASSSGDNSKVLPI                     | 0.6                     | At1g64170.1 | MISC     | no    | cation/hydrogen exchanger, putative (CHX16) monovalent cation:proton antiporter family 2 (CPA2) memb |
| MGCLRSLVRRKQFDSSNGKAETHHH                    | 7.5                     | At5g36940.1 | MISC     | no    | cationic amino acid transporter -related protein cationic amino acid transporter-1, rat, PIR:T46813  |
| MGTASSKSNINLSQVLNTEEPYSSV                    | 2.7                     | At4g22710.1 | MISC     | no    | cytochrome P450 family contains Pfam profile: PF00067 cytochrome p450                                |
| MGASHSHEDLEICSSDEDEYEEYEE                    | 6.4                     | At4g33400.1 | MISC     | yes   | Dem -related protein Dem (defective embryo and meristems) protein -Lycopersicon esculentum, PID:e321 |
| MGTSQSREDRISESDTESDSYEE                      | 6.7                     | At3g19240.1 | MISC     | yes   | dem-related protein similar to dem GB:CAA73973 from [Lycopersicon esculentum] (Plant Cell (1998) 10  |
| MGNSFGCSASGERLVSAARDGDFVE                    | 7.9                     | At5g07270.1 | MISC     | no    | expressed protein ankyrins - different species                                                       |
| MGNVTSNVAAKFAFFPEPATYGV                      | 0.8                     | At4g31020.1 | MISC     | no    | expressed protein BEM46 PROTEIN, Schizosaccharomyces pombe, PID:D1022245 (alpha beta hydrolase)      |
| MGNLRCISQEQDPNQKKPSSVVNG                     | 8.9                     | At1g69240.1 | MISC     | no    | hydrolase, alpha/beta fold family low similarity to SP Q40708 PIR7A protein {Oryza sativa}, polyneur |
| MGNSFTCISHEQEQRPKKSSGGGGN                    | 8.6                     | At1g26360.1 | MISC     | no    | hydrolase, alpha/beta fold family similar to SP Q40708 PIR7A protein {Oryza sativa}, ethylene-induce |
| MGNLCSLFTPPKPVKKRKPITKRQS                    | 8.4                     | At3g29770.1 | MISC     | no    | hydrolase, alpha/beta fold family similar to SP Q40708 PIR7A protein {Oryza sativa}, polyneuridine a |
| MGCAGAAATDSPIQMNGLPISYAP                     | 2.0                     | At3g16150.1 | MISC     | no    | L-asparaginase -related similar to L-ASPARAGINASE GB:P30364from [Lupinus angustifolius]              |
| MGTKVTVISTSERKRDEAVTRLGAD                    | 0.9                     | At4g37980.1 | MISC     | no    | mannitol dehydrogenase (ELI3-1), putative identical to GI:16267                                      |

| Sequence (Arabidopsis predict myristoylated) | HM <sub>266</sub> Score | ID          | function | train | description                                                                                                         |
|----------------------------------------------|-------------------------|-------------|----------|-------|---------------------------------------------------------------------------------------------------------------------|
| MGKSGGRKKKSGGSNSNSSQVNSSE                    | 0.9                     | At1g62390.1 | MISC     | no    | octicosapeptide/Phox/Bem1p (PB1) domain-tetratricopeptide repeat (TPR)-containing protein contains                  |
| MGCTSSKQAKANVVADVYPKPPSSSF                   | 11.6                    | At1g64500.1 | MISC     | no    | peptide transporter -related                                                                                        |
| MGNNGNSREAKESRRSRLRHKLQKFR                   | 5.9                     | At5g57190.1 | MISC     | no    | phosphatidylserine decarboxylase, putative similar to SP P53037 Phosphatidylserine decarboxylase pro                |
| MGNNGNSTETKESRRSKMRKKIQNFR                   | 0.9                     | At4g25970.1 | MISC     | no    | phosphatidylserine decarboxylase, putative similar to SP P53037 Phosphatidylserine decarboxylase pro                |
| MGSVASLALAIIVVKGKDSSKLWGLV                   | 1.5                     | At4g18130.1 | MISC     | no    | phytochrome E (PHYE) identical to SP P42498 Phytochrome E { Arabidopsis thaliana }                                  |
| MGNLHGIHRSHHGGSNFPGEAPNSP                    | 5.2                     | At3g09540.1 | MISC     | no    | polysaccharide lyase family 1 (pectate lyase) similar to style development-specific protein 9612 SP:                |
| MGLCFSSTYATVDVMPHEVDTEVPD                    | 5.2                     | At3g49500.1 | MISC     | no    | RNA-dependent RNA polymerase SDE1 RNA-directed RNA polymerase                                                       |
| MGHATSLSHFLILSSSRFSRLGSLT                    | 0.7                     | At2g25840.1 | MISC     | no    | tryptophanyl-tRNA synthetase -related                                                                               |
| MGNTRRSGGGGGRNKNKRSRKGGS                     | 1.6                     | At4g34910.1 | NUCLEAR  | no    | DEAD/DEAH box helicase, putative                                                                                    |
| MGHFASNCEGKPKKRAGESDEKGDG                    | 1.3                     | At1g75660.1 | NUCLEAR  | no    | Dhp1-related protein similar to Dhp1 protein GB:BAA04601 GI:496393 from [Schizosaccharomyces pombe] Exoribonuclease |
| MGSHSSQLSSELVEEGSERAIVSP                     | 2.7                     | At4g25540.1 | NUCLEAR  | no    | DNA mismatch repair protein MSH3 identical to SP O65607 DNA mismatch repair protein MSH3 (AtMsh3) {A}               |
| MGSSFSASFSTNSTTAAAVPPPSPPS                   | 8.7                     | At1g18680.1 | NUCLEAR  | no    | expressed protein contains similarity to DNA dependent reverse transcriptase GI:2920563 from [Spragu                |
| MMSGESGSFSPSPQQLKIENDML                      | 1.8                     | At3g01410.1 | NUCLEAR  | no    | RNase H domain-containing protein low similarity to GAG-POL precursor [Oryza sativa (japonica cultiv                |
| MGASASVPERSVHQFTVKDSSGKDL                    | 5.3                     | At2g48150.1 | PEROX    | no    | glutathione peroxidase, putative                                                                                    |
| MGASSSSSVSEKSIHQFTVKDSSGK                    | 1.2                     | At3g63080.1 | PEROX    | no    | glutathione peroxidase, putative phospholipid-hydroperoxide glutathione peroxidase, spinach, PIR:JC5                |
| MGCYVVGSAKSKEKVDLLKTKFGFD                    | 1.6                     | At5g16980.1 | PEROX    | no    | NADP-dependent oxidoreductase, putative strong similarity to probable NADP-dependent oxidoreductase                 |
| MGSCVSKGKGDDDSVHNVEFSGGNV                    | 16.9                    | At3g08710.1 | PEROX    | no    | thioredoxin family similar to thioredoxin H-type GB:P29448 SP P29448 [Arabidopsis thaliana], Thiored                |

| Sequence (Arabidopsis predict myristoylated) | HM <sub>266</sub> Score | ID          | function | train | description                                                                                          |
|----------------------------------------------|-------------------------|-------------|----------|-------|------------------------------------------------------------------------------------------------------|
| MGGALSTVFGSGEDATAAGTESEPS                    | 9.2                     | At5g39950.1 | PEROX    | yes   | thioredoxin H-type 2 (TRX-H-2) identical to SP Q38879 Thioredoxin H-type 2 (TRX-H-2) {Arabidopsis th |
| MGANVSTPDQRFQVTHFRSTKPWTP                    | 8.9                     | At1g69880.1 | PEROX    | no    | thioredoxin, putative similar to SP Q38879 Thioredoxin H-type 2 (TRX-H-2) {Arabidopsis thaliana}; co |
| MMSGASKNTEEDDDGSNGGGGQLYV                    | 12.8                    | At1g07110.1 | PHOS     | yes   | fructose-2,6-bisphosphatase -related similar to fructose-2,6-bisphosphatase GI:8572069 from [Arabido |
| MGGCVSTSSKSTCSSWSNGEKPVRR                    | 14.6                    | At4g03415.1 | PHOS     | no    | protein phosphatase 2C (PP2C) -related temporary automated functional assignment                     |
| MGSCLSAESRSPRPGSPCSPAFSVR                    | 13.5                    | At3g02750.1 | PHOS     | no    | protein phosphatase 2C (PP2C) similar to putative protein phosphatase-2C (PP2C) GB:AAC36699 [Mesembr |
| MGSCLSGGGSRSLHGSPHVP                         | 9.1                     | At5g36250.1 | PHOS     | no    | protein phosphatase 2C (PP2C), putative                                                              |
| MGTYLSSPKTEKLSGENDKLRFG                      | 4.2                     | At2g25070.1 | PHOS     | no    | protein phosphatase 2C (PP2C), putative                                                              |
| MGFCFLSSGGSTDKSQIYEITDYG                     | 8.5                     | At4g32950.1 | PHOS     | no    | protein phosphatase 2C (PP2C), putative phosphoprotein phosphatase, Arabidopsis thaliana, PIR2:S5545 |
| MGYLNSVLSSSSQVHSDGDPVSGGG                    | 2.9                     | At4g31750.1 | PHOS     | no    | protein phosphatase 2C (PP2C), putative protein phosphatase 2C, Medicago sativa, PID:g2582800        |
| MGIYLSTPKTDKFSGENDGKLRYG                     | 4.3                     | At4g31860.1 | PHOS     | no    | protein phosphatase 2C (PP2C), putative protein phosphatase 2C, Schizosaccharomyces pombe, PIR2:S542 |
| MGVCCSKGTGIIVEHGADDGNECGD                    | 12.2                    | At5g01700.1 | PHOS     | no    | protein phosphatase 2C (PP2C), putative protein phosphatase type 2C - Saccharomyces cerevisiae, EMBL |
| MGHCFSLPSSQSEIHEDNEHGDGNV                    | 8.8                     | At5g26010.1 | PHOS     | no    | protein phosphatase 2C (PP2C), putative protein phosphatase-2C, Mesembryanthemum crystallinum, AF075 |
| MGLCHSKIDKTTRKETGATSTATTT                    | 12.4                    | At1g16220.1 | PHOS     | no    | protein phosphatase 2C -related similar to GB:AAC36699                                               |
| MGLCYSVDRTTGKEPGEASSTATTA                    | 11.0                    | At1g79630.1 | PHOS     | no    | protein phosphatase-2C -related similar to protein phosphatase-2C GI:3643088 from [Mesembryanthemum  |
| MGLKLSRGPVKEKSPLEFTRVHILT                    | 2.3                     | At5g39400.1 | PHOS     | yes   | PTEN -related protein PTEN/MMAC1, Rattus norvegicus, EMBL:AF017185                                   |

| Sequence (Arabidopsis predict myristoylated) | HM <sub>266</sub> Score | ID          | function   | train | description                                                                                          |
|----------------------------------------------|-------------------------|-------------|------------|-------|------------------------------------------------------------------------------------------------------|
| MGNNGFSYSSSSSFGNEERNDGSAS                    | 9.2                     | At5g56110.1 | TRANSCRIPT | no    | myb family transcription factor contains PFAM profile: Myb DNA binding domain PF00249                |
| MGGSGSSSSSISNLAENKSSGSLLL                    | 7.9                     | At5g23000.1 | TRANSCRIPT | no    | myb family transcription factor contains PFAM profile: myb DNA binding domain PF00249;               |
| MGRCGRSNDGVIGGVRPYVRSPVPR                    | 2.3                     | At1g14600.1 | TRANSCRIPT | no    | myb family transcription factor contains Pfam profile: PF00249 myb-like DNA-binding domain           |
| MGDFDSTSKSKAKRQKRIEVRFASP                    | 1.1                     | At1g68150.1 | TRANSCRIPT | no    | WRKY family transcription factor similar to DNA-binding protein ABF2 GI:1159879 from [Avena fatua]   |
| MGQGPSGLNRQGDRKPDGGEKKEK                     | 0.7                     | At2g20140.1 | UBQ        | no    | 26S proteasome subunit 4                                                                             |
| MGANISGGSPFDRNDDVYSRKLRL                     | 6.4                     | At3g61060.1 | UBQ        | no    | F-box protein (lectin-related) low similarity to PP2 lectin polypeptide [Cucurbita maxima] GI:410437 |
| MGAASSSIVRSEPFAGKLCGLEDVP                    | 6.0                     | At5g52120.1 | UBQ        | no    | F-box protein (SKP1 interacting partner 3-related) contains Pfam profile PF00646: F-box domain       |
| MGVAHSDLHNDLSSSSCFGDRNILK                    | 3.0                     | At1g12710.1 | UBQ        | no    | F-box protein (SKP1 interacting partner 3-related) contains Pfam profile PF00646: F-box domain       |
| MGHKQSVDSRGKGRKVPGSSSMVQK                    | 2.3                     | At2g02250.1 | UBQ        | no    | F-box protein (SKP1 interacting partner 3-related) contains similarity to SKP1 interacting partner 3 |
| MGSSLCVAVRKKEKQKQKKTVVFLP                    | 2.0                     | At3g52320.1 | UBQ        | no    | F-box protein family contains F-box domain Pfam:PF00646                                              |
| MGSVMSLSCSKRKATSQDVECSSES                    | 5.4                     | At1g22040.1 | UBQ        | no    | Kelch repeat containing F-box protein family contains Pfam profiles PF01344: Kelch motif, PF00646: F |
| MGAAGSKLEKALGDQFPEGERYFGF                    | 7.1                     | At4g39910.1 | UBQ        | yes   | ubiquitin-specific protease 3 (UBP3) identical to GI:2347098                                         |
| MGAAGSKLEKALGDQFPEGERYFGF                    | 7.1                     | At2g22310.1 | UBQ        | (yes) | ubiquitin-specific protease 4 (UBP4) identical to GI:2347100                                         |
| MGNAIRLLRKCLNSHGVSASSGGVS                    | 4.5                     | At3g56170.1 | UNKN       | no    |                                                                                                      |
| MGGKSSKSKNVEFGSPSTPVQIKI                     | 9.4                     | At2g18630.1 | UNKN       | no    | At14a, putative similar to At14a, GI:11994571 and GI:11994573 [Arabidopsis thaliana]; unusual splice |
| MGCVC GKPSAIEDSKDSPRERFSSK                   | 18.1                    | At1g53050.1 | UNKN       | no    | cell division-related protein -related similar to GB:CAB89490 from [Beta vulgaris]                   |
| MGNKTSRKSKEKSGRNYTTELRSYE                    | 9.5                     | At4g34330.1 | UNKN       | no    | conserved hypothetical common family with hypothetical protein F10M10_90, Arabidopsis thaliana; simi |
| MGACASKPKESDIVEGSVSTENAVV                    | 17.3                    | At4g27580.1 | UNKN       | no    | expressed protein                                                                                    |
| MGASNVRSKSRKLV SPEQVGNRNSK                   | 4.4                     | At5g11530.1 | UNKN       | no    | expressed protein                                                                                    |

| Sequence (Arabidopsis predict myristoylated) | HM <sub>266</sub> Score | ID          | function | train | description       |
|----------------------------------------------|-------------------------|-------------|----------|-------|-------------------|
| MGASSSTDDKESSEKREIESLAAST                    | 5.0                     | At5g39590.1 | UNKN     | no    | expressed protein |
| MGCAGSTQSQADGSVKIRKPKPWK                     | 14.2                    | At1g53400.1 | UNKN     | no    | expressed protein |
| MGCAQSTIAVVGRKNKRIIQESVV                     | 2.1                     | At5g14020.1 | UNKN     | no    | expressed protein |
| MGCASSKHRKRCLHCRRGYSPVDV                     | 16.3                    | At3g28850.1 | UNKN     | no    | expressed protein |
| MGCASSKNRNRNCRNCKGGLSPVIVP                   | 9.7                     | At5g39865.1 | UNKN     | no    | expressed protein |
| MGCFASRPNDTGGNRRKPTSIGDVS                    | 13.3                    | At1g73390.1 | UNKN     | no    | expressed protein |
| MGCFMGCFLSSNKKRRNSIRKILP                     | 6.4                     | At2g33400.1 | UNKN     | no    | expressed protein |
| MGCCGSRLLGGVATTRAEEGGVVPLP                   | 5.7                     | At5g50830.1 | UNKN     | no    | expressed protein |
| MGGCASKPKESDIPETEKTVVESKN                    | 18.3                    | At5g54095.1 | UNKN     | no    | expressed protein |
| MGGCASRPKESDMQNEEGSVNPKPV                    | 18.2                    | At3g49540.1 | UNKN     | no    | expressed protein |
| MGGCTSKQERRGVRSVKETSQDQSR                    | 9.3                     | At3g23930.1 | UNKN     | no    | expressed protein |
| MGGCVSSQRKLSNKLQKKQKRGRS                     | 12.6                    | At1g13970.1 | UNKN     | no    | expressed protein |
| MGGCVSTHSKAIRPRRKGRRRSSKH                    | 18.1                    | At3g29180.1 | UNKN     | no    | expressed protein |
| MGGLCSRSSSVNNAPEGGTFAHVNGH                   | 6.4                     | At1g34320.1 | UNKN     | no    | expressed protein |
| MGGRGGGSTDYDDKVGRRKKEKER                     | 4.1                     | At1g32130.1 | UNKN     | no    | expressed protein |
| MGGSSSSSPTSSSSPAKRGKNKNG                     | 5.1                     | At4g28840.1 | UNKN     | no    | expressed protein |
| MGGVTSSIAAKFAFFPPTPPSYEVI                    | 1.8                     | At1g66900.1 | UNKN     | no    | expressed protein |
| MGISGSKRVTTILSNSPEFDSACDS                    | 1.6                     | At2g43540.1 | UNKN     | no    | expressed protein |
| MGITSSDTPKTETFSDPKSNNEEA                     | 3.4                     | At1g14060.1 | UNKN     | no    | expressed protein |
| MGLCVSVNRNEYVSSSTTAKIVTIN                    | 1.3                     | At1g76600.1 | UNKN     | no    | expressed protein |
| MGLFSSSSGDLRYKFQVCHENQVKS                    | 1.0                     | At2g24240.1 | UNKN     | no    | expressed protein |
| MGNACCVAARDKMVVPNSSAGENLQ                    | 5.5                     | At4g39140.2 | UNKN     | no    | expressed protein |
| MGNACCVATRDKMVVPNTSAVENFQ                    | 5.1                     | At2g21500.2 | UNKN     | no    | expressed protein |
| MGNALVKKEPPPVLVPLFDYPP                       | 3.8                     | At3g27930.1 | UNKN     | no    | expressed protein |
| MGNCALKPKVLSETGAPAPEELKDS                    | 1.9                     | At4g39320.1 | UNKN     | no    | expressed protein |
| MGNCCVSSGTTDRENENVSDKNTTI                    | 17.0                    | At1g61170.1 | UNKN     | no    | expressed protein |
| MGNCLRHESEMHWAGEDWDEFITD                     | 1.9                     | At3g20340.1 | UNKN     | no    | expressed protein |
| MGNCLSTSDPSHEDVSKKLPKALPV                    | 13.0                    | At2g44260.2 | UNKN     | no    | expressed protein |
| MGNFLRRSCAVHPASGDGGRGRHVD                    | 2.1                     | At3g61930.1 | UNKN     | no    | expressed protein |
| MGNIGIGLSKCLTGGAGRNKKPELS                    | 8.5                     | At2g28890.1 | UNKN     | no    | expressed protein |
| MNGTSTRVVGCFVPSNDKNGVDLEF                    | 6.9                     | At2g46920.2 | UNKN     | no    | expressed protein |
| MNGVTKLSICFTGGGERLRPKDI                      | 7.5                     | At1g07630.1 | UNKN     | no    | expressed protein |
| MGNLFVKKPQITEVDRAILSLKTQR                    | 0.8                     | At5g63880.1 | UNKN     | no    | expressed protein |
| MGNSSAQSSTPSLPIDSTFNLPS                      | 5.3                     | At2g44230.1 | UNKN     | no    | expressed protein |
| MGNSVRSNLRDIRGRSMDPRMWHK                     | 7.2                     | At2g04900.1 | UNKN     | no    | expressed protein |

| Sequence (Arabidopsis predict myristoylated) | HM <sub>266</sub> Score | ID          | function | train | description                                                                                       |
|----------------------------------------------|-------------------------|-------------|----------|-------|---------------------------------------------------------------------------------------------------|
| MGNVYVSCALNKTSSSPLAKVILPDG                   | 1.4                     | At3g03280.1 | UNKN     | no    | expressed protein                                                                                 |
| MGNVYVSSALSKTSSSSSSAAKVILP                   | 7.9                     | At5g17350.1 | UNKN     | no    | expressed protein                                                                                 |
| MGRLSSSMKKIEKGLKNGNKYQDED                    | 1.3                     | At2g45740.2 | UNKN     | no    | expressed protein                                                                                 |
| MGSAGVASSSSDV AISALREKHEKE                   | 4.5                     | At4g14950.1 | UNKN     | no    | expressed protein                                                                                 |
| MGSCVSSSQSKSSASDSVVKLASF                     | 8.9                     | At3g01860.1 | UNKN     | no    | expressed protein                                                                                 |
| MGSCVVILSDGEVPVKADASTIAIS                    | 2.4                     | At2g22400.1 | UNKN     | no    | expressed protein                                                                                 |
| MGSFCCKSLGINFGSEYSGSSVADD                    | 11.6                    | At5g08660.1 | UNKN     | no    | expressed protein                                                                                 |
| MGSFHRRTFSYDKLPNEPILSVLK                     | 2.6                     | At5g25340.1 | UNKN     | no    | expressed protein                                                                                 |
| MGSLMSGWDSRVRDPKSVRRCKSLT                    | 1.0                     | At1g19530.1 | UNKN     | no    | expressed protein                                                                                 |
| MGSRLAESSTPMKACEEVGRPSFTS                    | 1.0                     | At1g06660.1 | UNKN     | no    | expressed protein                                                                                 |
| MGSSQSSQLLDEEEEEDEAESEGE                     | 3.8                     | At1g12850.1 | UNKN     | no    | expressed protein                                                                                 |
| MGSSVSKTASSASASSITSILNSPP                    | 8.9                     | At2g41330.1 | UNKN     | no    | expressed protein                                                                                 |
| MGSVCCVAAKDRNVPSGAIDNSVCS                    | 4.0                     | At1g19680.1 | UNKN     | no    | expressed protein                                                                                 |
| MGSVCCVAVKDRKVPSPGGPASSSV                    | 6.6                     | At1g75400.1 | UNKN     | no    | expressed protein                                                                                 |
| MGTCFSSSTKSTAEISPFDLVVKPP                    | 13.6                    | At3g54290.1 | UNKN     | no    | expressed protein                                                                                 |
| MGWNFSKAPDNSKAYQNLPADEAAI                    | 2.1                     | At3g22435.1 | UNKN     | no    | expressed protein                                                                                 |
| MGSGFSSLLPCFNQGHRNRRRHSSA                    | 10.2                    | At2g35350.1 | UNKN     | no    | expressed protein and genefinder                                                                  |
| MGGVTSSVAAKFAFFPPSPSSYKLV                    | 3.1                     | At5g14390.1 | UNKN     | no    | expressed protein CGI-67, Homo sapiens, EMBL:AF151825                                             |
| MGISLSKRRRDNNNNHHHPHNPPY                     | 7.9                     | At5g19080.1 | UNKN     | no    | expressed protein Common family members At5g03200, At3g09770 [Arabidopsis thaliana]               |
| MGGVPSTPRKTGGDDVSVAEYLIAT                    | 1.0                     | At1g04200.1 | UNKN     | no    | expressed protein Contains similarity to gb Z69902 from C. elegans                                |
| MGFTVVSRSGSPTRRENQKRRVCFR                    | 1.3                     | At1g79950.1 | UNKN     | no    | expressed protein contains similarity to helicase-like protein NHL GI:6969265 from (Homo sapiens) |
| MGGCVSTPKSCVGGKIRSSKRRKTR                    | 17.3                    | At1g59650.1 | UNKN     | no    | expressed protein CW14 annotation temporarily based on supporting cDNA gi 6520232 dbj AB028233.1  |
| MGGCVGCYREHRSTAASLKDPPSNS                    | 2.3                     | At1g15350.2 | UNKN     | no    | expressed protein ESTs gb R65145, gb N96612 and gb R90096 come from this gene                     |
| MGGVCSCVFKDDDKKKLRNDDDK                      | 14.4                    | At1g30755.1 | UNKN     | no    | expressed protein ESTs gb T43746 and gb AA721821 come from this gene.                             |
| MGSSASKTASSVSSASSSSAFSPPP                    | 8.2                     | At3g57070.1 | UNKN     | no    | expressed protein hypothetical protein At2g41330 - Arabidopsis thaliana, EMBL:AC005662            |
| MGNVISGGSRPENHRDRTSPYPNP                     | 15.0                    | At3g53410.1 | UNKN     | no    | expressed protein KIAA0544 protein, Homo sapiens, EMBL:AB011116                                   |

| Sequence (Arabidopsis predict myristoylated) | HM <sub>266</sub> Score | ID          | function | train | description                                                                                          |
|----------------------------------------------|-------------------------|-------------|----------|-------|------------------------------------------------------------------------------------------------------|
| MGSLSEEDDEVSSERCGSYSPSAD                     | 3.4                     | At4g38430.1 | UNKN     | no    | expressed protein other predicted proteins Arabidopsis thaliana                                      |
| MGGSASLQSDSMEAAAAADSSIPRD                    | 4.5                     | At3g62970.1 | UNKN     | no    | expressed protein PGP237-11, Petunia x hybrida, EMBL:AF049930                                        |
| MGGSTSKDERNSSKRRRIKVKANEQR                   | 1.7                     | At4g13540.1 | UNKN     | no    | expressed protein predicted protein, Arabidopsis thaliana                                            |
| MGLFSSSSGELRYKFQVSHDNQVKS                    | 0.8                     | At4g30940.1 | UNKN     | no    | expressed protein predicted protein, Caenorhabditis elegans, PID:G1707206                            |
| MGGVTSSIAAKFAFFPPSPSYGFV                     | 3.8                     | At5g38220.1 | UNKN     | no    | expressed protein predicted proteins, Arabidopsis thaliana                                           |
| MGGSYSGSASMAFEYHETRAPVTES                    | 9.6                     | At4g02880.1 | UNKN     | no    | expressed protein similar to A. thaliana hypothetical protein F15K9.11, GenBank accession number AC0 |
| MGGCVSTPKSCVGAKLRRSSKRRKSR                   | 16.6                    | At1g10410.1 | UNKN     | no    | expressed protein similar to ESTs gb N96021 and gb N96863                                            |
| MGCGGSKVDNQPIVILCRERKELLK                    | 5.6                     | At1g77500.1 | UNKN     | no    | expressed protein similar to GB:AAD41429                                                             |
| MGCMFSLAAKFAFFPPSPPTYHLT                     | 1.6                     | At1g32190.1 | UNKN     | no    | expressed protein similar to hypothetical protein GB:AAD18105 GI:4337191 from [Arabidopsis thaliana] |
| MGGCVSSNLLTPTDDSSFSLTSSS                     | 14.1                    | At1g32760.1 | UNKN     | no    | expressed protein similar to hypothetical protein GB:AAF25972 GI:6714276 from [Arabidopsis thaliana] |
| MGNLFCCVLVKQSDVAVKERFGKFQ                    | 0.6                     | At3g01290.1 | UNKN     | no    | expressed protein similar to hypothetical protein GB:CAA10289 (Cicer arietinum)                      |
| MGGVTSSVAAKFAFFPPSPSYKVV                     | 3.3                     | At3g01690.1 | UNKN     | no    | expressed protein similar to putative protein GB:CAA22987 [Arabidopsis thaliana]                     |
| MGRRSSGGRSAPRPRPAAARSPAPQ                    | 0.8                     | At5g64400.1 | UNKN     | no    | expressed protein similar to unknown protein (emb CAB89373.1)                                        |
| MGCLLGCFGRRKNRRRQRRRESFQP                    | 7.2                     | At5g44040.1 | UNKN     | no    | expressed protein similar to unknown protein (gb AAD10667.1)                                         |
| MGRASSLSPGHRHFAGQANELITE                     | 0.7                     | At5g47380.1 | UNKN     | no    | expressed protein similar to unknown protein (pir T02421)                                            |
| MGACASRESLRSDSAKLILLDGTLLQ                   | 4.5                     | At5g66580.1 | UNKN     | no    | expressed protein similar to unknown protein (pir T08401)                                            |
| MGLFLVLPDHNNDSSSYSPAKT                       | 1.1                     | At5g52500.1 | UNKN     | no    | expressed protein strong similarity to unknown protein (emb CAB68146.1)                              |

| Sequence (Arabidopsis predict myristoylated) | HM <sub>266</sub> Score | ID          | function | train | description                                                                                          |
|----------------------------------------------|-------------------------|-------------|----------|-------|------------------------------------------------------------------------------------------------------|
| MGACASRESRRRTETAKLILPDGTLQ                   | 4.7                     | At3g50800.1 | UNKN     | no    | expressed protein unknown protein F27L4.13 Arabidopsis thaliana chromosome II BAC F27L4, PID:g315261 |
| MGCAQSRVDNEEAVARCKERRNVIK                    | 11.1                    | At5g25590.1 | UNKN     | no    | expressed protein various predicted proteins, Arabidopsis thaliana                                   |
| MGAVALHFATSCALNHYTINPRVV                     | 1.3                     | At1g52460.1 | UNKN     | no    | hypothetical protein                                                                                 |
| MGASCSAPVSSTIKKNWRDHPSS                      | 5.1                     | At1g69650.1 | UNKN     | no    | hypothetical protein                                                                                 |
| MGASDSTLLGSQENRGDVITTISHR                    | 0.8                     | At5g66290.1 | UNKN     | no    | hypothetical protein                                                                                 |
| MGCCFSAGKVTAPPVAAAQIPPPLE                    | 14.7                    | At4g28180.1 | UNKN     | no    | hypothetical protein                                                                                 |
| MGCCISKCSPKSKDFKEAEEPHEKY                    | 15.7                    | At1g21510.1 | UNKN     | no    | hypothetical protein                                                                                 |
| MGCCLSKKPSPLPSSVKPSDPIKP                     | 17.2                    | At1g65710.1 | UNKN     | no    | hypothetical protein                                                                                 |
| MGCFASTPKDSGGNRRKPTSIGEVS                    | 13.3                    | At1g17940.1 | UNKN     | no    | hypothetical protein                                                                                 |
| MGCLFGCFRAKDDESTTDSVSQAKH                    | 6.7                     | At2g30820.1 | UNKN     | no    | hypothetical protein                                                                                 |
| MGCSPSKLDGLPAVSLCRDRCSSE                     | 3.4                     | At1g20530.1 | UNKN     | no    | hypothetical protein                                                                                 |
| MGCSSRTIAEGKKEKIRRPKTWKH                     | 4.9                     | At1g16960.1 | UNKN     | no    | hypothetical protein                                                                                 |
| MGGGGGSVSNANGGVPASSRKVIQD                    | 1.2                     | At4g18150.1 | UNKN     | no    | hypothetical protein                                                                                 |
| MGIVASKGDSNTPLLNLCKERKELI                    | 3.0                     | At5g54480.1 | UNKN     | no    | hypothetical protein                                                                                 |
| MGNVICVTEKTTTSWSGDDNGSYNK                    | 8.2                     | At4g21920.1 | UNKN     | no    | hypothetical protein                                                                                 |
| MGNCLRHDNGVARKEKDDLDPEPLV                    | 1.3                     | At3g21680.1 | UNKN     | no    | hypothetical protein                                                                                 |
| MGNSLGTTKTATIMNINGESFKLKT                    | 1.3                     | At1g71015.1 | UNKN     | no    | hypothetical protein                                                                                 |
| MGNTSSCAPLIISTNSSSGVVKILA                    | 2.3                     | At1g18290.1 | UNKN     | no    | hypothetical protein                                                                                 |
| MGNVTSNMAAKFAFFPPPPTYDVGK                    | 2.1                     | At2g24320.1 | UNKN     | no    | hypothetical protein                                                                                 |
| MGSYARQVREDPNWSGSGSRRYSG                     | 6.6                     | At2g19090.1 | UNKN     | no    | hypothetical protein                                                                                 |
| MGTCMSTHSRRLRPRRKGRRRFSKN                    | 13.0                    | At5g39430.1 | UNKN     | no    | hypothetical protein                                                                                 |
| MGCVSSNLLNHDEDFSQIGGGSSAF                    | 8.5                     | At4g10630.1 | UNKN     | no    | hypothetical protein Arabidopsis thaliana chromosome II BAC F13H10.12,PID:g3894191                   |
| MGNQTSKKSQETSASVHYTTELRS                     | 4.0                     | At4g34320.1 | UNKN     | no    | hypothetical protein common family with F10M10_100, Arabidopsis thaliana; similar to At14a, GI:11994 |
| MGASGRWIKALVGFTKSDKSRSSKK                    | 1.2                     | At3g22190.1 | UNKN     | no    | hypothetical protein contains PF00612 IQ:IQ calmodulin-binding motif                                 |
| MGAVTSSMAAKFAFFPPNPPSYGVE                    | 0.9                     | At3g30380.1 | UNKN     | no    | hypothetical protein contains Pfam profile: PF00561 alpha/beta hydrolase fold                        |
| MGISSRILKPEYRSQYNNQIPMQE                     | 1.6                     | At5g02210.1 | UNKN     | no    | hypothetical protein hypothetical protein F7A19.14 - Arabidopsis thaliana, EMBL:EMBL:AC007576        |



| Sequence (Arabidopsis predict myristoylated) | HM <sub>266</sub> Score | ID          | function  | train | description                                                                                             |
|----------------------------------------------|-------------------------|-------------|-----------|-------|---------------------------------------------------------------------------------------------------------|
| MGGFLVLNSSNNVVRTVPSKCRKHP                    | 5.1                     | At5g20440.1 | UNKN      | no    | hypothetical protein probable mitosis and maintenance of ploidy protein, Schizosaccharomyces pombe,     |
| MGVSFSCPFAEQDDVEAALDSVTVK                    | 8.0                     | At3g13600.1 | UNKN      | no    | hypothetical protein similar to hypothetical protein GB:CAB68186 GI:6735365 from [Arabidopsis thaliana] |
| MGNKDSKGSSSSTNPKEEIAAVPQP                    | 11.1                    | At5g06010.1 | UNKN      | no    | hypothetical protein similar to unknown protein (gb AAF04428.1)                                         |
| MGNNGVASFSGCCAGTTAGEISGRYV                   | 3.9                     | At3g09400.1 | UNKN      | no    | hypothetical protein similar to unknown protein GB:AAC79593 [Arabidopsis thaliana]                      |
| MGNLNVKKPKITEVDRAILSLKTQR                    | 1.8                     | At5g09260.1 | UNKN      | no    | hypothetical protein SNF7 protein - Saccharomyces cerevisiae, PIR:S52590                                |
| MGCCASNTAGGSKANRISRWRSTGI                    | 8.0                     | At5g07910.1 | UNKN      | no    | leucine rich repeat protein family contains leucine rich repeat (LRR) domains, Pfam:PF00560             |
| MGGLISLQSLDMSSNSLSGPLPKSL                    | 1.7                     | At4g20940.1 | UNKN      | no    | leucine rich repeat protein family contains leucine rich-repeat (LRR) domains Pfam:PF00560, INTERPRO    |
| MGCCQSRIDSKEIVSRCKARKRYLK                    | 15.6                    | At3g51290.1 | UNKN      | no    | proline-rich protein family                                                                             |
| MGCAASRIDNEEKVLVCRQRKRLMK                    | 9.0                     | At2g34670.1 | UNKN      | no    | proline-rich protein family contains proline-rich region, INTERPRO:IPR000694                            |
| MGCCLSKNPPQASSSLIDGSCSVK                     | 14.0                    | At5g37010.1 | UNKN      | no    | serine-rich protein -related hypothetical protein F1E22.8 - Arabidopsis thaliana, EMBL:AC007234         |
| MGGSSGGGVSYRSGGESDVELEDYE                    | 2.9                     | At3g02850.1 | UNKN      | no    |                                                                                                         |
| MGCCCCLPISIPESRTIDEHLPLSR                    | 8.9                     | At4g23450.1 | UNKN-ZINC | no    | C3HC4-type zinc finger protein family contains Pfam profile: PF00097 zinc finger, C3HC4 type            |
| MGCVSSCFGVDDFEDYPNPSSSVNR                    | 8.1                     | At5g15790.1 | UNKN-ZINC | no    | C3HC4-type zinc finger protein family contains Pfam profile: PF00097 zinc finger, C3HC4 type (RING f)   |
| MGGCCCCSSRRADV DNGPAYYYYYP                   | 17.5                    | At5g41350.1 | UNKN-ZINC | no    | C3HC4-type zinc finger protein family contains Pfam profile: PF00097 zinc finger, C3HC4 type (RING f)   |
| MGGCCSSSRKSHLVGTPVYYYYCPES                   | 15.9                    | At4g00335.1 | UNKN-ZINC | no    | C3HC4-type zinc finger protein family contains Pfam profile: PF00097 zinc finger, C3HC4 type (RING f)   |
| MGSGRSKSCLGSSAMAREASDVAQP                    | 0.8                     | At5g45290.1 | UNKN-ZINC | no    | C3HC4-type zinc finger protein family contains Pfam profile: PF00097 zinc finger, C3HC4 type (RING f)   |

| Sequence (Arabidopsis predict myristoylated) | HM <sub>266</sub> Score | ID          | function  | train | description                                                                                                          |
|----------------------------------------------|-------------------------|-------------|-----------|-------|----------------------------------------------------------------------------------------------------------------------|
| MGCVSSCFRVEDIDEYMNPNSSVYR                    | 4.4                     | At3g02290.1 | UNKN-ZINC | no    | C3HC4-type zinc finger protein family contains zinc finger motif, C3HC4 type (RING finger)                           |
| MGLNHGVGLNNNNNNGGFNGISTGG                    | 1.8                     | At5g62940.1 | UNKN-ZINC | no    | Dof zinc finger protein Dof zinc finger protein, <i>Oryza sativa</i> , EMBL:AB028129                                 |
| MGNISSSGEGRRRRRRRNHTAAPP                     | 5.7                     | At3g09770.2 | UNKN-ZINC | no    | putative RING zinc finger protein annotation temporarily based on supporting cDNA <a href="#">gi 18377643 gb AY0</a> |
| MGQSMSCGSRPEHGIFASVQCGDII                    | 5.2                     | At2g28840.1 | UNKN-ZINC | no    | RING zinc finger ankyrin protein -related                                                                            |
| MGISFSNNRRRDNNRRHLHHYPP                      | 7.7                     | At3g06140.1 | UNKN-ZINC | no    | RING zinc finger protein -related contains Pfam profile: PF00097 Zinc finger, C3HC4 type (RING finge                 |
| MGFLSSSTRKEAKTTRPNKAHPST                     | 0.7                     | At2g41835.1 | UNKN-ZINC | no    | zinc finger protein (PMZ) -related temporary automated functional assignment                                         |

**Supplementary Table 5.** Non-Arabidopsis plant proteins predicted to contain N-terminal myristoylation sites.

| Sequence (non AT predict myrist) | HMM <sub>266</sub> Score | ID                                   | Description                                                                           |
|----------------------------------|--------------------------|--------------------------------------|---------------------------------------------------------------------------------------|
| MGLCFSSAAKSSGHNRSSRNPHPHP        | 19.2                     | gi 15227920 ref NP_179379.1          |                                                                                       |
| MGVCFSKASKPSGNGYQPPPPQPYK        | 18.3                     | gi 28866604 emb CAD70165.1           | calcium-dependent protein kinase [Spirodela punctata]                                 |
| MGHCCSKGVTADNDGHVVSVVDGNS        | 17.8                     | gi 16904222 gb AAL30818.1 AF435450_1 | calcium/calmodulin-dependent protein kinase CaMK1 [Nicotiana tabacum]                 |
| MGCVHGRPSTSSPAAANASRRRDHP        | 17.5                     | gi 23495876 dbj BAC20085.1           | putative CRK1 protein(cdc2-related kinase 1) [Oryza sativa (japonica cultivar-group)] |
| MGNCCVTPEGSRGRKKQQEQKQK          | 17.0                     | gi 34393291 dbj BAC83205.1           | putative calcium-dependent protein kinase [Oryza sativa (japonica cultivar-group)]    |
| MGSCSRATSPDSGRGGANGYGYSH         | 16.8                     | gi 23616997 dbj BAC20693.1           | CDP2_ORYSA Calcium-dependent protein kinase [Oryza sativa (japonica cultivar-group)]  |
| MGACASRPKDLDRDLAPAPVPAEES        | 16.0                     | gi 5360192 gb AAD42902.1 AF161330_1  | unknown [Solanum chacoense]                                                           |
| MGCCFSVIDDDGYEHDDAVSGSVNE        | 15.9                     | gi 32488315 emb CAE02892.1           | OSJNBa0015K02.9 [Oryza sativa (japonica cultivar-group)]                              |
| MGGCFSKKYTQQDANGHRAGRRVNQ        | 15.4                     | gi 19171502 emb CAC87494.1           | calcium-dependent protein kinase [Lycopersicon esculentum]                            |
| MGACASRPKDLKDLAPAPVPAEDA         | 15.3                     | gi 6019472 gb AAD02545.2             | PGPS/D3 [Petunia x hybrida]                                                           |
| MGACFSSHTATAAADGGSGKRQQRK        | 15.2                     | gi 6689920 gb AAF23900.1 AF194413_1  | calcium-dependent protein kinase [Oryza sativa]                                       |
| MGCSSSVPARSTGGLNNSNDNSAT         | 15.0                     | gi 5931625 dbj BAA84717.1            | rab5B [Oryza sativa (japonica cultivar-group)]                                        |
| MGSCLAKPAESAEQKKASSVPSPPP        | 15.0                     | gi 33591148 gb AAQ23078.1            | gliding motility related CaM kinase [Chlamydomonas reinhardtii]                       |
| MGQCCSRAPAPDSGRGGTNGYGYSN        | 15.0                     | gi 7428011 pir  T02993               | calcium-dependent protein kinase (EC 2.7.1.-) 9 - maize                               |
| MGNCCVTPPQTGSPLKNKKNKPNPF        | 14.9                     | gi 2665890 gb AAB88537.1             | calcium-dependent protein kinase [Fragaria x ananassa]                                |
| MGGCHAKPLTHEEADGACSPRERP         | 14.9                     | gi 33146627 dbj BAC79915.1           | putative CDPK-related protein kinase [Oryza sativa (japonica cultivar-group)]         |
| MGICASKGKPNANNGHHGSGSGGV         | 14.9                     | gi 14029712 gb AAK52801.1 AF363784_1 | calcium-dependent protein kinase CDPK1 [Lycopersicon esculentum]                      |
| MGCVFGRPSSPPAAAARKGRRKKR         | 14.8                     | gi 15528679 dbj BAB64745.1           | putative CRK1 protein [Oryza sativa (japonica cultivar-group)]                        |
| MGASCSSPFPSPPAESNAPSASA          | 14.6                     | gi 20146453 dbj BAB89233.1           | pectate lyase-like protein [Oryza sativa (japonica cultivar-group)]                   |
| MGICVSKPSPEPDLHNHHTSIPVND        | 14.5                     | gi 1706130 sp P53681 CRK_DAUCA       | CDPK-related protein kinase (PK421)                                                   |

| Sequence (non AT predict myrist) | HMM <sub>266</sub> Score | ID                                   | Description                                                                                        |
|----------------------------------|--------------------------|--------------------------------------|----------------------------------------------------------------------------------------------------|
| MGVCLSKSKPAESKSDGHYRSGGSD        | 14.3                     | gi 10568116 gb AAD28192.2            | calcium-dependent protein kinase [Solanum tuberosum]                                               |
| MGSCVVKERSDEEDKIDFKGGNVHV        | 14.3                     | gi 20804820 dbj BAB92503.1           | thioredoxin-like protein [Oryza sativa (japonica cultivar-group)]                                  |
| MGNCFSQSTQTRGSKRNQKPDPLDE        | 14.3                     | gi 28866606 emb CAD70166.1           | putative calcium-dependent protein kinase [Spirodela punctata]                                     |
| MGCGLSREKDAGGGPRRRPGSVGDV        | 14.1                     | gi 32487665 emb CAE05655.1           | OSJNBa0038O10.21x [Oryza sativa (japonica cultivar-group)]                                         |
| MGSCFSSEGGNESRKESAERPQITP        | 14.0                     | gi 24796805 gb AAN64481.1            | putative protein kinase [Oryza sativa (japonica cultivar-group)]                                   |
| MGGCFSKKYRQEGANGGYRATRRNA        | 13.9                     | gi 7428009 pir  T01989               | calcium-dependent protein kinase (EC 2.7.1.-) 1 - common tobacco                                   |
| MGACLSSSSVIDAKDQKPSSAYVIS        | 13.9                     | gi 13699079 dbj BAB41200.1           | TMV response-related gene product [Nicotiana tabacum]                                              |
| MGCCGSSLRVGSHAPEKPPRRARPP        | 13.9                     | gi 31433335 gb AAP54864.1            | protein kinase-like protein [Oryza sativa (japonica cultivar-group)]                               |
| MGCVFGKESLAPEGRERGGREKEN         | 13.9                     | gi 7688002 emb CAB89665.1            | CRK1 protein [Beta vulgaris subsp. vulgaris]                                                       |
| MGLCSSSARRDAGTPGGGNGAGNK         | 13.8                     | gi 12592069 gb AAF23901.2 AF194414_1 | calcium-dependent protein kinase [Oryza sativa]                                                    |
| MGICASKNKATQPEDNGYTPANGVG        | 13.8                     | gi 4336426 gb AAD17800.1             |                                                                                                    |
| MGGCFSKKEYQADNGYRSAPTAYH         | 13.6                     | gi 7434365 pir  T14335               | protein kinase, calcium-dependent (EC 2.7.1.-) - carrot                                            |
| MGCLLSKDKDSEQEHNNGGYRYAES        | 13.6                     | gi 13561063 emb CAA65500.1           | protein kinase [Medicago sativa]                                                                   |
| MGTNYSKPTTSINDASNLSNRVPFE        | 13.6                     | gi 8547236 gb AAF76311.1 AF220603_3  | LescPth2 [Lycopersicon esculentum]                                                                 |
| MGCAGSTPKTDDNSKCLKPKPWKH         | 13.6                     | gi 15289832 dbj BAB63530.1           | P0435H01.26 [Oryza sativa (japonica cultivar-group)]                                               |
| MGLCHGKPSQIPEPEAEAEAAAAGV        | 13.5                     | gi 23237898 dbj BAC16472.1           | putative calcium/calmodulin-dependent protein kinase CaMK [Oryza sativa (japonica cultivar-group)] |
| MGSCFSSSKVSGSNSNTPSTNNTAT        | 13.4                     | gi 3779218 gb AAC78558.1             | protein kinase CPK1 [Solanum tuberosum]                                                            |
| MGQCCSKGVSGENGGSVVAIGDGNS        | 13.3                     | gi 19547871 gb AAL87457.1            | serine/threonine protein kinase pk23 [Lycopersicon esculentum]                                     |
| MGCTASKVEQEDTVRRCKERRRHMK        | 13.2                     | gi 31433523 gb AAP55028.1            | putative leucine zipper protein [Oryza sativa (japonica cultivar-group)]                           |
| MGTNYSKPTTSINDASNLNRNRPFE        | 13.1                     | gi 13021867 gb AAK11569.1 AF318493_1 | Pto-like protein kinase D [Lycopersicon hirsutum]                                                  |
| MGNVCVGGHSDRKNALNPNEPAATNV       | 12.9                     | gi 5162878 dbj BAA81749.1            | calcium-dependent protein kinase [Marchantia polymorpha]                                           |

| Sequence (non AT predict myrist) | HMM <sub>266</sub> Score | ID                                   | Description                                                                                   |
|----------------------------------|--------------------------|--------------------------------------|-----------------------------------------------------------------------------------------------|
| MGCVSSKILSKSGSFQEKVVSHGFK        | 12.8                     | gi 5257280 dbj BAA81779.1            | Similar to neurofilament triplet M protein. (P07197) [Oryza sativa (japonica cultivar-group)] |
| MGGLCSKGS AVDKSPSDTTLGPDRV       | 12.8                     | gi 20146508 dbj BAB89287.1           | P0491F11.23 [Oryza sativa (japonica cultivar-group)]                                          |
| MGCGSSLPDRDSRPFGRDNPENGGG        | 12.8                     | gi 1370180 emb CAA98167.1            | RAB5B [Lotus corniculatus var. japonicus]                                                     |
| MGNCVGASNRSTSRENKGNHRVSRR        | 12.7                     | gi 31415931 gb AAP50952.1            | hypothetical protein [Oryza sativa (japonica cultivar-group)]                                 |
| MGNCCRSPAAAAREVDKSSHFPASA        | 12.7                     | gi 20805246 dbj BAB92912.1           | putative calcium-dependent protein kinase [Oryza sativa (japonica cultivar-group)]            |
| MGLCFSKKQVRRRREEQQPPCHE          | 12.5                     | gi 32483146 emb CAE02138.1           | OSJNBa0074L08.6 [Oryza sativa (japonica cultivar-group)]                                      |
| MGGAFSTSKPKPAAGEEGGESAVVA        | 12.3                     | gi 34394553 dbj BAC83857.1           | putative thioredoxin [Oryza sativa (japonica cultivar-group)]                                 |
| MGNCVARSGTAVDAGDGGEDGKRR         | 12.3                     | gi 33146759 dbj BAC79670.1           | putative protein phosphatase 2C [Oryza sativa (japonica cultivar-group)]                      |
| MGCFQSKSRPFPGHEDPVLLASQT         | 12.3                     | gi 27650414 emb CAD33259.1           | calcineurin B [Crocus sativus]                                                                |
| MGCFLSKPAGAGPLPPNDAAALPAD        | 12.3                     | gi 31433613 gb AAP55105.1            | putative protein kinase [Oryza sativa (japonica cultivar-group)]                              |
| MGSKYSKATNSINDASNSSYRVPFE        | 12.2                     | gi 16326617 gb AAL17825.1            | Pto-like protein [Solanum nigrum]                                                             |
| MGNAGSSPEQAAGNNKEDAEARRQP        | 12.2                     | gi 18844859 dbj BAB85328.1           | OJ1656_A11.17 [Oryza sativa (japonica cultivar-group)]                                        |
| MGQCYGKARGASSRADHDADPSGAG        | 12.0                     | gi 7446432 pir  T02033               | calcium/calmodulin-dependent protein kinase homolog - maize                                   |
| MGNANGREDGAIPDAGDPSGREPHA        | 11.7                     | gi 32364486 gb AAO61676.1            | AKIN beta1 [Medicago truncatula]                                                              |
| MGSSCSRPHSVNEAEAAGNTRSADI        | 11.5                     | gi 11245655 gb AAF71788.2 AF267485_1 | G protein alpha subunit [Hordeum vulgare]                                                     |
| MGLLCSKHQHSTKPDENAQATGIE         | 11.4                     | gi 7441569 pir  T09152               | GTP-binding regulatory protein alpha chain - spinach                                          |
| MGGCAGKVRRDDEEKLDKFGGNVHI        | 11.4                     | gi 24637227 gb AAN63617.1 AF435816_1 | thioredoxin h-like protein [Zea mays]                                                         |
| MGSSCSRPHSVNEAEAADNTRSADI        | 11.4                     | gi 22336032 dbj BAC10501.1           | G protein alpha subunit [Triticum aestivum]                                                   |
| MGLLCSKNRRYNDADTEENTQTAEI        | 11.3                     | gi 1346103 sp P49082 GBA1_LOTJA      | Guanine nucleotide-binding protein alpha-1 subunit (GP-alpha-1)                               |
| MGLLCSRNKGYNQADDEENTQTADI        | 11.1                     | gi 18369796 dbj BAB84093.1           | heterotrimeric GTP binding protein alpha subunit [Nicotiana tabacum]                          |
| MGNCCGWGARIKDGSPQPGASGMFS        | 11.1                     | gi 27545044 gb AAO18450.1            | putative protein kinase [Oryza sativa (japonica cultivar-group)]                              |
| MGCVASKNAVSVTPAADSSGALRER        | 11.1                     | gi 33146814 dbj BAC79804.1           | putative cyclin-dependent kinase CDC2C [Oryza sativa (japonica cultivar-group)]               |

| Sequence (non AT predict myrist) | HMM <sub>266</sub> Score | ID                                  | Description                                                                                                |
|----------------------------------|--------------------------|-------------------------------------|------------------------------------------------------------------------------------------------------------|
| MGASGSKPEGAGPGPALPTPSPAPP        | 11.0                     | gi 9022433 gb AAF82382.1 AF280543_1 | putative copper chaperone Cox17 [Chlamydomonas reinhardtii]                                                |
| MGSLCSRKNHYSQADDEENTQTAEI        | 11.0                     | gi 3913725 sp P93564 GBA1_SOLTU     | Guanine nucleotide-binding protein alpha-1 subunit (GP-alpha-1)                                            |
| MGNACRGSFRAKTFQGSYPQNHSTS        | 10.9                     | gi 31616519 gb AAP55748.1           | calcium-dependent protein kinase 3 [Capsicum annuum]                                                       |
| MGNRTSRHKHGEKHRSEAGSHQTHI        | 10.9                     | gi 7434369 pir  T10938              | calcium-dependent protein kinase (EC 2.7.1.-) - sweet potato                                               |
| MGSKYSKATNSISDASNSRYGVPFE        | 10.8                     | gi 8547235 gb AAF76310.1 AF220603_2 | LescPth3 [Lycopersicon esculentum]                                                                         |
| MGNCFGSEEAEEAAATVRAPAQGHG        | 10.7                     | gi 32488580 emb CAE03088.1          | OSJNBa0017B10.3 [Oryza sativa (japonica cultivar-group)]                                                   |
| MGAGTSKNSDSTSHGDGDGEERDEY        | 10.6                     | gi 7484665 pir  T08994              | 6-phosphofructo-2-kinase (EC 2.7.1.105) / fructose-2, 6-bisphosphate 2-phosphatase (EC 3.1.3.46) - spinach |
| MGNAAAVPSSCASADAAPSTTPTIK        | 10.6                     | gi 13872953 dbj BAB44058.1          | P0030H07.22 [Oryza sativa (japonica cultivar-group)]                                                       |
| MGLLCSKSNRYNDAKAEENAQTAEI        | 10.5                     | gi 3913708 sp O04278 GBA1_PEA       | Guanine nucleotide-binding protein alpha-1 subunit (GP-alpha-1)                                            |
| MGSKYSKATNSINDASNLSYGVPFE        | 10.4                     | gi 8547231 gb AAF76307.1            | Fen kinase [Lycopersicon pimpinellifolium]                                                                 |
| MGGCVGKGRSIVEEKLDKFGGNVHV        | 10.3                     | gi 27543511 gb AAO16555.1           | thioredoxin h [Leymus chinensis]                                                                           |
| MGACNSCEATAVAAVNGRSASGEAT        | 10.2                     | gi 31126784 gb AAP44703.1           | hypothetical protein [Oryza sativa (japonica cultivar-group)]                                              |
| MGSKYSKATNSINDASNLSYGIPFE        | 10.1                     | gi 8547239 gb AAF76314.1            | Fen kinase [Lycopersicon esculentum]                                                                       |
| MGLLCSRNRRYNDADAEEENAQTAEI       | 10.1                     | gi 3913724 sp P93163 GBA2_SOYBN     | Guanine nucleotide-binding protein alpha-2 subunit (GP-alpha-2)                                            |
| MGLLCSRNRRYNDADAEEENAQAEEI       | 9.9                      | gi 3334195 sp Q40224 GBA1_LUPLU     | Guanine nucleotide-binding protein alpha-1 subunit (GP-alpha-1)                                            |
| MGLVCSRNRRYRDSDPREENAQAEEI       | 9.9                      | gi 3913709 sp O04279 GBA2_PEA       | Guanine nucleotide-binding protein alpha-2 subunit (GP-alpha-2)                                            |
| MGCGGSKEAVATGNTVGSTGGRSSR        | 9.8                      | gi 20160760 dbj BAB89701.1          | P0504E02.1 [Oryza sativa (japonica cultivar-group)]                                                        |
| MGANHSREDLELSDSESESEYGSSES       | 9.8                      | gi 7488984 pir  T07737              | dem protein - tomato                                                                                       |
| MGNANAREDGAAVDGDGDGEVSGRR        | 9.5                      | gi 5702015 emb CAB52141.1           | GAL83 protein [Solanum tuberosum]                                                                          |
| MGGCVGKDRSIVEDKLDKFGGNVHV        | 9.5                      | gi 11362710 pir  T50864             | thioredoxin-like protein [imported] - Hordeum bulbosum                                                     |
| MGQCYGKAGGASSRRADHDDAVAPP        | 9.3                      | gi 7446431 pir  T03023              | calcium-dependent protein kinase-related protein kinase - maize                                            |

| Sequence (non AT predict myrist) | HMM <sub>266</sub> Score | ID                         | Description                                                                          |
|----------------------------------|--------------------------|----------------------------|--------------------------------------------------------------------------------------|
| MGNTCRGSFKGNIFQGYSPEDSST         | 9.3                      | gi 20453013 gb AAL68971.1  | phloem calmodulin-like-domain protein kinase PCPK1 [Cucurbita maxima]                |
| MGNTCVGPSSAADRHGFFHSVSLAV        | 9.2                      | gi 33146743 dbj BAC79646.1 | putative calcium-dependent protein kinase 2 [Oryza sativa (japonica cultivar-group)] |
| MGAGVSGLFGLGGDEGETSAAVGGA        | 9.2                      | gi 31433129 gb AAP54682.1  | unknown protein [Oryza sativa (japonica cultivar-group)]                             |
| MGCGQSKIDQEEAVCRCDRRKLMMA        | 9.2                      | gi 15408647 dbj BAB64061.1 | putative bZIP (leucine zipper) protein [Oryza sativa (japonica cultivar-group)]      |
| MGNTCRGSFKGNIFQGYSPESST          | 9.1                      | gi 20453015 gb AAL68972.1  | calmodulin-like-domain protein kinase CPK2 [Cucurbita maxima]                        |
| MGCTNSTEARREMLADAGRATR           | 9.0                      | gi 32490043 emb CAE05962.1 | OSJNBa0063C18.3 [Oryza sativa (japonica cultivar-group)]                             |
| MGLVCSRNRRYRSDPGENAQA AEI        | 9.0                      | gi 22476942 gb AAM97352.1  | G protein alpha II subunit [Pisum sativum]                                           |
| MGCISKLLPPGPGDARGGSGARAT         | 9.0                      | gi 21741722 emb CAD40645.1 | OSJNBa0073L04.18 [Oryza sativa (japonica cultivar-group)]                            |
| MGGGQSRSPRDGSGHGRYGHSPSFQ        | 9.0                      | gi 20804929 dbj BAB92608.1 | P0456E05.7 [Oryza sativa (japonica cultivar-group)]                                  |
| MGGCVGKDRGIVEDKLDKGGNVHV         | 8.8                      | gi 11362711 pir T50862     | thioredoxin-like protein [imported] - Phalaris coerulescens                          |
| MGCAQSNEDGEGPVARCRERKHLR         | 8.7                      | gi 23237834 dbj BAC16409.1 | putative bZIP protein [Oryza sativa (japonica cultivar-group)]                       |
| MGSSCSRSHSLSEAETTKNAKSADI        | 8.7                      | gi 540533 dbj BAA07405.1   | G protein alpha subunit [Oryza sativa (japonica cultivar-group)]                     |
| MGASGSKLEKALGDQFPEGERYFGL        | 8.6                      | gi 21740732 emb CAD40853.1 | OSJNBa0086B14.25 [Oryza sativa (japonica cultivar-group)]                            |
| MGNRTSRHHRAAPEQPPQPKPKPQ         | 8.5                      | gi 12313676 dbj BAB21081.1 | putative calcium-dependent protein kinase [Oryza sativa (japonica cultivar-group)]   |
| MGNCSPPRRRGRPTSPSGSPPLDR         | 8.4                      | gi 20521256 dbj BAB91772.1 | P0679C12.24 [Oryza sativa (japonica cultivar-group)]                                 |
| MGALLSSPNSKNQPWEHGEASKADS        | 8.4                      | gi 31431565 gb AAP53323.1  | putative kelch-containing protein [Oryza sativa (japonica cultivar-group)]           |
| MGSGCASSPPTSPQPRHGRLVTVLS        | 8.4                      | gi 14346205 emb CAC41149.1 | unnamed protein product [Triticum aestivum]                                          |
| MGCFSCCGADDVGGKKKRDDPYVPI        | 8.3                      | gi 29027802 dbj BAC65877.1 | OSJNBa0011P19.1 [Oryza sativa (japonica cultivar-group)]                             |
| MGNNCVGPAAAGQNGFFANVALWRP        | 8.3                      | gi 27819504 gb AAO24908.1  | putative calcium-dependent protein kinase [Oryza sativa (japonica cultivar-group)]   |
| MGSKYSKATNSINDALNPSYLV PFE       | 8.3                      | gi 32330888 gb AAP79929.1  | Pto-like serine/threonine kinase [Capsicum annuum]                                   |

| Sequence (non AT predict myrist) | HMM <sub>266</sub> Score | ID                                    | Description                                                                               |
|----------------------------------|--------------------------|---------------------------------------|-------------------------------------------------------------------------------------------|
| MGGCVGKGRGVVEEKLDKFGGNVHV        | 8.2                      | gi 24637225 gb AAN63616.1 AF435815_1  | thioredoxin h-like protein [Hordeum vulgare subsp. vulgare]                               |
| MGGALSIVFGSGEDATAAGTESSEP        | 8.2                      | gi 1388078 gb AAC49353.1              | thioredoxin h                                                                             |
| MGSCASVHKDLGFPKKLFLASSPTK        | 8.2                      | gi 19386733 dbj BAB86115.1            | P0678F11.22 [Oryza sativa (japonica cultivar-group)]                                      |
| MGSKYSKATNSINDALNSSYLVPE         | 8.2                      | gi 32330884 gb AAP79927.1             | Pto-like serine/threonine kinase [Capsicum annuum]                                        |
| MGLCHGKSAAVLEPTVEEEEEGATR        | 8.0                      | gi 14133874 gb AAK54157.1 AF368282_1  | CaMK1 [Oryza sativa]                                                                      |
| MGGALSSVLGGDAAAAAASADDSSS        | 7.8                      | gi 33621080 gb AAQ23133.1             | thioredoxin H2 [Ipomoea batatas]                                                          |
| MGSFFSTMFTPPPAADDGGDSRVVA        | 7.8                      | gi 28209505 gb AAO37523.1             | putative thioredoxin [Oryza sativa (japonica cultivar-group)]                             |
| MGGCVGKDRSIVEEKLDKFGGNVHV        | 7.8                      | gi 24637237 gb AAN63622.1 AF438359_1  | thioredoxin [Triticum aestivum]                                                           |
| MGNACGGALRSKHQHSFKHAASSQR        | 7.5                      | gi 7428005 pir  T03263                | calcium-dependent protein kinase (EC 2.7.1.-) 7 - maize                                   |
| MGSCVSTTRRRRRSRKLSVAARKFR        | 7.5                      | gi 14488359 gb AAK63926.1 AC084282_7  | hypothetical protein [Oryza sativa (japonica cultivar-group)]                             |
| MGSKYSKATNSINDALSSSYLVPE         | 7.4                      | gi 32330886 gb AAP79928.1             | Pto-like serine/threonine kinase [Capsicum annuum]                                        |
| MGA AVAGEPRHNNANGGHREREGIK       | 7.4                      | gi 31430970 gb AAP52815.1             | hypothetical protein [Oryza sativa (japonica cultivar-group)]                             |
| MGASASSSAGRSKPPPPPCSSSGV         | 7.4                      | gi 31432227 gb AAP53889.1             | putative speckle-type protein [Oryza sativa (japonica cultivar-group)]                    |
| MGGVTSSTSSSPATAAGGSSYSAE         | 7.2                      | gi 20160988 dbj BAB89922.1            | putative hypersensitive-induced response protein [Oryza sativa (japonica cultivar-group)] |
| MGNSSVDESAAAIATLAESAAAG          | 7.1                      | gi 33146803 dbj BAC79751.1            | unknown protein [Oryza sativa (japonica cultivar-group)]                                  |
| MGMAAGRSKPM AASSSERGRRWSAR       | 7.0                      | gi 18087678 gb AAL58970.1 AC091811_19 | hypothetical protein [Oryza sativa]                                                       |
| MGSKYSKATNSINDALSSGYLVPE         | 7.0                      | gi 32330890 gb AAP79930.1             | Pto-like serine/threonine kinase [Capsicum annuum]                                        |
| MGQQSGGLPKQGGERNKGDGQK           | 7.0                      | gi 18479040 gb AAL73395.1 AF432345_1  | 26S proteasome regulatory subunit IV [Tortula ruralis]                                    |
| MGCWYSRIDREEIVSRCKARKRYMK        | 7.0                      | gi 22858664 gb AAN05792.1             | unknown [Gossypium hirsutum]                                                              |
| MGLAFGKLF SRLFAKKEMRILMVGL       | 6.9                      | gi 27261078 dbj BAC45192.1            | ADP-ribosylation factor 1 [Oryza sativa (japonica cultivar-group)]                        |
| MGCLSVVGASPCVSSALSSPTSRL         | 6.7                      | gi 27807824 dbj BAC55280.1            | nucleoside diphosphate kinase [Nicotiana tabacum]                                         |
| MGNNGGGNKKGRRDSSPPLETPPR         | 6.7                      | gi 31432873 gb AAP54449.1             | putative lanthionine synthetase [Oryza sativa (japonica cultivar-group)]                  |
| MGNTCVGPSISKNGFFESVSAAMWR        | 6.6                      | gi 7434364 pir  T09940                | calcium-dependent protein kinase (EC 2.7.1.-) CDPK - pumpkin                              |



| Sequence (non AT predict myrist) | HMM <sub>266</sub> Score | ID                                    | Description                                                                     |
|----------------------------------|--------------------------|---------------------------------------|---------------------------------------------------------------------------------|
| MGLSHARSGKRCNDFKVGGELESCRG       | 6.6                      | gi 13873011 dbj BAB44115.1            | B1085F09.11 [Oryza sativa (japonica cultivar-group)]                            |
| MGACASASRPPSPRHGCSPTPTM          | 6.5                      | gi 29467524 dbj BAC66713.1            | P0582D05.14 [Oryza sativa (japonica cultivar-group)]                            |
| MGSACSRKRGQLLVDEEDLYSARFS        | 6.5                      | gi 32488227 emb CAE02935.1            | OSJNBa0014K14.7 [Oryza sativa (japonica cultivar-group)]                        |
| MGGVLSSVLGGGGDEPLAGNESES         | 6.5                      | gi 25990392 gb AAN76509.1 AF352030_1  | thioredoxin h [Brassica rapa]                                                   |
| MGVLFSCPVDDETAAVEDAAPVAEQ        | 6.5                      | gi 22296385 dbj BAC10154.1            | unknown protein [Oryza sativa (japonica cultivar-group)]                        |
| MGLTSSKGGRCRQVGPTGQRLKGGR        | 6.4                      | gi 34395360 dbj BAC84430.1            | hypothetical protein [Oryza sativa (japonica cultivar-group)]                   |
| MGCTHTRHSRKRYQRRVTTRAEHL         | 6.4                      | gi 8467997 dbj BAA96598.1             | unnamed protein product [Oryza sativa (japonica cultivar-group)]                |
| MGAASSRLEKALGEQFPEGERYFGL        | 6.4                      | gi 24756890 gb AAN64154.1             | Putative ubiquitin-specific protease 3 [Oryza sativa (japonica cultivar-group)] |
| MGASTSTSNPSLEAQEQETLASASL        | 6.4                      | gi 32489048 emb CAE04845.1            | OSJNBa0084K01.17 [Oryza sativa (japonica cultivar-group)]                       |
| MGLCLSSGVAAMAAGMAASTAMV          | 6.3                      | gi 34394505 dbj BAC83793.1            | hypothetical protein [Oryza sativa (japonica cultivar-group)]                   |
| MGSKYSKATNSISDASNSFESYRFP        | 6.2                      | gi 8547238 gb AAF76313.1              | Pto kinase [Lycopersicon esculentum]                                            |
| MGAVVSHASAAAPPPPTGYAPFVD         | 6.2                      | gi 6539563 dbj BAA88180.1             | unnamed protein product [Oryza sativa (japonica cultivar-group)]                |
| MGCFLACFGDRRRRRQPRRQSPARS        | 6.2                      | gi 32488453 emb CAE03386.1            | OSJNBa0004N05.10 [Oryza sativa (japonica cultivar-group)]                       |
| MGCASSAPDRTVSRGSSSLNSANEG        | 6.2                      | gi 7438400 pir  T12437                | small GTP-binding protein - common ice plant                                    |
| MGVSASCLWGGSESRGNQNGSAAVT        | 6.2                      | gi 29893573 gb AAP06827.1             | putative receptor ser/thr protein [Oryza sativa (japonica cultivar-group)]      |
| MGCKGSKLEDQEAVALCRGRAELLA        | 6.1                      | gi 32483081 emb CAE01923.1            | OSJNBb0078D11.6 [Oryza sativa (japonica cultivar-group)]                        |
| MGNLGCASGERLVAARDGDAVE           | 6.0                      | gi 31433119 gb AAP54672.1             | hypothetical protein [Oryza sativa (japonica cultivar-group)]                   |
| MGNTCVGPSISKNGLFQSVSAAMWR        | 5.9                      | gi 16215467 emb CAC82998.1            | calcium-dependent protein kinase 2 [Nicotiana tabacum]                          |
| MGLTISKLFSRLFakkEMRILMVGL        | 5.9                      | gi 1703376 sp P51824 ARF1_SOLTU       | ADP-ribosylation factor 1                                                       |
| MGNLVSSIATSSLKRRNSILREPLF        | 5.9                      | gi 17222567 gb AAL36740.1 AF353999_20 | apocytochrome b [Mesostigma viride]                                             |

| Sequence (non AT predict myrist) | HMM <sub>266</sub> Score | ID                                    | Description                                                                                |
|----------------------------------|--------------------------|---------------------------------------|--------------------------------------------------------------------------------------------|
| MGNTCVGPSISKNGIFQSVSAAMWR        | 5.8                      | gi 16215471 emb CAC82999.1            | calcium-dependent protein kinase 3 [ <i>Nicotiana tabacum</i> ]                            |
| MGQCYARNVPVDGEGGGGVVTTTTT        | 5.8                      | gi 31433008 gb AAP54572.1             | putative kinase [ <i>Oryza sativa</i> (japonica cultivar-group)]                           |
| MGGCAAQAARADAAATGQSAARERA        | 5.7                      | gi 31126743 gb AAP44664.1             | hypothetical protein [ <i>Oryza sativa</i> (japonica cultivar-group)]                      |
| MGCRMRSGLQDPFEGVREAGVDG          | 5.7                      | gi 20303607 gb AAM19034.1 AC084748_24 | hypothetical protein [ <i>Oryza sativa</i> (japonica cultivar-group)]                      |
| MGNNGSTAHRPRVRVHRNSGGDDEA        | 5.6                      | gi 10800066 dbj BAB16486.1            | P0665D10.11 [ <i>Oryza sativa</i> (japonica cultivar-group)]                               |
| MGLSFTKLF SRLFAKKEMRILMVGL       | 5.6                      | gi 1703375 sp P51822 ARF1_DAUCA       | ADP-ribosylation factor 1                                                                  |
| MGCAGSKDVTVADVYPPTSVSLF          | 5.5                      | gi 7339706 dbj BAA92911.1             | unnamed protein product [ <i>Oryza sativa</i> (japonica cultivar-group)]                   |
| MGHSARKKKKKKGGGRKAAKDHGG         | 5.5                      | gi 32480225 emb CAE02048.1            | OJ990528_30.6 [ <i>Oryza sativa</i> (japonica cultivar-group)]                             |
| MGNTCVGPSITMNGFFQSVSTALWK        | 5.4                      | gi 7428007 pir  T02784                | calcium-dependent protein kinase (EC 2.7.1.-) - maize (strain W64A)                        |
| MGSSRSEGSSSSARQPYGSPYR           | 5.3                      | gi 31432406 gb AAP54043.1             | hypothetical protein [ <i>Oryza sativa</i> (japonica cultivar-group)]                      |
| MGNCCPGSGDAEPASSDASTGNGSS        | 5.3                      | gi 20160680 dbj BAB89623.1            | putative calcium-dependent protein kinase [ <i>Oryza sativa</i> (japonica cultivar-group)] |
| MGSCGAGAADSEWPDGVTGRDAEVG        | 5.3                      | gi 21328092 dbj BAC00676.1            | B1144D11.23 [ <i>Oryza sativa</i> (japonica cultivar-group)]                               |
| MGNACGGSLRSKYLSFKQTASQRHD        | 5.2                      | gi 32492297 emb CAE04157.1            | OSJNBa0088A01.28 [ <i>Oryza sativa</i> (japonica cultivar-group)]                          |
| MGQAFRKLFDAFFGNKEMRVVMLGL        | 5.2                      | gi 31433708 gb AAP55187.1             | putative ADP-ribosylation factor [ <i>Oryza sativa</i> (japonica cultivar-group)]          |
| MGGCVGKGRRHIEEDKLDKGGNVH         | 5.2                      | gi 24637229 gb AAN63618.1 AF435817_1  | thioredoxin h-like protein [ <i>Oryza sativa</i> ]                                         |
| MGCFGRPPSSPPHMERREILVKA          | 5.2                      | gi 18461223 dbj BAB84420.1            | P0690B02.8 [ <i>Oryza sativa</i> (japonica cultivar-group)]                                |
| MGNRLCCHDAADDEKPAAAAVSGGG        | 5.2                      | gi 20503002 gb AAM22711.1 AC098693_16 | Putative protein kinase [ <i>Oryza sativa</i> (japonica cultivar-group)]                   |
| MGNTCVGPSISKIGLFQSVSAAMWR        | 5.1                      | gi 16215475 emb CAC83000.1            | calcium-dependent protein kinase 2 [ <i>Nicotiana benthamiana</i> ]                        |
| MGNLGGKKKI AKVMKVDGTTFKLK        | 5.1                      | gi 16265861 gb AAL16667.1 AF419849_1  | unknown [ <i>Musa acuminata</i> ]                                                          |
| MGLVCSRSRRFREAHAENAQDAEI         | 4.9                      | gi 1346105 sp P49084 GBA1_SOYBN       | Guanine nucleotide-binding protein alpha-1 subunit (GP-alpha-1)                            |

| Sequence (non AT predict myrist) | HMM <sub>266</sub> Score | ID                                    | Description                                                                      |
|----------------------------------|--------------------------|---------------------------------------|----------------------------------------------------------------------------------|
| MGLTFTKLF SRLFSK KEMRILMVGL      | 4.6                      | gi 7242921 dbj BAA92519.1             | unnamed protein product [Oryza sativa (japonica cultivar-group)]                 |
| MGGGGGGSDGDDERRTVDPARRTYN        | 4.6                      | gi 23616960 dbj BAC20663.1            | hypothetical protein [Oryza sativa (japonica cultivar-group)]                    |
| MGNAIRLLRKCLNSHGVSASSGGVS        | 4.5                      | gi 18410440 ref NP_567036.1           |                                                                                  |
| MGAACGSAGPAHPACGSVAALTPA         | 4.4                      | gi 31712062 gb AAP68368.1             | hypothetical protein [Oryza sativa (japonica cultivar-group)]                    |
| MGNRARRRPGGSGDEENEQRKVGGS        | 4.3                      | gi 34393262 dbj BAC83132.1            | hypothetical protein [Oryza sativa (japonica cultivar-group)]                    |
| MGSAGALLSHSPPGLGGFPPRHHHH        | 4.3                      | gi 15408654 dbj BAB64068.1            | OsTATC [Oryza sativa (japonica cultivar-group)]                                  |
| MGLTFTKLF SRLFAK KEMRILMVGL      | 4.3                      | gi 1703380 sp P51823 ARF_ORYSA        | ADP-ribosylation factor                                                          |
| MGAGASKDVDGGLSGLS QEREVSDGG      | 4.2                      | gi 14149116 dbj BAB55655.1            | fructose-6-phosphate 2-kinase/fructose-2,6-bisphosphatase [Bruguiera gymnorhiza] |
| MGNCWGAKISSESPCRSASSPSGGT        | 4.2                      | gi 14719339 gb AAK73157.1 AC079022_30 | putative protein kinase [Oryza sativa]                                           |
| MGNTQKG DGDAMTGRAKAITGGAVK       | 4.1                      | gi 11230987 dbj BAB18105.1            | cyclic nucleotide dependent protein kinase II [Chlamydomonas reinhardtii]        |
| MGLLFGR CRVLQTGLSASTQSNSRP       | 4.0                      | gi 6063535 dbj BAA85395.1             | hypothetical protein [Oryza sativa (japonica cultivar-group)]                    |
| MGLITSGPLVPLSVGARSSPRWLSG        | 4.0                      | gi 22296391 dbj BAC10160.1            | hypothetical protein [Oryza sativa (japonica cultivar-group)]                    |
| MGLGASLGAGHAAAGVRRARRVVGG        | 4.0                      | gi 15623967 dbj BAB68022.1            | P0455H0310.11 [Oryza sativa (japonica cultivar-group)]                           |
| MGAGHRGGSGELREGAGENFGELPP        | 3.9                      | gi 28564575 dbj BAC57684.1            | putative receptor-like protein kinase [Oryza sativa (japonica cultivar-group)]   |
| MGASASSSGERRRRCGSAAIVADTV        | 3.9                      | gi 31432236 gb AAP53891.1             | hypothetical protein [Oryza sativa (japonica cultivar-group)]                    |
| MGGSGSSGPFSGSTLKTSSYRSSPI        | 3.8                      | gi 20161116 dbj BAB90045.1            | OSJNBb0049O23.2 [Oryza sativa (japonica cultivar-group)]                         |
| MGTRSSGSSSSAQRRRSDLPLIKCP        | 3.6                      | gi 27817838 dbj BAC55606.1            | hypothetical protein [Oryza sativa (japonica cultivar-group)]                    |
| MGTAVAAACAASGDSGDSGPRGDRS        | 3.6                      | gi 31415905 gb AAP50926.1             | hypothetical protein [Oryza sativa (japonica cultivar-group)]                    |
| MGAGMSSGRRPSFYGGGGGGVGRP         | 3.5                      | gi 15408827 dbj BAB64219.1            | P0581F09.16 [Oryza sativa (japonica cultivar-group)]                             |
| MGLSFTKLLGRLFSK KEMRILMVGL       | 3.5                      | gi 11131023 sp O48649 ARF_SALBA       | ADP-ribosylation factor 1                                                        |

| Sequence (non AT predict myrist) | HMM <sub>266</sub> Score | ID                                    | Description                                                            |
|----------------------------------|--------------------------|---------------------------------------|------------------------------------------------------------------------|
| MGNSCVGAAGYFQGFTSVIALGGRS        | 3.4                      | gi 2315983 gb AAB70706.1              | calmodulin-like domain protein kinase [Tortula ruralis]                |
| MGLSFTKLLGRLFSEKEMRILMVGL        | 3.4                      | gi 29124979 gb AAO63779.1             | ADP-ribosylation factor 1 [Populus tremuloides]                        |
| MGGAAAHAHTTGDGKRRRERRQRTA        | 3.4                      | gi 32487740 emb CAE05490.1            | OSJNBa0022H21.10 [Oryza sativa (japonica cultivar-group)]              |
| MGHGVSCARTGDEHDFRAAQLGDL         | 3.3                      | gi 14279688 gb AAK58690.1 AF272860_1  | receptor-like kinase Xa21-binding protein 3 [Oryza sativa]             |
| MGQCAMSHTRSTTAGAAGGKPIAP         | 3.3                      | gi 31432198 gb AAP53860.1             | putative speckle-type protein [Oryza sativa (japonica cultivar-group)] |
| MGCILGKLAAAPGSSLFFPAAAAAS        | 3.2                      | gi 20805217 dbj BAB92884.1            | putative CRK1 protein [Oryza sativa (japonica cultivar-group)]         |
| MGARCSKLSVCWWPPHFKSPLLENG        | 3.2                      | gi 15042834 gb AAK82457.1 AC091247_24 | putative protein kinase [Oryza sativa]                                 |
| MGNCFTKTYEIPITSGTMRRPASTA        | 3.2                      | gi 21741166 emb CAD41068.1            | OSJNBa0084K11.12 [Oryza sativa (japonica cultivar-group)]              |
| MGHASTDPSASDHDAPARRRRHRRR        | 3.2                      | gi 20804479 dbj BAB92175.1            | OSJNBa0016I09.27 [Oryza sativa (japonica cultivar-group)]              |
| MGA AVAGEPRHKYANGGHREKERE A      | 3.2                      | gi 32489252 emb CAE03984.1            | OSJNBa0033H08.16 [Oryza sativa (japonica cultivar-group)]              |
| MGLRFTKALSRLFGKKEMRILMVGL        | 3.1                      | gi 1703374 sp P51821 ARF1_CHLRE       | ADP-ribosylation factor 1                                              |
| MGGGGGGGRGGGDHHSPTSGKTPRG        | 3.1                      | gi 20804522 dbj BAB92216.1            | B1015E06.17 [Oryza sativa (japonica cultivar-group)]                   |
| MGCCSCFGFLRKPRVSVSRPRDADG        | 3.1                      | gi 13324784 gb AAK18832.1 AC082645_2  | putative protein kinase [Oryza sativa]                                 |
| MGNNGGASGSRGCGLRQQRQLSVQ         | 3.1                      | gi 32488775 emb CAE04328.1            | OSJNBb0016D16.19 [Oryza sativa (japonica cultivar-group)]              |
| MGNLGVREAGRMAVLSRRWRRLPGL        | 3.0                      | gi 34393595 dbj BAC83248.1            | unknown protein [Oryza sativa (japonica cultivar-group)]               |
| MGLFTVTKKATTPFDGQKPGTSGLR        | 3.0                      | gi 12585309 sp P93804 PGM1_MAIZE      | Phosphoglucomutase, cytoplasmic 1 (Glucose phosphomutase 1) (PGM 1)    |
| MGRGATSSSSSFESSNYPSVSTKS         | 3.0                      | gi 20269055 emb CAC84708.1            | aux/IAA protein [Populus tremula x Populus tremuloides]                |
| MGVLTGRPRRPPFAGSAGGANDFLA        | 3.0                      | gi 20805277 dbj BAB92943.1            | OJ1460_H08.9 [Oryza sativa (japonica cultivar-group)]                  |
| MGACTSKPSNFSVDDITVAGDGAIF        | 2.9                      | gi 16904226 gb AAL30820.1 AF435452_1  | calcium/calmodulin-dependent protein kinase CaMK3 [Nicotiana tabacum]  |
| MGGKLCLVAARSAHPSGRSAAVWPV        | 2.9                      | gi 11875149 dbj BAB19362.1            | hypothetical protein [Oryza sativa (japonica cultivar-group)]          |

| Sequence (non AT predict myrist) | HMM <sub>266</sub> Score | ID                                    | Description                                                                        |
|----------------------------------|--------------------------|---------------------------------------|------------------------------------------------------------------------------------|
| MGGSSGGGVSYRSGGESDVELEDYE        | 2.9                      | gi 15232991 ref NP_186934.1           |                                                                                    |
| MGLSIALPGVSLPPLQPIKDPVPE         | 2.8                      | gi 32489554 emb CAE03795.1            | OSJNBa0063G07.19 [Oryza sativa (japonica cultivar-group)]                          |
| MGCTTSRQARHDLRHCPSPALPR          | 2.8                      | gi 19071642 gb AAL84309.1 AC073556_26 | hypothetical protein [Oryza sativa (japonica cultivar-group)]                      |
| MGLFTVTKKATTPFEGQKPGTSGLR        | 2.8                      | gi 12585310 sp P93805 PGM2_MAIZE      | Phosphoglucomutase, cytoplasmic 2 (Glucose phosphomutase 2) (PGM 2)                |
| MGCTTSHDAFAAARARARASSSLE         | 2.8                      | gi 20146230 dbj BAB89012.1            | bzip-like transcription factor-like [Oryza sativa (japonica cultivar-group)]       |
| MGRSRGVLSSGDDDTGHRSKRRRV         | 2.8                      | gi 21898562 gb AAM77037.1             | histone acetyltransferase complex component [Zea mays]                             |
| MGGFCCLCTDDFEEY AHPNNPIYR        | 2.8                      | gi 20805222 dbj BAB92889.1            | OSJNBa0093F16.9 [Oryza sativa (japonica cultivar-group)]                           |
| MGCVCGRAAAVDDGRCGAAAEAAV         | 2.7                      | gi 20804521 dbj BAB92215.1            | putative CRK1 protein [Oryza sativa (japonica cultivar-group)]                     |
| MGGRRRGASSPALGRGRRRRVAGV         | 2.7                      | gi 22324481 dbj BAC10395.1            | hypothetical protein [Oryza sativa (japonica cultivar-group)]                      |
| MGCAQKCCVPRRQRGRGGGGAVGG         | 2.7                      | gi 23307591 dbj BAC16725.1            | putative protein phosphatase 2C (PP2C) [Oryza sativa (japonica cultivar-group)]    |
| MGNSYSNVGSPTAAGYVQAPELPLH        | 2.6                      | gi 31415968 gb AAP50988.1             | hypothetical protein [Oryza sativa (japonica cultivar-group)]                      |
| MGVARVCLDRRSLAADRRGGGSPWP        | 2.6                      | gi 23617043 dbj BAC20733.1            | hypothetical protein [Oryza sativa (japonica cultivar-group)]                      |
| MGSFASPLDAAPAPTAKPSPPPAP         | 2.6                      | gi 21742766 emb CAD40522.1            | OSJNBa0023J03.9 [Oryza sativa (japonica cultivar-group)]                           |
| MGHSPSRHNACGGGGGDGESPPSPL        | 2.5                      | gi 20146228 dbj BAB89010.1            | putative phosphatidylserine decarboxylase [Oryza sativa (japonica cultivar-group)] |
| MGCCGMSSTSRAPRGIREETLLRV         | 2.4                      | gi 20160545 dbj BAB89494.1            | P0022F10.10 [Oryza sativa (japonica cultivar-group)]                               |
| MGQYSSTHCGGGPKLRHRNLHPSPL        | 2.4                      | gi 30013671 gb AAP03878.1             | Avr9/Cf-9 rapidly elicited protein 189 [Nicotiana tabacum]                         |
| MGNCCGTDGFKHERPLPAHPNRQGE        | 2.3                      | gi 23268465 gb AAN11310.1             | calmodulin domain protein kinase 1 [Ceratopteris richardii]                        |
| MGGRGAGGEAHDDPFRSRSSSFGAV        | 2.3                      | gi 15128233 dbj BAB62561.1            | OSJNBa0089K24.19 [Oryza sativa (japonica cultivar-group)]                          |
| MGSRRAGSSSPLFWPAPPSRAADP         | 2.3                      | gi 82363 pir  S04860                  | alpha-amylase/subtilisin inhibitor precursor - barley                              |
| MGARASAFRLLEINRQPQLKRAQP         | 2.3                      | gi 20804644 dbj BAB92333.1            | P0510F09.5 [Oryza sativa (japonica cultivar-group)]                                |

| Sequence (non AT predict myrist) | HMM <sub>266</sub> Score | ID                                    | Description                                                                                   |
|----------------------------------|--------------------------|---------------------------------------|-----------------------------------------------------------------------------------------------|
| MGNASGRLLDDIADAEMDDGGGGGNR       | 2.2                      | gi 22324436 dbj BAC10353.1            | AKIN beta1-like protein [Oryza sativa (japonica cultivar-group)]                              |
| MGNIASSGGASPRPPPPHLEAYRHG        | 2.2                      | gi 14587218 dbj BAB61152.1            | B1045D11.20 [Oryza sativa (japonica cultivar-group)]                                          |
| MGNMGSSGGHRRRNNGHGRHHHHGQ        | 2.1                      | gi 31430853 gb AAP52712.1             | putative hydroxyproline-rich glycoprotein [Oryza sativa (japonica cultivar-group)]            |
| MGGFAASNIVSESGEKASNLVYRGR        | 2.1                      | gi 34394682 dbj BAC83988.1            | hypothetical protein [Oryza sativa (japonica cultivar-group)]                                 |
| MGP GASKETPTQQQKPAESVSTPPE       | 2.1                      | gi 20161674 dbj BAB90592.1            | P0697D09.21 [Oryza sativa (japonica cultivar-group)]                                          |
| MGNCAVTQHAVSWADDGEWELPESG        | 2.0                      | gi 20146273 dbj BAB89055.1            | P0684C02.11 [Oryza sativa (japonica cultivar-group)]                                          |
| MGSGCSSPSISLTTIATSHFQSQES        | 1.9                      | gi 20138145 sp O22494 GSHB_LYCES      | Glutathione synthetase, chloroplast precursor (Glutathione synthase) (GSH synthetase) (GSH-S) |
| MGLRLAGGEVAVGSSGRGGGGRWHG        | 1.9                      | gi 31415932 gb AAP50953.1             | hypothetical protein [Oryza sativa (japonica cultivar-group)]                                 |
| MGQCAMSPARSGTTAGSGGGPTPSS        | 1.9                      | gi 31432194 gb AAP53856.1             | putative speckle-type protein [Oryza sativa (japonica cultivar-group)]                        |
| MGSILSSLIGGEPAAALESDDHAVK        | 1.8                      | gi 27466896 gb AAO12855.1             | thioredoxin h [Pisum sativum]                                                                 |
| MGCGESKHAVATENATIPKNKRSL         | 1.8                      | gi 1216214 emb CAA65228.1             | glutamic acid-rich protein [Solanum berthaultii]                                              |
| MGGRCVGA AVKCGEGAAGGAE EGVG      | 1.7                      | gi 31431866 gb AAP53578.1             | hypothetical protein [Oryza sativa (japonica cultivar-group)]                                 |
| MGGGGGSSRSSKVYHERQRLQFCLL        | 1.6                      | gi 29893581 gb AAP06835.1             | unknown protein [Oryza sativa (japonica cultivar-group)]                                      |
| MGCGESKHAVATANATIPKNKRSL         | 1.6                      | gi 21435776 gb AAM53961.1 AF515615_1  | TSB [Lycopersicon esculentum]                                                                 |
| MGSSSATSNRLLLSKIATSEGHGEN        | 1.5                      | gi 8570043 dbj BAA96743.1             | 1-aminocyclopropane-1-carboxylate synthase [Prunus persica]                                   |
| MGTAGGCERAPRGRGSPAAAPARGG        | 1.4                      | gi 20804917 dbj BAB92597.1            | B1070A12.21 [Oryza sativa (japonica cultivar-group)]                                          |
| MGARRRRAWRSGPAAWRARGGGGV         | 1.3                      | gi 22535613 dbj BAC10787.1            | B1096D03.22 [Oryza sativa (japonica cultivar-group)]                                          |
| MGSRTTRGFGVEDDKGAERGMPFN         | 1.3                      | gi 15148924 gb AAK84889.1 AF402608_1  | TGA-type basic leucine zipper protein TGA2.1 [Phaseolus vulgaris]                             |
| MGSCGGAARAAGSAVTVGKLVKLLL        | 1.3                      | gi 18071350 gb AAL58209.1 AC090882_12 | hypothetical protein [Oryza sativa (japonica cultivar-group)]                                 |
| MGLLLVLNLR SATSLSGSGGLI AVH      | 1.2                      | gi 31431566 gb AAP53324.1             | hypothetical protein [Oryza sativa (japonica cultivar-group)]                                 |

| Sequence (non AT predict myrist) | HMM <sub>266</sub> Score | ID                                   | Description                                                                                   |
|----------------------------------|--------------------------|--------------------------------------|-----------------------------------------------------------------------------------------------|
| MGRRRRGGGEKTPYVEESDNAVRP         | 1.2                      | gi 14090218 dbj BAB55479.1           | P0494A10.19 [Oryza sativa (japonica cultivar-group)]                                          |
| MGHGLSCSRDTDEYDLFRAAQLGDI        | 1.2                      | gi 15290134 dbj BAB63825.1           | putative receptor-like kinase Xa21-binding protein 3 [Oryza sativa (japonica cultivar-group)] |
| MGVLFSCPVDDYDALEESAAAAAAA        | 1.1                      | gi 31249708 gb AAP46201.1            | hypothetical protein [Oryza sativa (japonica cultivar-group)]                                 |
| MGNCNCLERARAKVTAWGAEEDGG         | 1.1                      | gi 27261040 dbj BAC45156.1           | unknown protein [Oryza sativa (japonica cultivar-group)]                                      |
| MGNCFSSSKVSGSNSNTPSTTATA         | 1.1                      | gi 16904224 gb AAL30819.1 AF435451_1 | calcium/calmodulin-dependent protein kinase CaMK2 [Nicotiana tabacum]                         |
| MGITHANSITTEPSPRPPLRL            | 1.1                      | gi 24059896 dbj BAC21362.1           | aminoacyl peptidase-like [Oryza sativa (japonica cultivar-group)]                             |
| MGGAVARAPGNQKQKSDLAGSQRR         | 1.0                      | gi 22535687 dbj BAC10861.1           | hypothetical protein [Oryza sativa (japonica cultivar-group)]                                 |
| MGASTSTEQKVSIEQREAEALAAST        | 1.0                      | gi 27450531 gb AAO14626.1 AF467900_3 | hypothetical protein [Prunus persica]                                                         |
| MGMAASRRWAGGKRGWRRSDRGELL        | 0.9                      | gi 14090213 dbj BAB55474.1           | P0494A10.14 [Oryza sativa (japonica cultivar-group)]                                          |
| MGLSSLRPHRRGALSGGGGGGGGQ         | 0.9                      | gi 32482882 emb CAE02255.1           | OSJNBb0032E06.14 [Oryza sativa (japonica cultivar-group)]                                     |
| MGFAVVRTNREFVRPSAATPPSSGE        | 0.9                      | gi 8468020 dbj BAA96620.1            | unnamed protein product [Oryza sativa (japonica cultivar-group)]                              |
| MGIAFSKNWWSRFGSSPLSVMVCE         | 0.8                      | gi 34394463 dbj BAC83676.1           | unknown protein [Oryza sativa (japonica cultivar-group)]                                      |
| MGNMGSKSCASAPLESKVTRSS           | 0.8                      | gi 33146495 dbj BAC79604.1           | putative serine/threonine-specific protein kinase [Oryza sativa (japonica cultivar-group)]    |
| MGYLSSVIPTDGSPVSGGGLSQNGK        | 0.8                      | gi 32488314 emb CAE02891.1           | OSJNBa0015K02.8 [Oryza sativa (japonica cultivar-group)]                                      |
| MGGSSAPPSSTSSHNNSTFSPDFPS        | 0.7                      | gi 7488838 pir  T06536               | protein-tyrosine-phosphatase (EC 3.1.3.48) - garden pea                                       |
| MGASASVLSLPTAAAIPGAATAIAG        | 0.7                      | gi 32488872 emb CAE03544.1           | OSJNBa0060D06.10 [Oryza sativa (japonica cultivar-group)]                                     |
| MGGRVSKAVACCCRSQHGGVVVES         | 0.7                      | gi 32488705 emb CAE03448.1           | OSJNBa0088H09.6 [Oryza sativa (japonica cultivar-group)]                                      |
| MGSSYGTVDVEAIREAQRAQGLATI        | 0.7                      | gi 1403038 emb CAA62683.1            | chalcone synthase [Gerbera hybrid cv. 'Terra Regina']                                         |
| MGGGGSGSSSISPLVSVFLGAAMA         | 0.7                      | gi 28269397 gb AAO37940.1            | putative regulatory protein [Oryza sativa (japonica cultivar-group)]                          |
| MGSALSGSGSLLVLSVSVVGILF          | 0.7                      | gi 28071301 dbj BAC55990.1           | P0705A05.3 [Oryza sativa (japonica cultivar-group)]                                           |

| <b>Sequence (non AT predict myrist)</b> | <b>HMM<sub>266</sub> Score</b> | <b>ID</b>                  | <b>Description</b>                                        |
|-----------------------------------------|--------------------------------|----------------------------|-----------------------------------------------------------|
| MGEAASTEEDADAIKEDEAASTEE                | 0.6                            | gi 14587269 dbj BAB61187.1 | OSJNBb0032H19.20 [Oryza sativa (japonica cultivar-group)] |



**Supplementary Table 6.** Predicted internal myristoylation sites in *Arabidopsis thaliana*.

| Sequence (predicted myrist - internal) | HMM <sub>266</sub> Score | ID          | Start pos | Description                                                                      |
|----------------------------------------|--------------------------|-------------|-----------|----------------------------------------------------------------------------------|
| MGSIYARQVREDPNWSGSGSRRYSYG             | 19.4                     | At2g19090.1 | 744       | hypothetical protein                                                             |
| MGAIIYARQLKEDTSPVTDSSRKYSR             | 16.3                     | At4g30130.1 | 631       | expressed protein bZIP protein - Arabidopsis thaliana, PID:g600855               |
| MGGSSSKESPRGGGSGRRYERSVSG              | 12.7                     | At1g67800.2 | 21        | copine-related low similarity to SP Q99829 Copine I {Homo sapiens}               |
| MGSKFSKNGKTAKRSISVEEENLVL              | 12.6                     | At2g35160.1 | 195       | SET-domain transcriptional regulator family identical to SUVH5 [Arabidopsis thal |
| MGAAFSTQESDGSSTENNRAYSSY               | 10.2                     | At5g07060.1 | 316       | RRM-containing RNA-binding protein, putative                                     |
| MGSSSSSPKPDNVQEAENEKNEFASLS            | 9.8                      | At1g53670.1 | 50        | transcriptional regulator -related found within GB:AE000666 from [Methanobacteri |
| MGGSYSGSASMAFEYHETRAPVTES              | 9.6                      | At4g02880.1 | 85        | expressed protein similar to A. thaliana hypothetical protein F15K9.11, GenBank  |
| MGNGFSYGSSSSSFNEERNDGSAS               | 9.2                      | At5g56110.1 | 214       | myb family transcription factor contains PFAM profile: Myb DNA binding domain PF |
| MGNAAKVRGSLERKKSFSKEGDS                | 9.1                      | At3g12710.1 | 36        | expressed protein contains similarity to 3-methyladenine-DNA glycosidase I GB:P0 |
| MGSSISTSKTSVWPPEDPSAKIDEA              | 9.1                      | At5g61300.1 | 93        | hypothetical protein predicted protein, Arabidopsis thaliana                     |
| MGLSYSSNPTPLDNDQKKPSPATAV              | 9.0                      | At5g60200.1 | 21        | Dof zinc finger protein similar to dof6 zinc finger protein GI:5689615 from [Ara |
| MGGGKSNSSPDSREVREREGIPEL               | 8.8                      | At1g21740.1 | 321       | bzip-related transcription factor similar to GB:AAB81673, EST gb T20649 comes fr |
| MGMGMGGPYGSQDPNDPFNQPPSPP              | 8.4                      | At3g07560.1 | 168       | glycine-rich protein                                                             |
| MGGSGSSSSISNLAENKSSGSLLL               | 7.9                      | At5g23000.1 | 295       | myb family transcription factor contains PFAM profile: myb DNA binding domain PF |
| MGLCLVRASAETGEEESDDQNKPER              | 7.9                      | At4g21445.1 | 47        | receptor-interacting protein (PRIP) -related annotation temporarily based on sup |
| MGGSSSGNNTLSGPFNGSGVNWGAP              | 7.8                      | At3g07810.1 | 340       | heterogeneous nuclear ribonucleoprotein (hnRNP), putative contains Pfam profile: |
| MGGSSSGNNTLSGPFNGSGVNWGAP              | 7.8                      | At3g07810.2 | 340       | heterogeneous nuclear ribonucleoprotein (hnRNP), putative contains Pfam profile: |
| MGGACSRKRDRQVEDILNRGVSGKY              | 7.3                      | At1g15740.1 | 8         | leucine rich repeat protein-related                                              |
| MGLCCSDKLRMNRGAPPQDVVTAFFV             | 7.1                      | At5g58690.1 | 10        | phosphoinositide-specific phospholipase C, putative similar to phosphoinositide- |
| MGGLVSNNNSNDHNKNCNKGGKGR               | 7.1                      | At1g64000.1 | 71        | WRKY family transcription factor similar to WRKY DNA binding protein GB:CAB97004 |

| Sequence (predicted myrist - internal) | HMM <sub>266</sub> Score | ID          | Start pos | Description                                                                      |
|----------------------------------------|--------------------------|-------------|-----------|----------------------------------------------------------------------------------|
| MMSGSSVVLDSSENGVEAESRKLPS              | 7.0                      | At1g13260.1 | 36        | AP2 domain transcription factor, putative (RAV1) identical to RAV1 GI:3868857 f  |
| MGNFYFAVPPGVRVMPQYPGSPLASP             | 7.0                      | At3g20250.1 | 531       | pumilio-family RNA-binding protein, putative contains Pfam profile: PF00806 Pumi |
| MGSNSSTEFPASSTQNSLTRKAGGR              | 7.0                      | At5g41150.1 | 693       | repair endonuclease (gb AAF01274.1)                                              |
| MGNFCSRPCNLSFGSYSSLREQFGK              | 6.7                      | At5g22110.1 | 318       | DNA polymerase epsilon subunit B-related temporary automated functional assignme |
| MGGSYSRNATNETANVVQQGQDKLK              | 6.7                      | At5g53150.1 | 295       | DnaJ protein family low similarity to AHM1 [Triticum aestivum] GI:6691467; conta |
| MGLSASRATSQFCGRRANKNQAPEG              | 6.7                      | At3g42060.1 | 154       | myosin heavy chain-related                                                       |
| MGVNASEPKRTRSRPSQSQRHPST               | 6.7                      | At3g57120.1 | 23        | protein kinase family contains eukaryotic protein kinase domain, INTERPRO:IPR000 |
| MMSGSSSLFGNGNKKREIEHENGIT              | 6.5                      | At3g58110.1 | 527       | expressed protein putative protein At2g42370 - Arabidopsis thaliana, TREMBLNEW:  |
| MGLCNSSENSPPVSVSPSEVPATAE              | 6.4                      | At1g64380.1 | 280       | AP2 domain transcription factor RAP2, putative contains Pfam profile: PF00847 AP |
| MGGTVSTSNQQVVPQQNQFTGIPP               | 6.3                      | At1g21630.1 | 142       | calcium-binding EF-hand family protein contains INTERPRO:IPR002048 calcium-bindi |
| MGLLVSRKDHDPGHHQAPYNSNYCVV             | 6.2                      | At1g62190.1 | 220       | hypothetical protein similar to unknown protein GI:3445206 from [Arabidopsis tha |
| MGGVNSKKPQDFGSGVQDPEKNKLF              | 6.1                      | At5g05160.1 | 307       | leucine-rich repeat transmembrane protein kinase, putative                       |
| MGNCYSLQKDHETALKNFLRAVQLN              | 6.0                      | At2g20000.1 | 524       | cell division cycle (CDC) protein - related low similarity to SP P30260 CC27_HUM |
| MGTGTSSSWRSQQSQNSYYSHQENE              | 6.0                      | At4g02560.1 | 864       | LUMINIDEPENDENS protein                                                          |
| MGSSVSKVVMMSDKSKQVESSTDS               | 5.9                      | At2g34310.1 | 150       | expressed protein                                                                |
| MGSSVSKVVMMSDKSKQVESSTDS               | 5.9                      | At2g34310.2 | 150       | expressed protein                                                                |
| MGSSVSKVVMMSDKSKQVESSTDS               | 5.9                      | At2g34310.3 | 150       | expressed protein                                                                |
| MMSGVSRALSYGFEVGDVWGVKVS               | 5.9                      | At5g27650.1 | 159       | PWWP domain protein hypothetical protein F22F7.12 - Arabidopsis thaliana, EMBL:A |
| MGQNYRGPSPPPNMSQNYEGPPPP               | 5.8                      | At1g53260.1 | 297       | hypothetical protein low similarity to SP Q38732 DAG protein, chloroplast precur |
| MGNLFCSEYRIQRRFDLKGSSHGRS              | 5.8                      | At1g21980.1 | 519       | phosphatidylinositol-4-phosphate 5-kinase -related similar to phosphatidylinosit |
| MGGSSSGSPSYGQRSNNSSKMALKE              | 5.7                      | At5g50380.1 | 567       | exocyst subunit EXO70 family contains Pfam domain PF03081: Exo70 exocyst complex |

| Sequence (predicted myrist - internal) | HMM <sub>266</sub> Score | ID          | Start pos | Description                                                                                     |
|----------------------------------------|--------------------------|-------------|-----------|-------------------------------------------------------------------------------------------------|
| MGCSASLISVDVARDLLQVHPNSNA              | 5.5                      | At1g25450.1 | 218       | very-long-chain fatty acid condensing enzyme (CUT1), putative nearly identical t                |
| MGCCCGGTELIAENGTEEFYGGCR               | 5.4                      | At2g16910.1 | 39        | bHLH protein                                                                                    |
| MGCKVSWTENSVTVTGPPRDAFGMR              | 5.2                      | At2g45300.1 | 369       | 3-phosphoshikimate 1-carboxyvinyltransferase (5-enolpyruvylshikimate-3-phosphate                |
| MGCKVSWTENSVTVTGPSRDAFGMR              | 5.2                      | At1g48860.1 | 370       | 3-phosphoshikimate 1-carboxyvinyltransferase (5-enolpyruvylshikimate-3-phosphate                |
| MGSFLAGSTEAPGAYEYRNGRRVKK              | 5.2                      | At1g16350.1 | 376       | inosine-5'-monophosphate dehydrogenase, putative strong similarity to SP P47996                 |
| MGLCFSSTYATVDVMPHEVDTEVPD              | 5.2                      | At3g49500.1 | 552       | RNA-dependent RNA polymerase SDE1 RNA-directed RNA polymerase                                   |
| MGGSSRRESETESSLSDTRNPPRR               | 5.2                      | At3g55005.1 | 150       | tonneau 1b (TON1b) annotation temporarily based on supporting cDNA gi 11494366 g                |
| MGGSSSSPTSSSSPAKRGKKNKG                | 5.1                      | At4g28840.1 | 11        | expressed protein                                                                               |
| MGVFLSNSSTAESPQKSLDDNVATG              | 5.1                      | At4g30790.1 | 778       | expressed protein                                                                               |
| MGAACVRVANELGKGDADAVRFSIK              | 5.1                      | At5g17700.1 | 314       | MATE efflux protein family similar to ripening regulated protein DDTFR18 [Lycopericon obscurum] |
| MGNLISVLVHCDERGVSEVILGDDSH             | 5.0                      | At3g04520.1 | 68        | L-allo-threonine aldolase -related similar to L-ALLO-THREONINE ALDOLASE GB:O0705                |
| MGHSFRVPTSQALKTRRRRSTAGP               | 5.0                      | At4g14210.1 | 30        | phytoene dehydrogenase precursor [phytoene desaturase] (PDS) identical to GI:289                |
| MGISVSSGLRLQIPEESEDQEFVEL              | 4.9                      | At2g36360.1 | 369       | Kelch repeat-containing protein low similarity to rngB protein, Dictyostelium di                |
| MGQSTSKFRRSKTTFTSPVLPNLRE              | 4.8                      | At4g07400.1 | 38        | F-box protein family (FBL8) (FBL24) contains similarity to SKP1 interacting part                |
| MGNSAGSLFRDKETQKRAGEIHAK               | 4.7                      | At5g01030.1 | 197       | expressed protein predicted proteins, Arabidopsis thaliana                                      |
| MGNSAGSLFRDKETQKRAGEIHAK               | 4.7                      | At5g01030.2 | 197       | expressed protein predicted proteins, Arabidopsis thaliana                                      |
| MGCCGSKMGKRGFSDRMVSLHNLVS              | 4.7                      | At1g03590.1 | 8         | protein phosphatase 2C (PP2C) similar to GB:AAB97706                                            |
| MGSRLGKPPSSMESSPPFIWGLSS               | 4.6                      | At5g16280.1 | 1180      | expressed protein KIAA1012 protein - Homo sapiens, EMBL:AB023229                                |
| MGCGFSGQIPESIGSLEQLVTLNLN              | 4.6                      | At5g49780.1 | 198       | leucine-rich repeat transmembrane protein kinase, putative                                      |
| MGSSSRTVSGSEIVRKAKQPPVLHG              | 4.6                      | At3g09600.1 | 188       | myb family transcription factor contains Pfam profile: PF00249 myb-like DNA-bind                |
| MGSRNSKALSYGFEVGDMMVWGKVK              | 4.6                      | At3g05430.1 | 121       | PWWP domain protein contains Pfam profile:PF00855 PWWP domain                                   |
| MGLSFSVPEGEKLPSSLLNIFKELH              | 4.6                      | At3g18630.1 | 182       | uracil-DNA glycosylase -related similar to uracil-DNA glycosylase GB:P39615 from                |

| Sequence (predicted myrist - internal) | HMM <sub>266</sub> Score | ID          | Start pos | Description                                                                      |
|----------------------------------------|--------------------------|-------------|-----------|----------------------------------------------------------------------------------|
| MMSGTSVVLDSSENGVEVEVEAESRK             | 4.5                      | At3g25730.1 | 32        | AP2 domain transcription factor, putative contains Pfam profile: PF00847 AP2 dom |
| MGCSASLISVDIVKNIFKSYANKLA              | 4.5                      | At2g28630.1 | 166       | beta-ketoacyl-CoA synthase family                                                |
| MGNNLGKKESDREEKGSSIFDDLIP              | 4.4                      | At4g12770.1 | 169       | auxilin-related low similarity to SP Q27974 Auxilin {Bos taurus}                 |
| MGSKDSSEFFHDPSMKSSNAGQVRK              | 4.4                      | At1g71260.1 | 126       | expressed protein                                                                |
| MGASNVRSKSRKLVSPQVGNRSK                | 4.4                      | At5g11530.1 | 161       | expressed protein                                                                |
| MGAVISTQEAGGSSTENNGASSSY               | 4.4                      | At1g07360.1 | 360       | RRM-containing RNA-binding protein, putative                                     |
| MGGQTSSSSSQGFVARNEKDCLDRS              | 4.3                      | At5g20200.1 | 264       | expressed protein predicted proteins - Arabidopsis thaliana                      |
| MGSTITRNKKGKFSRSSQKKKTQKPK             | 4.3                      | At3g14980.1 | 558       | PHD finger transcription factor, putative contains Pfam profile: PF00628 PHD-fin |
| MGSSRGSPRSNIEDFHGRSRMLDN               | 4.2                      | At1g70180.1 | 315       | expressed protein contains similarity to arginine/serine-rich protein GI:6601502 |
| MGSSRGSPRSNIEDFHGRSRMLDN               | 4.2                      | At1g70180.2 | 315       | expressed protein contains similarity to arginine/serine-rich protein GI:6601502 |
| MGSSATTSIKEDVVSQVLRDCKPGR              | 4.1                      | At3g42230.1 | 167       | hypothetical protein various predicted transposase like proteins                 |
| MGLVFSSNQDAATATATAAFSTSEA              | 4.1                      | At4g16110.1 | 538       | response regulator protein family similar to ARR2 protein GI:4210451 from [Arabi |
| MGGGGSSVVLDSSENGVETESRKLPS             | 4.0                      | At1g25560.1 | 45        | AP2 domain transcription factor, putative similar to DNA-binding protein RAV2 GI |
| MGSRGSRRAIDGEDEYYSLILNFK               | 4.0                      | At4g39960.1 | 188       | DnaJ protein, putative similar to SP Q9S5A3 Chaperone protein dnaJ {Listeria mon |
| MGSKISTGCKSLSGTSPVAVVAGI               | 4.0                      | At5g19660.1 | 394       | subtilisin-related protein subtilisin/kexin isozyme SKI-1 precursor - Rattus nor |
| MGLGFSSNCSSDWNQTLQEDLNSS               | 3.9                      | At1g61660.1 | 91        | expressed protein                                                                |
| MGLGFSSNCSSDWNQTLQEDLNSS               | 3.9                      | At1g61660.2 | 91        | expressed protein                                                                |
| MGNSSSSTWKEIGFWPTHRKFESFG              | 3.9                      | At4g10210.1 | 277       | hypothetical protein IB1C3-1 protein, Arabidopsis thaliana, AJ011845 contains Pf |
| MGAIRSRRTSLSSSTSLPLHQTRP               | 3.8                      | At3g47820.1 | 135       | armadillo repeat containing protein                                              |
| MGGAFARGYVQQAVSDTDSRRCHPL              | 3.8                      | At1g01440.1 | 250       | hypothetical protein similar to hypothetical protein GB:CAB80918 GI:7267606 from |
| MGALMASSVPARGRRRESNNKKKDV              | 3.8                      | At4g18770.1 | 342       | myb family transcription factor identical to transcription factor (MYB98) GI:153 |
| MGNLFCSEYRIHKRFDLKGSSHGRT              | 3.8                      | At2g26420.1 | 493       | phosphatidylinositol-4-phosphate 5-kinase -related                               |
| MGNTVVRARREARFYKRIAIDYVYA              | 3.8                      | At1g31120.1 | 743       | potassium transporter, putative (KUP10/HAK10/KT10/POT10) similar to potassium tr |
| MGISIAKHRLEILKLARRDRKNSPP              | 3.7                      | At1g15760.1 | 47        | hypothetical protein preedicted by genemark.hmm                                  |

| Sequence (predicted myrist - internal) | HMM <sub>266</sub> Score | ID          | Start pos | Description                                                                      |
|----------------------------------------|--------------------------|-------------|-----------|----------------------------------------------------------------------------------|
| MGSFLAGSTEAPGGYEYTNKGRIKK              | 3.7                      | At1g79470.1 | 377       | inosine-5'-monophosphate dehydrogenase identical to inosine-5'-monophosphate deh |
| MGISFAKDTDCTVRAYSDDYGGCK               | 3.7                      | At1g34090.1 | 477       | polyprotein -related similar to polyprotein GI:4996361 from [Arabidopsis thalian |
| MGAVSSSKESGSSTSDNRGASSSSY              | 3.7                      | At2g29580.1 | 366       | RRM-containing RNA-binding protein, putative                                     |
| MGQSSSNEPEVEKKREPEPEPEPEV              | 3.7                      | At1g12270.1 | 207       | stress inducible protein (sti), putative similar to sti (stress inducible protei |
| MGSSSASHSSTASLEAGVASLEIPG              | 3.7                      | At1g04140.1 | 466       | transducin / WD-40 repeat protein family contains 4 WD-40 repeats (PF00400); sim |
| MGSSSASHSSTASLEAGVASLEIPG              | 3.7                      | At1g04140.2 | 466       | transducin / WD-40 repeat protein family contains 4 WD-40 repeats (PF00400); sim |
| MGSYFRKMSKPEWVNALQRLRTSKL              | 3.6                      | At3g04210.1 | 444       | disease resistance protein (TIR-NBS class), putative domain signature TIR-NBS ex |
| MGGVISTIGSGESESVVDRGVEVAV              | 3.6                      | At3g30170.1 | 6         | hypothetical protein similar to mutator-like transposase GB:AAD19776 GI:4388821  |
| MGLACASPIPQRRPNIKEALQVLER              | 3.6                      | At5g67280.1 | 719       | leucine-rich repeat transmembrane protein kinase, putative                       |
| MGNLFCSEYRIQRRFDLKGSSHGRY              | 3.6                      | At1g77740.1 | 521       | phosphatidylinositol-4-phosphate-5-kinase -related similar to phosphatidylinosit |
| MGNTVVRARREARFYKkiaIDYVYA              | 3.6                      | At2g35060.1 | 739       | potassium transporter, putative (KUP11/HAK11/KT11/POT11) similar to potassium tr |
| MGGGDSLEAGTSTDQGAFGSLGYCT              | 3.5                      | At4g00840.1 | 25        | DHHC-type zinc finger domain-containing protein contains Pfam profile PF01529: D |
| MGNFSSTLQALHLRKNHLSGVFPEN              | 3.5                      | At2g15040.1 | 659       | disease resistance protein -related                                              |
| MGLSATKNAEIPVGNspeeSRNLLN              | 3.5                      | At1g65070.1 | 71        | DNA mismatch repair MutS family contains Pfam profile PF00488: MutS domain V     |
| MGVRsSTGSLRSRHVSRDSGDYLID              | 3.5                      | At5g15680.1 | 1491      | expressed protein                                                                |
| MGGAGGTVTATSPGTSSAENNTWSS              | 3.4                      | At1g49720.1 | 267       | abscisic acid responsive elements-binding factor identical to abscisic acid resp |
| MGNGHVSGPSASVFFQPKFGVSSPS              | 3.4                      | At1g01500.1 | 163       | expressed protein                                                                |
| MGNINSNSFQHPCVSKAQHYSAVEG              | 3.4                      | At5g40120.1 | 281       | MADS-box protein predicted proteins, Arabidopsis thaliana                        |
| MGNLFCSEYsiHRRFDLKGSSHGRl              | 3.4                      | At3g07960.1 | 496       | phosphatidylinositol-4-phosphate 5-kinase -related similar to phosphatidylinosit |
| MGNLFCSEYsiHRRFDLKGSSLGRT              | 3.4                      | At3g56960.1 | 557       | phosphatidylinositol-4-phosphate 5-kinase-related protein phosphatidylinositol-4 |
| MGGSSHGQQYVPFATSSGSLRV                 | 3.4                      | At4g11850.1 | 13        | phospholipase D-gamma, putative similar to phospholipase D-gamma-2 GI:5052357 fr |

| Sequence (predicted myrist - internal) | HMM <sub>266</sub> Score | ID          | Start pos | Description                                                                      |
|----------------------------------------|--------------------------|-------------|-----------|----------------------------------------------------------------------------------|
| MGNASAGERARNTGVQANELVESAL              | 3.3                      | At3g06810.1 | 342       | acetyl-coA dehydrogenase -related similar to acetyl-coenzyme A dehydrogenase GB: |
| MGSSVCTSLVEVGELGRLSASIKKL              | 3.3                      | At1g01820.1 | 131       | expressed protein                                                                |
| MGQLFSASRQTLIVRAQDVEQIPDI              | 3.3                      | At4g11130.1 | 518       | RNA-directed RNA polymerase -related RNA-directed RNA polymerase - Nicotiana tab |
| MGAAAVLMSSNDHDRDNAKYELLHV              | 3.2                      | At5g49070.1 | 238       | beta-ketoacyl-CoA synthase family similar to very-long-chain fatty acid condensi |
| MGCSVTGVKSPASGDSPLQLGPKED              | 3.2                      | At3g63410.1 | 269       | chloroplast inner envelope membrane protein, putative similar to SP P23525 37 kD |
| MGAGVSGEPTAEENVQVASSMSNQE              | 3.2                      | At3g17440.1 | 116       | expressed protein contains Pfam profile: PF00190 11S plant seed storage protein  |
| MGATSSTSPTTTTITDQSAYLQSFA              | 3.2                      | At1g03840.1 | 387       | expressed protein contains Zinc finger,C2H2 type,domain                          |
| MGCNYSKKGSEKLSCNMVSPCPGSF              | 3.2                      | At3g54530.1 | 23        | hypothetical protein                                                             |
| MGVVGSSLVKEFLDDGNFVIKNTWD              | 3.2                      | At2g01780.1 | 85        | S-locus glycoprotein, putative similar to S-locus glycoprotein from [Brassica ol |
| MGGSSSVVLDPENGLTESRKLPS                | 3.1                      | At1g68840.1 | 38        | AP2 domain protein RAP2.8 (RAV2) identical to RAV2 GI:3868859 from [Arabidopsis  |
| MGGTGLGRSGATAMRPPNPMTGS                | 3.1                      | At2g43160.1 | 774       | clathrin binding protein (epsin) -related                                        |
| MGGTGLGRSGATAMRPPNPMTGS                | 3.1                      | At2g43160.2 | 774       | clathrin binding protein (epsin) -related                                        |
| MGLVFGREYELESNNLESECLKGL               | 3.1                      | At1g01190.1 | 223       | cytochrome P450, putative similar to cytochrome P450 SP:O48927 from [Glycine max |
| MGNVHSGKRAMVISSLKKANISASR              | 3.1                      | At4g31115.1 | 40        | expressed protein supported by full length cDNA gi:21436034 from [Arabidopsis th |
| MGSSLRRHATLLWPDDHAEFCNVME              | 3.1                      | At4g21690.1 | 135       | gibberellin 3 beta-hydroxylase family similar to gibberellin 3 beta-hydroxylase  |
| MGQTSVCEWRQFLNANQSSIAGEKV              | 3.1                      | At5g59660.1 | 779       | leucine rich repeat protein kinase, putative similar to light repressible recept |
| MGSSRRDSETESSSSLESRNPPRR               | 3.0                      | At3g55000.1 | 150       | expressed protein                                                                |
| MGLLVGDSVKEAYARAKSAKPTNP               | 3.0                      | At5g11000.1 | 144       | expressed protein predicted proteins, Arabidopsis thaliana                       |
| MGASSSSHRISTRHRWTPSTQLQI               | 3.0                      | At1g20700.1 | 81        | homeodomain protein PALE-2, putative strong similarity to homeodomain protein PA |
| MGRSSKIAGRKGAQDSKKAKLYCR               | 2.9                      | At2g25830.1 | 84        | expressed protein                                                                |
| MGFLRSKSNNGSTSRSRSRGRSR                | 2.9                      | At5g03110.1 | 22        | expressed protein various predicted proteins, Arabidopsis thaliana               |
| MGASHGWGFCDRTDRSVRISDIFN               | 2.9                      | At1g05550.1 | 196       | hypothetical protein                                                             |
| MGNACSLFSAMPLKSPASWNILIGG              | 2.9                      | At4g22760.1 | 486       | selenium-binding protein-related temporary automated functional assignment       |

| Sequence (predicted myrist - internal) | HMM <sub>266</sub> Score | ID          | Start pos | Description                                                                      |
|----------------------------------------|--------------------------|-------------|-----------|----------------------------------------------------------------------------------|
| MGSSSSSTLTEHNSLTGAKSGLGPV              | 2.9                      | At3g05710.1 | 24        | syntaxin of plants SYP43 similar to putative syntaxin protein (GB:CAB52175) [Ara |
| MGSSSSSTLTEHNSLTGAKSGLGPV              | 2.9                      | At3g05710.2 | 24        | syntaxin of plants SYP43 similar to putative syntaxin protein (GB:CAB52175) [Ara |
| MGLCSPSPSSHDCSSSSPRNSEKKQ              | 2.8                      | At1g21060.1 | 2         | expressed protein                                                                |
| MGAVVGGPNDNDVYGDERTDYQHAE              | 2.8                      | At2g44560.1 | 450       | glycosyl hydrolase family 9                                                      |
| MGNSSGGPPPPPPMPLANGATPP                | 2.8                      | At1g61080.1 | 582       | proline-rich protein family                                                      |
| MGAGLGKECALLTDGRFSGGSHGFV              | 2.7                      | At3g23940.1 | 506       | dihydroxyacid dehydratase -related similar to dihydroxyacid dehydratase GB:CAA60 |
| MGSHSSQLSSELVEEGSERAIIVSP              | 2.7                      | At4g25540.1 | 489       | DNA mismatch repair protein MSH3 identical to SP O65607 DNA mismatch repair prot |
| MGSGVSSSTAMAGSSASASASSSS               | 2.7                      | At5g43410.1 | 77        | ethylene response factor, putative contains AP2 DNA-binding domain               |
| MGFCFGGGRVVDVLATDESGYFSTG              | 2.7                      | At1g35420.1 | 198       | expressed protein                                                                |
| MGNTVVKARTGSWLPKKAIDYVYA               | 2.7                      | At4g19960.1 | 789       | potassium transporter, putative (KUP9/HAK9/KT9/POT9) similar to potassium transp |
| MGCSASVISIDIVKNIFKTYKNKLA              | 2.6                      | At1g07720.1 | 166       | beta-ketoacyl-CoA synthase family similar to GB:AAC99312 from [Arabidopsis thali |
| MGHALSLAKDELYDCHELAKKFRAI              | 2.6                      | At4g38270.1 | 278       | glycosyltransferase family 8 contains Pfam profile: PF01501 glycosyl transferase |
| MGQYFGRSSFQQLIGNDNPBGVAG               | 2.6                      | At5g13250.1 | 234       | hypothetical protein                                                             |
| MGLSSATGKGKASQNESTTSCMFFH              | 2.6                      | At3g42100.1 | 126       | hypothetical protein very low similarity to SP Q9UUA2 DNA repair and recombinati |
| MGCYVVGSAKSNEKVDLLKNKFGFD              | 2.6                      | At3g03080.1 | 184       | NADP-dependent oxidoreductase (P2), putative similar to probable NADP-dependent  |
| MGAGRGRGRGGADGGAPGKQPSGA               | 2.6                      | At1g50300.1 | 173       | RRM-containing RNA-binding protein, putative contains similarity to RNA-binding  |
| MGNSSSSSSQNISTLYSLLHGSSSN              | 2.6                      | At3g02150.2 | 287       | TCP family transcription factor TFPD identical to GP:6681577 TFPD {Arabidopsis t |
| MGCSAGLISVDLARDLLQVHPNSNA              | 2.6                      | At1g68530.1 | 223       | very-long-chain fatty acid condensing enzyme (CUT1) identical to very-long-chain |
| MGCSAGLISVDLARDLLQVHPNSNA              | 2.6                      | At1g68530.2 | 223       | very-long-chain fatty acid condensing enzyme (CUT1) identical to very-long-chain |
| MGGAAVLLSNRSDRSRSKYQLIHT               | 2.5                      | At5g43760.1 | 298       | beta-ketoacyl-CoA synthase, putative similar to beta-ketoacyl-CoA synthase [Simm |
| MGCLTSTKRLALCLQPPLDSCPIGV              | 2.5                      | At5g56440.1 | 266       | F-box protein family contains F-box domain Pfam:PF00646                          |

| Sequence (predicted myrist - internal) | HMM <sub>266</sub> Score | ID          | Start pos | Description                                                                      |
|----------------------------------------|--------------------------|-------------|-----------|----------------------------------------------------------------------------------|
| MGSSFSFGFGAGSGQTTKTRHKPRL              | 2.4                      | At2g41520.1 | 41        | DnaJ domain-containing protein contains Pfam profiles PF00226: DnaJ domain, PF00 |
| MGSNSSSSCLTGEAKKTNQIIKKG               | 2.4                      | At1g75770.1 | 89        | expressed protein                                                                |
| MGNSTSLRGSTSHSPRDTPVFINSG              | 2.4                      | At4g13800.1 | 299       | expressed protein                                                                |
| MGSCVVILSDGEVPVKADASTIAIS              | 2.4                      | At2g22400.1 | 733       | expressed protein                                                                |
| MGCLWSKLVKTKTSKEFKVVSDSYK              | 2.4                      | At1g42150.1 | 213       | hypothetical protein similar to putative transposon protein GI:7267374 from [Ara |
| MGVVFVSCSAGNGGPDPISTNVSP               | 2.4                      | At5g51750.1 | 319       | subtilisin-like serine protease similar to subtilisin-like protease GI:3687307 f |
| MGLSGSGSYIHRGLSGSGPPTFHG               | 2.2                      | At2g45850.1 | 7         | AT-hook DNA-binding protein -related                                             |
| MGLSGSGSYIHRGLSGSGPPTFHG               | 2.2                      | At2g45850.2 | 7         | AT-hook DNA-binding protein -related                                             |
| MGIGSTRNTQDQGSNSVSVSGASPG              | 2.2                      | At1g72390.1 | 81        | expressed protein                                                                |
| MGISIAKHRLEILKLARRDRKPSPL              | 2.2                      | At1g80520.1 | 45        | hypothetical protein                                                             |
| -GSSFSKEKGSVPNGTNPSTRRKL               | 2.2                      | At4g19180.1 | 88        | hypothetical protein apyrase (EC 3.6.1.5), potato, PIR2:JC4616                   |
| MGNINSNSFQNPCVSNTQHYSAVEE              | 2.2                      | At5g41200.1 | 282       | MADS-box protein                                                                 |
| MGNSASGRGSISMPTRDTPVFTNSG              | 2.2                      | At3g23870.1 | 299       | purine permease - related low similarity to purine permease [Arabidopsis thalian |
| MGESSSKEPEINLNKNEGGLKKNAS              | 2.2                      | At5g60010.1 | 23        | respiratory burst oxidase (NADPH oxidase) family similar to respiratory burst ox |
| MGNSSARGHQCVYEPRNPLDMSHRS              | 2.1                      | At1g68270.1 | 246       | AMP-dependent synthetase and ligase family similar to AMP-binding protein GI:190 |
| MGSTSSNNNGSNTNNNNNASSILR               | 2.1                      | At2g02070.1 | 447       | C2H2-type zinc finger protein -related                                           |
| MGGLTASSPFSAGVLPETVSSRGST              | 2.1                      | At1g45207.1 | 292       | conserved hypothetical protein contains similarity to hypothetical proteins from |
| MGCYVVGSAAGSTKVDLLKTKFGFD              | 2.1                      | At5g17000.1 | 179       | NADP-dependent oxidoreductase, putative strong similarity to probable NADP-depen |
| MGLCISWNGAATNGPIFAEIVPERA              | 2.1                      | At5g10190.1 | 332       | transporter - related low similarity to spinster membrane proteins from [Drosoph |
| MGLLFSSLSDAQDRGGGRVGVWLTE              | 2.0                      | At5g30341.1 | 23        | hypothetical protein                                                             |
| MGCAGAAATDSPIQMNGLPISIIYAP             | 2.0                      | At3g16150.1 | 169       | L-asparaginase -related similar to L-ASPARAGINASE GB:P30364from [Lupinus angusti |
| MGNLGSGLDSSLNTRLRAEEKRD                | 1.9                      | At5g44800.1 | 1882      | chromodomain-helicase-DNA-binding (CHD) protein family similar to chromatin remo |
| MGNNSAKLGNRTPPHCWTFSTAA                | 1.9                      | At3g04650.1 | 314       | expressed protein                                                                |
| MGRSITNSNRSSLDLGRPSSSSSSS              | 1.9                      | At4g19490.1 | 8         | expressed protein probable membrane protein YDR027c, Saccharomyces cerevisiae, P |



| Sequence (predicted myrist - internal) | HMM <sub>266</sub> Score | ID          | Start pos | Description                                                                              |
|----------------------------------------|--------------------------|-------------|-----------|------------------------------------------------------------------------------------------|
| MGRSITNSNRSSLDLGRPSSSSSSSS             | 1.9                      | At4g19490.2 | 8         | expressed protein probable membrane protein YDR027c, <i>Saccharomyces cerevisiae</i> , P |
| -GCSFSSGSEHTGDGIEDYEDDDSP              | 1.9                      | At3g07350.1 | 23        | expressed protein similar to hypothetical protein GB:AAC17612 [ <i>Arabidopsis thali</i> |
| MGNLQSQSGKTGSGIVKITPQYPLY              | 1.9                      | At2g23520.1 | 366       | hypothetical protein                                                                     |
| MGCVTSVTYSVLINGQHFGHITPER              | 1.9                      | At2g16680.1 | 559       | reverse transcriptase (RNA-dependent DNA polymerase), putative similar to revers         |
| MGLNHGVGLNNNNNNGGFNGISTGG              | 1.8                      | At5g62940.1 | 243       | Dof zinc finger protein Dof zinc finger protein, <i>Oryza sativa</i> , EMBL:AB028129     |
| MGSAFAAELGTMQVSEQDTLRVLG               | 1.8                      | At1g19800.1 | 194       | expressed protein                                                                        |
| MGAATSLYSATCFALGKYGNPNYP               | 1.8                      | At5g20060.1 | 128       | expressed protein acyl-protein thioesterase, <i>Homo sapiens</i> , EMBL:AF098668         |
| MGKCSASKSKEVVEKECLGRNYCSI              | 1.8                      | At4g38590.1 | 718       | glycosyl hydrolase family 35 (beta-galactosidase) similar to beta-galactosidase          |
| MGIVVSELLSQLQDWNRRKQFTSSS              | 1.8                      | At3g17205.1 | 425       | hypothetical protein                                                                     |
| MGTCPSVLSNEAISTEQASHDSIEL              | 1.8                      | At3g42420.1 | 298       | hypothetical protein various predicted proteins, including predicted Helicases.          |
| MGCYVVGSAGSKEKVDLLKNKFGFD              | 1.8                      | At5g16960.1 | 180       | NADP-dependent oxidoreductase, putative similar to probable NADP-dependent oxido         |
| MGSGESGSFSPSPQKQLKIENDML               | 1.8                      | At3g01410.1 | 112       | RNase H domain-containing protein low similarity to GAG-POL precursor [ <i>Oryza sat</i> |
| MGSLTRASPDSQPVAREGRISSSLQ              | 1.8                      | At5g01770.1 | 756       | transducin / WD-40 repeat protein family similar to WD-repeat protein mip1 (SP:P         |
| MGTFSVTGSSGGIVNHQDGASSEWF              | 1.7                      | At2g07671.1 | 90        |                                                                                          |
| MGSSLRRKKEDDWESILHRQENSLD              | 1.7                      | At1g63730.1 | 390       | disease resistance protein (TIR-NBS-LRR class), putative domain signature TIR-NB         |
| MGGAFARGYVKKAVSDTGVRCHPL               | 1.7                      | At4g01090.1 | 289       | expressed protein                                                                        |
| MGTASSGSEISSNKGSTRKGLRGGS              | 1.7                      | At4g00450.1 | 1822      | expressed protein                                                                        |
| MGCSAGLISIDLANNLLKANPNSYA              | 1.7                      | At1g01120.1 | 256       | fatty acid elongase 3-ketoacyl-CoA synthase 1 (KCS1) identical to GB:AAC99312 GI         |
| MGMGYSGGSIPPQEETNTNNVGFVS              | 1.7                      | At1g68210.1 | 491       | hypothetical protein                                                                     |
| MGGLISLQSLDMSSNSLSGPLPKSL              | 1.7                      | At4g20940.1 | 146       | leucine rich repeat protein family contains leucine rich-repeat (LRR) domains Pf         |
| MGMVSAKPNASDKVVPAAEMSSSR               | 1.7                      | At4g37210.1 | 394       | tetratricopeptide repeat (TPR)-containing protein low similarity to SP Q02508 Pr         |

| Sequence (predicted myrist - internal) | HMM <sub>266</sub> Score | ID          | Start pos | Description                                                                      |
|----------------------------------------|--------------------------|-------------|-----------|----------------------------------------------------------------------------------|
| MGACDCIITKAGPGTIAESLIRSLP              | 1.6                      | At5g20410.1 | 348       | 1,2-diacylglycerol 3-beta-galactosyltransferase (UDP-galactose:diacylglycerol ga |
| MGCYVVGSAGSKEKVDLLKTKFGFD              | 1.6                      | At5g16990.1 | 177       | allyl alcohol dehydrogenase, putative similar to allyl alcohol dehydrogenase fro |
| MGQACSIIVLRGASHHVLDEAERSLH             | 1.6                      | At5g20890.1 | 362       | chaperonin, putative similar to SWISS-PROT:P78371- T-complex protein 1, beta sub |
| MGNTRRSGGGGGRNNKNKKRSRKGS              | 1.6                      | At4g34910.1 | 569       | DEAD/DEAH box helicase, putative                                                 |
| MGGALGNSRSSMFKRQTKGNQIVQQ              | 1.6                      | At1g54060.1 | 200       | expressed protein                                                                |
| MGCSLAAVTEVSFNLGGLSGAMISN              | 1.6                      | At5g17630.1 | 238       | glucose-6-phosphate/phosphate translocator, putative similar to glucose-6-phosph |
| MGSTQRVLSFSDEKKKKRKKVKEGF              | 1.6                      | At2g17680.1 | 68        | hypothetical protein                                                             |
| MGCYVVGSAGSKEKVDLLKTKFGFD              | 1.6                      | At5g16970.1 | 179       | NADP-dependent oxidoreductase (P1), putative identical to probable NADP-dependen |
| MGCYVVGSAGSKEKVDLLKTKFGFD              | 1.6                      | At5g16980.1 | 73        | NADP-dependent oxidoreductase, putative strong similarity to probable NADP-depen |
| MGGTTRGSSSSGDDSNVFMIFGS                | 1.6                      | At3g54920.1 | 450       | polysaccharide lyase family 1 (pectate lyase) similar to pectate lyase 2 GP:6606 |
| MGRRYSGSFGDLFSWPDGGIGSSG               | 1.5                      | At1g68440.1 | 154       | expressed protein                                                                |
| MGFSTGKRKSRDEEEDRVSFFASEF              | 1.5                      | At4g33160.1 | 102       | F-box protein family (FBX13) contains similarity to fimbriata GI:547307 from [An |
| MGGYMSSKKTMEINPENSIMDELK               | 1.5                      | At5g56010.1 | 595       | heat shock protein, putative strong similarity to SP P55737 Heat shock protein 8 |
| MGGSMRQNKRRRILEKPTRRELSSS              | 1.5                      | At5g55820.1 | 929       | hypothetical protein                                                             |
| MGLGASVLTKTLFAAAFSAFGDPI               | 1.5                      | At5g12860.1 | 145       | oxoglutarate/malate translocator, putative similar to 2-oxoglutarate/malate tran |
| MGSVASLALAIIVVKGKDSSKLWGLV             | 1.5                      | At4g18130.1 | 330       | phytochrome E (PHYE) identical to SP P42498 Phytochrome E {Arabidopsis thaliana} |
| MGMVFGKIAVETPKYTVTKSGDGYE              | 1.4                      | At2g37970.1 | 11        | expressed protein                                                                |
| MGYFSSGGNGYHRNHQNKSQRINGK              | 1.4                      | At4g32620.1 | 1411      | expressed protein predicted protein T10M13.8, Arabidopsis thaliana               |
| MGLLVSRRQHAEHHRAPYNNNYCIV              | 1.4                      | At4g27030.1 | 249       | hypothetical protein gene F19K23.12 of BAC F19K23 from Arabidopsis thaliana chro |
| MGGRGGREAIYSSSTSSAATSSSSV              | 1.4                      | At4g37750.1 | 30        | ovule development protein aintegumenta (ANT) identical to ovule development prot |
| MGLSTRKLEDQTLPVIDSSQSKTSF              | 1.4                      | At2g28880.1 | 614       | para-aminobenzoate (PABA) synthase, component I family similar to PABA synthase  |

| Sequence (predicted myrist - internal) | HMM <sub>266</sub> Score | ID          | Start pos | Description                                                                      |
|----------------------------------------|--------------------------|-------------|-----------|----------------------------------------------------------------------------------|
| -GLFSSKKGKSKKNNSNPPPPPPP               | 1.4                      | At1g72790.1 | 378       | proline-rich protein family contains proline-rich extensin domains, INTERPRO:IPR |
| MGTRVGRDGRRGSRPHKRHRFTRT               | 1.4                      | At1g05910.1 | 265       | tat-binding protein -related similar to GB:CAA56963 from [Saccharomyces cerevisi |
| MGNKSSQSGSTRRSRAAEVHNLSE               | 1.3                      | At3g59060.1 | 241       | bHLH protein family contains Pfam profile: PF00010 helix-loop-helix DNA-binding  |
| MGNKSSQSGSTRRSRAAEVHNLSE               | 1.3                      | At3g59060.2 | 241       | bHLH protein family contains Pfam profile: PF00010 helix-loop-helix DNA-binding  |
| MGTPFGGPSTSAQNPTGAPANKDRN              | 1.3                      | At3g20800.1 | 10        | cell differentiation protein -related similar to cell differentiation protein, R |
| MGHFASNCEGKPKKRAGESDEKGDG              | 1.3                      | At1g75660.1 | 270       | Dhp1-related protein similar to Dhp1 protein GB:BAA04601 GI:496393 from [Schizos |
| MGRLSMCKKIEKGLKNGNKYQDED               | 1.3                      | At2g45740.1 | 146       | expressed protein                                                                |
| MGRLSMCKKIEKGLKNGNKYQDED               | 1.3                      | At2g45740.2 | 146       | expressed protein                                                                |
| MGLNCRCLELEERVVKGEERYTHLE              | 1.3                      | At5g53220.1 | 6         | hypothetical protein                                                             |
| MGAVALHFATSCALNHYTINPRVV               | 1.3                      | At1g52440.1 | 75        | hypothetical protein                                                             |
| MGLACVQLFKIDEAGELFEEARGIL              | 1.3                      | At4g10840.1 | 480       | kinesin light chain - related low similarity to kinesin light chain [Plectonema  |
| MGGYCSKGKINKALRLYHEMTGKGI              | 1.3                      | At5g59900.1 | 479       | pentatricopeptide (PPR) repeat-containing protein contains Pfam profile PF01535: |
| MNCASSPSQSSPEEESVSLESDV                | 1.3                      | At1g07430.1 | 67        | protein phosphatase 2C (PP2C), putative similar to GB:CAB90633 from [Fagus sylva |
| MGRSFSEESGEAERVRLVTELDGL               | 1.2                      | At3g20110.1 | 196       | cytochrome P450 family similar to Cytochrome P450 93A1 (SP:Q42798) {Glycine max  |
| MGSTRSNSSTAPSFAGPTMTSSSA               | 1.2                      | At5g03150.1 | 381       | expressed protein zinc finger protein, Arabidopsis thaliana, EMBL:AL132953       |
| MVGVDSSGSPKPIRIVVVGEKGSBK              | 1.2                      | At3g05310.1 | 3         | GTP-binding protein - related low similarity to rac 1 protein [Physcomitrella pa |
| MGNCASSPRYENFMTPTIPSSKRL               | 1.2                      | At5g06100.1 | 209       | myb family transcription factor contains Pfam profile: PF00249 myb DNA-binding d |
| MGNCASSPRYENFMTPTIPSSKRL               | 1.2                      | At5g06100.2 | 209       | myb family transcription factor contains Pfam profile: PF00249 myb DNA-binding d |
| MGRSFRAGWGPNGVLFHTGKPICSS              | 1.2                      | At1g80680.1 | 370       | nucleoporin PRECOZ (PRE) annotation temporarily based on supporting cDNA gi 2265 |
| MGLSDSDFETEDDESDDSEDTGE                | 1.2                      | At3g49140.1 | 932       | pentatricopeptide (PPR) repeat-containing protein contains Pfam profile PF01535: |

| Sequence (predicted myrist - internal) | HMM <sub>266</sub> Score | ID          | Start pos | Description                                                                                     |
|----------------------------------------|--------------------------|-------------|-----------|-------------------------------------------------------------------------------------------------|
| MGNLFCSKYSVHRRFDLKGSSLGRT              | 1.2                      | At2g41210.1 | 550       | phosphatidylinositol-4-phosphate 5-kinase -related                                              |
| MGGFLTNSYSPKKFRSRHKKLCFGP              | 1.2                      | At3g03600.1 | 103       | ribosomal protein S2p family similar to putative ribosomal protein S2 GB:CAA7422                |
| MGAYHKGKFSFDAFSHKKAVLYRSLF             | 1.1                      | At1g44170.1 | 423       | aldehyde dehydrogenase, putative (ALDH) similar to aldehyde dehydrogenase ALDH [                |
| MGAYHKGKFSFDAFSHKKAVLYRSLF             | 1.1                      | At1g44170.2 | 423       | aldehyde dehydrogenase, putative (ALDH) similar to aldehyde dehydrogenase ALDH [                |
| MMSGSTVPGDPAGARLKPGSGYGYG              | 1.1                      | At5g19620.1 | 674       | expressed protein outer membrane protein (IAP75) - Pisum sativum, L36858                        |
| MGAAMSLFRRRFNRDPSKYPNQRIT              | 1.1                      | At5g28235.1 | 415       | Ulp1 protease family contains Pfam profile PF02902: Ulp1 protease family, C-term                |
| MGAAMSLFRRRFNRDPSKYPNQRIA              | 1.1                      | At5g45570.1 | 692       | Ulp1 protease family contains Pfam profile PF02902: Ulp1 protease family, C-term                |
| MGAAMSLFRRRFNRDPSKYPNQRIA              | 1.1                      | At4g08430.1 | 579       | Ulp1 protease family similar to At5g45570, At5g28235; contains Pfam profile PF02                |
| MGRSCSEENGEAERVRLVTKTDAL               | 1.0                      | At2g27010.1 | 174       | cytochrome P450 family similar to Cytochrome P450 93A1 (SP:Q42798) {Glycine max                 |
| MGLSLGDGRSEADFIKEIVKEVERV              | 1.0                      | At1g47370.1 | 150       | disease resistance protein (TIR class), putative domain signature TIR exists, su                |
| MGNHGKRGRSEDSSSNVSIQVETD               | 1.0                      | At3g13030.1 | 19        | expressed protein                                                                               |
| MGLFSSSSGDLRYKFQVCHENQVKS              | 1.0                      | At2g24240.1 | 188       | expressed protein                                                                               |
| MGCKARHAFKISR RVFELIRSEGS              | 1.0                      | At5g60760.1 | 48        | expressed protein various predicted proteins, Arabidopsis thaliana                              |
| MGTIASGCPETFAEVEGSSGRGGGG              | 1.0                      | At1g03890.1 | 105       | globulin (seed storage protein) family similar to Arabidopsis thaliana 12S seed                 |
| MGNTITGITLGLGPDGELKYPHQH               | 1.0                      | At5g18670.1 | 239       | glycosyl hydrolase family 14 (beta-amylase) almost identical to beta-amylase BMY                |
| -GCFSSSPFHGTTSEHPPHSTPTV               | 1.0                      | At5g51920.1 | 17        | hypothetical protein strong similarity to unknown protein (pir T05129)                          |
| MGIGAAGSTRISNELGAGNPEVARL              | 1.0                      | At2g04090.1 | 308       | MATE efflux protein family similar to ripening regulated protein DDTFR18 [Lycopericon obscurum] |
| MGGVSAAVSKTAAAPIERVKLLIQN              | 1.0                      | At3g08580.1 | 86        | mitochondrial ADP,ATP carrier protein 1 identical to SWISS-PROT:P31167 ADP,ATP c                |
| MGGVSAAVSKTAAAPIERVKLLIQN              | 1.0                      | At3g08580.2 | 86        | mitochondrial ADP,ATP carrier protein 1 identical to SWISS-PROT:P31167 ADP,ATP c                |
| MGGVSAAVSKTAAAPIERVKLLIQN              | 1.0                      | At5g13490.1 | 90        | mitochondrial ADP,ATP carrier protein 2 identical to SWISS-PROT:P40941 ADP,ATP c                |

| Sequence (predicted myrist - internal) | HMM <sub>266</sub> Score | ID          | Start pos | Description                                                                       |
|----------------------------------------|--------------------------|-------------|-----------|-----------------------------------------------------------------------------------|
| MGGVSAAVSKTAAAPIERVKLLIQN              | 1.0                      | At4g28390.1 | 85        | mitochondrial ADP,ATP carrier protein, putative similar to mitochondrial ADP,ATP  |
| MGTFHGKPSGCLLFELSHMLRKNTN              | 0.9                      | At3g25100.1 | 216       | Cdc45-related protein similar to Cdc45 GB: AAC67520 [Xenopus laevis] (EMBO J. 17, |
| MGGVHASMVGSLHPTPVATLPFLSP              | 0.9                      | At3g12150.1 | 214       | expressed protein                                                                 |
| -GGSVKSRLSDASKGENQNARKSR               | 0.9                      | At3g11590.1 | 598       | expressed protein                                                                 |
| MGIAFVKFLYDKDNKVVVGDDHGSK              | 0.9                      | At1g60110.1 | 484       | jacalin lectin family similar to myrosinase-binding protein homolog [Arabidopsis  |
| MGTKVTVISTSERKRDEAVTRLGAD              | 0.9                      | At4g37980.1 | 202       | mannitol dehydrogenase (ELI3-1), putative identical to GI:16267                   |
| MGSLFAVLVFRNIPSISGAAFFGL               | 0.9                      | At1g77860.1 | 171       | membrane protein, Rhomboid family contains PFAM domain PF01694, Rhomboid family   |
| MGHSYVRAKSGSSVMKKIAINFGYD              | 0.9                      | At5g14880.1 | 728       | potassium transporter, putative (KUP8/HAK8/KT8/POT8) similar to potassium transp  |
| MGLPHSGSVSPLSPLGEACSRDLT               | 0.9                      | At4g00710.1 | 324       | protein kinase family low similarity to protein kinase [Arabidopsis thaliana] GI  |
| MGINLSSNTDSVLRCSYSDSDWAGCK             | 0.9                      | At4g10690.1 | 1261      | retrotransposon like protein copia-like retrotransposon Hopscotch polyprotein -   |
| MGAASSDGDNDNHVELLSLLQRS                | 0.9                      | At1g20150.1 | 37        | subtilisin-like serine protease similar to subtilisin-type protease precursor GI  |
| MGLAISWVEKAALPEERRQGILRRL              | 0.8                      | At3g10572.1 | 173       | 3-phosphoinositide-dependent protein kinase-1, putative annotation temporarily b  |
| MGLIHVRRISANEANGNLTPSMEVK              | 0.8                      | At3g05850.1 | 596       | expressed protein                                                                 |
| MGLFSSSSGELRYKFQVSHDNQVKS              | 0.8                      | At4g30940.1 | 186       | expressed protein predicted protein, Caenorhabditis elegans, PID:G1707206         |
| MGVNLRSLKDGFDKGNRSRVHLMAN              | 0.8                      | At3g42330.1 | 78        | hypothetical protein                                                              |
| MGSVTSNDPSALFRGLASSNSSSV               | 0.7                      | At2g02080.1 | 388       | C2H2-type zinc finger protein -related                                            |
| MGSGTGLGRAGAMRPTNSMVGS                 | 0.7                      | At3g59290.1 | 888       | epsin-related protein Af10-protein - Avena fatua, EMBL:U80041                     |
| MGMVGSQKLPMPPTTGRWNRSDPN               | 0.7                      | At2g33420.1 | 987       | expressed protein                                                                 |
| MGTVFTRRFEADRVGSQVPVKLMHL              | 0.7                      | At5g58510.1 | 175       | expressed protein KIAA0066, Homo sapiens, EMBL:HSORFKG10                          |
| MGRASSSLSPGHRHFAGQANELITE              | 0.7                      | At5g47380.1 | 117       | expressed protein similar to unknown protein (pir T02421)                         |
| MGSASARFRISATASLPVLHRYKA               | 0.7                      | At5g67470.1 | 858       | formin homology 2 (FH2) domain-containing protein contains formin homology 2 dom  |
| MGNKMSVLAGDFLLSRACGALAALK              | 0.7                      | At2g34630.1 | 99        | geranyl diphosphate synthase (GPPS)(dimethylallyltransferase) identical to GI:11  |
| MGISLVRIDYAPHGQNPPHPTHPRGS             | 0.7                      | At5g39130.1 | 92        | germin-like protein (AtGER2) identical to germin-like protein subfamily 1 member  |

| Sequence (predicted myrist - internal) | HMM <sub>266</sub> Score | ID          | Start pos | Description                                                                      |
|----------------------------------------|--------------------------|-------------|-----------|----------------------------------------------------------------------------------|
| MGISLVRIDYAPHGQNPPTHPRGS               | 0.7                      | At5g39190.1 | 92        | germin-like protein (AtGER2) identical to germin-like protein subfamily 1 member |
| MGISLVRIDYAPHGQNPPTHPRGS               | 0.7                      | At5g39160.1 | 92        | germin-like protein (GLP2a) (GLP5A) identical to germin-like protein subfamily 1 |
| MGATVGGDGDТАVVAEQNRQLKGEI              | 0.7                      | At1g62990.1 | 9         | homeodomain-containing protein HD1 -related similar to GB:Z29073 from [Brassica  |
| MGIKGSIEQSTGDNGSEDKSIHIE               | 0.7                      | At3g07530.1 | 637       | hypothetical protein                                                             |
| MGIAFVKFLYDKDNKFVVGGDDHGSK             | 0.7                      | At1g60130.1 | 486       | jacalin lectin family similar to myrosinase-binding protein homolog [Arabidopsis |
| MGSVIGKSGKVINLIRQETRARIKV              | 0.7                      | At5g46190.1 | 55        | KH domain protein strong similarity to unknown protein (pir T04533)              |
| MGSVNVNSASSASSCGSTSSVMNK               | 0.7                      | At1g67890.1 | 446       | protein kinase -related C-terminal region similar to MAP3K delta-1 protein kinas |
| MGSGYGVAAAAAYGGGKSHGNNG                | 0.7                      | At1g17640.1 | 323       | RNA recognition motif (RRM) - containing protein contains InterPro entry IPR0005 |
| MGFLSSSTRKEAKTTRPNKAHPST               | 0.7                      | At2g41835.1 | 146       | zinc finger protein (PMZ) -related temporary automated functional assignment     |
| MGSNSTAELEAAGDGGGNGTHMP                | 0.6                      | At2g01420.1 | 422       | auxin transport protein, putative similar to auxin transport protein PIN7[Arabid |
| MGSNSTAELEAAGDGGGNGTHMP                | 0.6                      | At2g01420.2 | 426       | auxin transport protein, putative similar to auxin transport protein PIN7[Arabid |
| MGMNASLHTTMSDPSNLNHHSIGQA              | 0.6                      | At3g23280.2 | 275       | auxin-regulated protein contains Pfam profile: PF00023 ankyrin repeat            |
| MGMNASLHTTMSDPSNLNHHSIGQA              | 0.6                      | At3g23280.1 | 299       | auxin-regulated protein contains Pfam profile: PF00023 ankyrin repeat            |
| MGIVTSFAFPEASSGDNSKVLPIFI              | 0.6                      | At1g64170.1 | 183       | cation/hydrogen exchanger, putative (CHX16) monovalent cation:proton antiporter  |
| MGGGGGGGYNPFHGGGGGGQYTFH               | 0.6                      | At5g03160.1 | 441       | expressed protein P58 protein, Bos primigenius taurus, PIR:A56534                |
| MGNVHGRVEPKNGSSQALLIGSHMD              | 0.6                      | At4g20070.1 | 145       | hydantoin utilization protein-related contains similarity to hydantoin utilizati |
| MGISSWSVADVLRSHVRRRHRTAT               | 0.6                      | At4g13470.1 | 87        | hypothetical protein various predicted proteins, Arabidopsis thaliana            |
| MGCSYRGLFRVGVVAVVCVMSVCSL              | 0.6                      | At5g24590.1 | 25        | No apical meristem (NAM) protein family contains Pfam PF02365: No apical meriste |
| MGCSYRGLFRVGVVAVVCVMSVCSL              | 0.6                      | At5g24590.2 | 425       | No apical meristem (NAM) protein family contains Pfam PF02365: No apical meriste |
| MGNSQICPTGTEKDCNGTQPKPMSI              | 0.6                      | At3g25560.1 | 204       | somatic embryogenesis receptor-related kinase similar to somatic embryogenesis r |
